# Supplementary material for: I2/TBHP-Mediated tandem cyclization and oxidation reaction: Facile access to 2-substituted thiazoles and benzothiazoles
Source: Royal Society of Chemistry journal article supplement (doi:10.1039/c8ob02826e), 2018-12-10

# **Supporting Information**

## **Domino Cyclization and Oxidation Approach for One-Pot Access to Thiazoles and Benzothiazoles**

<sup>a</sup>Department of Organic Chemistry, Faculty of Science, Beijing University of Chemical Technology, Beijing 100029, China. Email: dhg@mail.buct.edu.cn  
tanjj@mail.buct.edu.cn

<sup>b</sup>College of Chemistry and Pharmaceutical Engineering, Nanyang Normal University, Nanyang, Henan 473061, P. R. China. E-mail: xukun@nynu.edu.cn

## **Table of Contents**

| <b><u>I.</u></b>                                                 | <b><u>General</u></b> | <b><u>Methods</u></b> |
|------------------------------------------------------------------|-----------------------|-----------------------|
| 2                                                                |                       |                       |
| <b><u>II. Analytical Characterization Data of Products</u></b>   |                       | 2                     |
| <b><u>III. Scale-up Synthesis and Synthetic Applications</u></b> |                       | 19                    |
| <b><u>IV. Mechanistic Experiments</u></b>                        |                       | 21                    |
| <b><u>V. Spectrum</u></b>                                        |                       | 23                    |

## I. General Methods.

All reactions were carried out in schlenk tubes. The reactions were monitored by thin-layer chromatography on silica gel 60-F254 coated 0.2 mm plates. Visualization was accomplished by UV light (254 nm). The crude products were purified by flash column chromatography using silica gel (normal phase, 200-300 mesh).  $^1\text{H}$  NMR spectra were recorded on a 400 MHz spectrometer at ambient temperature. Data were reported as follows: (1) chemical shift in parts per million ( $\delta$ , ppm) from  $\text{CDCl}_3$  (7.26 ppm),  $\text{DMSO}-d_6$  (2.50 ppm); (2) multiplicity (s = singlet, br = broad, d = doublet, t = triplet, q = quartet, and m = multiplet); (3) coupling constants (Hz).  $^{13}\text{C}$  NMR spectra were recorded on a 100 MHz spectrometer at ambient temperature. Chemical shifts were reported in ppm from  $\text{CDCl}_3$  (77.10 ppm),  $\text{DMSO}-d_6$  (39.52 ppm). Melting points were obtained on a melting point apparatus and the data are uncorrected. HR-MS analyses were carried out using a time-of-flight (TOF)-MS instrument with an electrospray ionization (ESI) source. All commercial materials were used as received unless otherwise noted. 4Å molecular sieves (powder) were activated at 100 °C

## II. Analytical Characterization Data of Products

### 1) General procedure A:

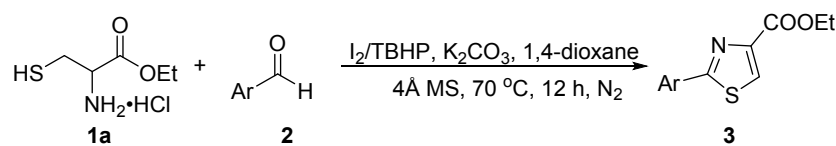

A mixture of L-cysteine ethyl ester hydrochloride (**1a**, 0.8 mmol, 0.1486 g, 4.0 equiv.), benzaldehyde (0.2 mmol, 0.0212 g, 1.0 equiv.),  $\text{K}_2\text{CO}_3$  (0.6 mmol, 0.0828 g, 3.0 equiv.),  $\text{I}_2$  (0.06 mmol, 0.0152 g, 0.3 equiv.), 4Å molecular sieve (0.4 g) was charged in a schlenk tube and purged with nitrogen gas for three times. 1,4-Dioxane (1 mL), and TBHP (70% in cyclohexane, 0.8 mmol, 0.1029 g, 4 equiv.) were then added slowly to the mixture at room temperature. The mixture was stirred at 70 °C for 12 hours. The resultant solution was quenched with aqueous saturated sodium

thiosulfate solution (4 mL) and extracted with ethyl acetate (3×30 mL). The organic phase was combined and washed with brine (3×30 mL), dried over anhydrous sodium sulfate, filtered and concentrated in vacuo. The crude product was further purified by silica gel flash chromatography (petroleum ether (PE) and ethyl acetate (EA) as the eluent).

### Ethyl 2-phenylthiazole-4-carboxylate (**3a**)

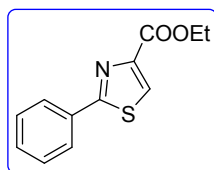

Following the general procedure A, the crude product was purified by silica gel flash chromatography (PE: EA=25:1 as the eluent) to give **3a** (88% yield) as a yellow oil. <sup>1</sup>H NMR (400 MHz, CDCl<sub>3</sub>): δ 8.15 (s, 1H), 8.01-7.99 (m, 2H), 7.44-7.43 (m, 3H), 4.44 (q, *J* = 7.1 Hz, 2H), 1.43 (t, *J* = 7.1 Hz, 3H). <sup>13</sup>C NMR (100 MHz, CDCl<sub>3</sub>): δ 168.9, 161.5, 148.1, 132.8, 130.7, 128.9, 127.1, 127.0, 61.5, 14.4. HRMS (ESI): Calcd for C<sub>12</sub>H<sub>12</sub>NO<sub>2</sub>S<sup>+</sup> [M+H]<sup>+</sup> 234.0583, found 234.0582.

### Ethyl 2-(p-tolyl)thiazole-4-carboxylate (**3b**)

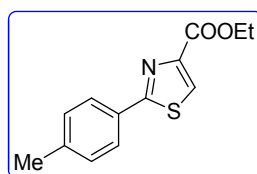

Following the general procedure A, the crude product was purified by silica gel flash chromatography (PE: EA=25:1 as the eluent) to give **3b** (79% yield) as a yellow oil. <sup>1</sup>H NMR (400 MHz, CDCl<sub>3</sub>): δ 8.11 (s, 1H), 7.89 (d, *J* = 8.2 Hz, 2H), 7.24 (d, *J* = 8.0 Hz, 2H), 4.44 (q, *J* = 7.1 Hz, 2H), 2.39 (s, 3H), 1.42 (t, *J* = 7.1 Hz, 3H). <sup>13</sup>C NMR (100 MHz, CDCl<sub>3</sub>): δ 169.1, 161.5, 147.9, 141.1, 130.2, 129.6, 126.9, 126.7, 61.5, 21.5, 14.4. HRMS (ESI): Calcd for C<sub>13</sub>H<sub>14</sub>NO<sub>2</sub>S<sup>+</sup> [M+H]<sup>+</sup> 248.0740, found 248.0739.

### Ethyl 2-(m-tolyl)thiazole-4-carboxylate (**3c**)

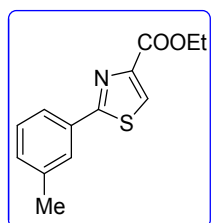

Following the general procedure A, the crude product was purified by silica gel flash chromatography (PE: EA=25:1 as the eluent) to

give **3c** (73% yield) as a yellow oil.  $^1\text{H}$  NMR (400 MHz,  $\text{CDCl}_3$ ):  $\delta$  8.14 (s, 1H), 7.86 (s, 1H), 7.77 (d,  $J = 7.6$  Hz, 1H), 7.32 (t,  $J = 7.6$  Hz, 1H), 7.25 (d,  $J = 7.6$  Hz, 1H), 4.45 (q,  $J = 7.1$  Hz, 2H), 2.41 (s, 3H), 1.43 (t,  $J = 7.1$  Hz, 3H).  $^{13}\text{C}$  NMR (100 MHz,  $\text{CDCl}_3$ ):  $\delta$  169.1, 161.5, 148.0, 138.8, 132.7, 131.5, 128.8, 127.5, 126.9, 124.2, 61.5, 21.3, 14.4. HRMS (ESI): Calcd for  $\text{C}_{13}\text{H}_{14}\text{NO}_2\text{S}^+ [\text{M}+\text{H}]^+$  248.0740, found 248.0740.

#### Ethyl 2-(o-tolyl)thiazole-4-carboxylate (**3d**)

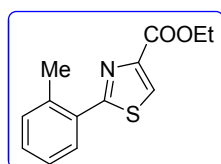

Following the general procedure A, the crude product was purified by silica gel flash chromatography (PE: EA=20:1 as the eluent) to give **3d** (83% yield) as a yellow oil.  $^1\text{H}$  NMR (400 MHz,  $\text{CDCl}_3$ ):  $\delta$  8.23 (s, 1H), 7.69(d,  $J = 7.52$  Hz, 1H), 7.36-7.25 (m, 3H), 4.44 (q,  $J = 7.1$  Hz, 2H), 2.58 (s, 3H), 1.42 (t,  $J = 7.1$  Hz, 3H).  $^{13}\text{C}$  NMR (100 MHz,  $\text{CDCl}_3$ ):  $\delta$  168.3, 161.6, 147.5, 136.8, 132.4, 131.4, 130.2, 129.9, 127.7, 126.1, 61.4, 21.3, 14.4. HRMS (ESI): Calcd for  $\text{C}_{13}\text{H}_{14}\text{NO}_2\text{S}^+ [\text{M}+\text{H}]^+$  248.0740, found 248.0740.

#### Ethyl 2-(3-methoxyphenyl)thiazole-4-carboxylate (**3e**)

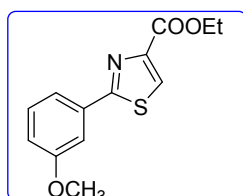

Following the general procedure A, the crude product was purified by silica gel flash chromatography (PE: EA=15:1 as the eluent) to give **3e** (95% yield) as a white solid. Mp 58 °C.  $^1\text{H}$  NMR (400 MHz,  $\text{CDCl}_3$ ):  $\delta$  8.15 (s, 1H), 7.58-7.53 (m, 2H), 7.34 (t,  $J = 8.0$  Hz, 1H), 7.00-6.98 (m, 1H), 4.44 (q,  $J = 7.1$  Hz, 2H), 3.88 (s, 3H), 1.43 (t,  $J = 7.1$  Hz, 3H).  $^{13}\text{C}$  NMR (100 MHz,  $\text{CDCl}_3$ ):  $\delta$  168.7, 161.4, 160.0, 147.9, 134.0, 129.9, 127.2, 119.6, 117.0, 111.6, 61.5, 55.5, 14.4. HRMS (ESI): Calcd for  $\text{C}_{13}\text{H}_{14}\text{NO}_3\text{S}^+ [\text{M}+\text{H}]^+$  264.0689, found 264.0690.

#### Ethyl 2-(4-methoxyphenyl)thiazole-4-carboxylate (**3f**)

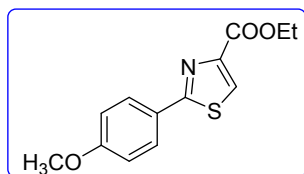

Following the general procedure A, the crude product was purified by silica gel flash chromatography (PE: EA=15:1 as the eluent) to give **3f** (85% yield) as a white solid. Mp 96 °C. <sup>1</sup>H NMR (400 MHz, CDCl<sub>3</sub>): δ 8.08 (s, 1H), 7.95-7.93 (m, 2H), 6.95 (d, *J* = 8.8 Hz, 2H), 4.44 (q, *J* = 7.1 Hz, 2H), 3.85 (s, 3H), 1.42 (t, *J* = 7.1 Hz, 3H). <sup>13</sup>C NMR (100 MHz, CDCl<sub>3</sub>): δ 168.7, 161.6, 161.5, 147.8, 128.5, 126.3, 125.7, 114.3, 61.4, 55.4, 14.4. HRMS (ESI): Calcd for C<sub>13</sub>H<sub>14</sub>NO<sub>3</sub>S<sup>+</sup> [M+H]<sup>+</sup> 264.0689; found 264.0689.

### Ethyl 2-(2-methoxyphenyl)thiazole-4-carboxylate (**3g**)

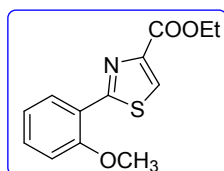

Following the general procedure A, the crude product was purified by silica gel flash chromatography (PE: EA=15:1 as the eluent) to give **3g** (89% yield) as a yellow oil. <sup>1</sup>H NMR (400 MHz, CDCl<sub>3</sub>): δ 8.52 (dd, *J* = 7.8, 1.4 Hz, 1H), 8.20 (s, 1H), 7.44-7.39 (m, 1H), 7.09 (t, *J* = 7.6 Hz, 1H), 7.03 (d, *J* = 8.3 Hz, 1H), 4.45 (q, *J* = 7.1 Hz, 2H), 4.03 (s, 3H), 1.43 (t, *J* = 7.1 Hz, 3H). <sup>13</sup>C NMR (100 MHz, CDCl<sub>3</sub>): δ 163.0, 161.9, 156.52, 146.1, 131.3, 129.1, 127.9, 121.6, 121.1, 111.2, 61.3, 55.6, 14.4. HRMS (ESI): Calcd for C<sub>13</sub>H<sub>14</sub>NO<sub>3</sub>S<sup>+</sup> [M+H]<sup>+</sup> 264.0689, found 264.0688.

### Ethyl 2-(2-bromophenyl)thiazole-4-carboxylate (**3h**)

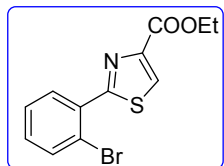

Following the general procedure A, the crude product was purified by silica gel flash chromatography (PE: EA=20:1 as the eluent) to give **3h** (66% yield) as a yellow oil. <sup>1</sup>H NMR (400 MHz, CDCl<sub>3</sub>): δ 8.30 (s, 1H), 8.11 (dd, *J* = 7.8, 1.7 Hz, 1H), 7.69 (dd, *J* = 8.0, 1.0 Hz, 1H), 7.42 (td, *J* = 7.8, 1.2 Hz, 1H), 7.30 (td, *J* = 7.8, 1.5 Hz, 1H), 4.46 (q, *J* = 7.1 Hz, 2H), 1.43 (t, *J* = 7.1 Hz, 3H). <sup>13</sup>C NMR (100 MHz, CDCl<sub>3</sub>): δ 165.7, 161.5, 146.9, 133.9, 133.5, 132.1, 131.1, 128.5, 127.7, 121.8, 61.5, 14.4. HRMS (ESI): Calcd for C<sub>12</sub>H<sub>11</sub>BrNO<sub>2</sub>S<sup>+</sup> [M+H]<sup>+</sup> 311.9688, found 311.9691.

### 2-(3-bromophenyl)-4-(ethylperoxy)thiazole (3i)

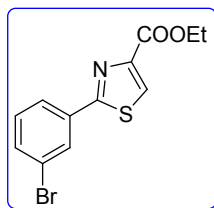

Following the general procedure A, the crude product was purified by silica gel flash chromatography (PE: EA=20:1 as the eluent) to give **3i** (56% yield) as a white solid. Mp 72 °C. <sup>1</sup>H NMR (400 MHz, CDCl<sub>3</sub>): δ 8.20 (t, *J* = 1.8 Hz, 1H), 8.18 (s, 1H), 7.93-7.88 (m, 1H), 7.58 (ddd, *J* = 8.0, 1.8, 0.9 Hz, 1H), 7.33 (t, *J* = 7.9 Hz, 1H), 4.46 (q, *J* = 7.1 Hz, 2H), 1.44 (t, *J* = 7.1 Hz, 3H). <sup>13</sup>C NMR (100 MHz, CDCl<sub>3</sub>): δ 166.9, 161.3, 148.3, 134.6, 133.6, 130.5, 129.8, 127.5, 125.6, 123.2, 61.6, 14.4. HRMS (ESI): Calcd for C<sub>12</sub>H<sub>11</sub>BrNO<sub>2</sub>S<sup>+</sup> [M+H]<sup>+</sup> 311.9688, found 311.9690.

### Ethyl 2-(4-bromophenyl)thiazole-4-carboxylate (3j)

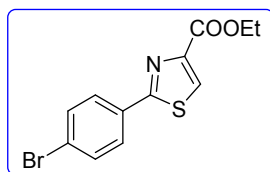

Following the general procedure A, the crude product was purified by silica gel flash chromatography (PE: EA=20:1 as the eluent) to give **3j** (81% yield) as a yellow solid. Mp 99 °C. <sup>1</sup>H NMR (400 MHz, CDCl<sub>3</sub>): δ 8.18 (s, 1H), 7.90-7.88 (m, 2H), 7.61-7.58 (m, 2H), 4.46 (q, *J* = 7.1 Hz, 2H), 1.44 (t, *J* = 7.1 Hz, 3H). <sup>13</sup>C NMR (100 MHz, CDCl<sub>3</sub>): δ 167.6, 161.3, 148.3, 132.2, 131.7, 128.4, 127.2, 125.1, 61.6, 14.4. HRMS (ESI): Calcd for C<sub>12</sub>H<sub>11</sub>BrNO<sub>2</sub>S<sup>+</sup> [M+H]<sup>+</sup> 311.9688, found 311.9690.

### Ethyl 2-(4-chlorophenyl)thiazole-4-carboxylate (3k)

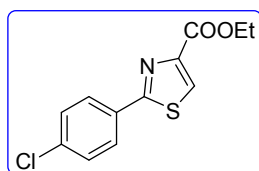

Following the general procedure A, the crude product was purified by silica gel flash chromatography (PE: EA=15:1 as the eluent) to give **3k** (72% yield) as a white solid. Mp 90 °C. <sup>1</sup>H NMR (400 MHz, CDCl<sub>3</sub>): δ 8.16 (s, 1H), 7.95 (d, *J* = 8.5 Hz, 2H), 7.43 (d, *J* = 8.5 Hz, 2H), 4.45 (q, *J* = 7.1 Hz, 2H), 1.43 (t, *J* = 7.1 Hz, 3H). <sup>13</sup>C NMR (100 MHz,

CDCl<sub>3</sub>):  $\delta$  167.5, 161.3, 148.3, 136.8, 131.3, 129.2, 128.2, 127.2, 61.6, 14.4. HRMS (ESI): Calcd for C<sub>12</sub>H<sub>11</sub>ClNO<sub>2</sub>S<sup>+</sup> [M+H]<sup>+</sup> 268.0194, found 268.0198.

### Ethyl 2-(3-chlorophenyl)thiazole-4-carboxylate (**3l**)

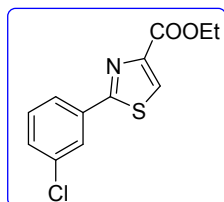

Following the general procedure A, the crude product was purified by silica gel flash chromatography (PE: EA=15:1 as the eluent) to give **3l** (75% yield) as a yellow solid. Mp 66 °C. <sup>1</sup>H NMR (400 MHz, CDCl<sub>3</sub>):  $\delta$  8.18 (s, 1H), 8.04 (t, *J* = 1.6 Hz, 1H), 7.86 (dt, *J* = 7.3, 1.5 Hz, 1H), 7.44-7.36 (m, 2H), 4.46 (q, *J* = 7.1 Hz, 2H), 1.44 (t, *J* = 7.1 Hz, 3H). <sup>13</sup>C NMR (100 MHz, CDCl<sub>3</sub>):  $\delta$  167.1, 161.3, 148.3, 135.2, 134.4, 130.6, 130.2, 127.5, 126.9, 125.1, 61.6, 14.4. HRMS (ESI): Calcd for C<sub>12</sub>H<sub>11</sub>ClNO<sub>2</sub>S<sup>+</sup> [M+H]<sup>+</sup> 268.0194, found 268.0197.

### Ethyl 2-(2-fluorophenyl)thiazole-4-carboxylate (**3m**)

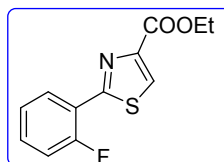

Following the general procedure A, the crude product was purified by silica gel flash chromatography (PE: EA=15:1 as the eluent) to give **3m** (65% yield) as a yellow oil. <sup>1</sup>H NMR (400 MHz, CDCl<sub>3</sub>):  $\delta$  8.41 (td, *J* = 7.7, 1.4 Hz, 1H), 8.27 (s, 1H), 7.45-7.39 (m, 1H), 7.29-7.24 (m, 1H), 7.20 (dd, *J* = 11.1, 9Hz, 1H), 4.456 (q, *J* = 7.1 Hz, 2H), 1.43 (t, *J* = 7.1 Hz, 3H). <sup>13</sup>C NMR (100 MHz, CDCl<sub>3</sub>):  $\delta$  161.5, 161.2 (d, *J* = 4.9 Hz), 160.1 (d, *J* = 250.4 Hz), 146.94, 131.83 (d, *J* = 8.6 Hz), 129.39, 128.25 (d, *J* = 9.1 Hz), 124.69 (d, *J* = 3.0 Hz), 120.63 (d, *J* = 11.2 Hz), 116.02 (d, *J* = 21.5 Hz), 61.50, 14.37. HRMS (ESI): Calcd for C<sub>12</sub>H<sub>11</sub>FNO<sub>2</sub>S<sup>+</sup> [M+H]<sup>+</sup> 252.0489, found 252.0489.

### Ethyl 2-(3-fluorophenyl)thiazole-4-carboxylate (**3n**)

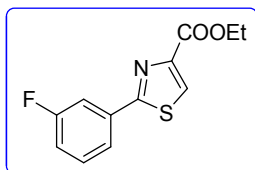

Following the general procedure A, the crude product was purified by silica gel flash chromatography (PE: EA=15:1 as the eluent) to give **3n** (62% yield) as a yellow oil.  $^1\text{H}$  NMR (400 MHz,  $\text{CDCl}_3$ ):  $\delta$  8.18 (s, 1H), 7.76 (d,  $J = 7.3$  Hz, 2H), 7.42 (dd,  $J = 13.9, 7.7$  Hz, 1H), 7.20-7.08 (m, 1H), 4.45 (q,  $J = 7.1$  Hz, 2H), 1.43 (t,  $J = 7.1$  Hz, 3H).  $^{13}\text{C}$  NMR (100 MHz,  $\text{CDCl}_3$ ):  $\delta$  167.3, 163.0 (d,  $J = 245.8$  Hz), 161.3, 148.3, 134.78 (d,  $J = 8.1$  Hz), 130.6 (d,  $J = 8.2$  Hz), 127.5, 122.7 (d,  $J = 2.0$  Hz), 117.6 (d,  $J = 2.2$  Hz), 113.9 (d,  $J = 24.0$  Hz), 61.60, 14.36. HRMS (ESI): Calcd for  $\text{C}_{12}\text{H}_{11}\text{FNO}_2\text{S}^+ [\text{M}+\text{H}]^+$  252.0489, found 252.0492.

#### Ethyl 2-(4-nitrophenyl)thiazole-4-carboxylate (**3o**)

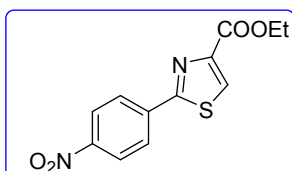

Following the general procedure A, the crude product was purified by silica gel flash chromatography (PE: EA=15:1 as the eluent) to give **3o** (49% yield) as a white solid. Mp 143 °C.  $^1\text{H}$  NMR (400 MHz,  $\text{CDCl}_3$ ):  $\delta$  8.33 (d,  $J = 8.9$  Hz, 2H), 8.28 (s, 1H), 8.20 (d,  $J = 8.9$  Hz, 2H), 4.47 (q,  $J = 7.1$  Hz, 2H), 1.45 (t,  $J = 7.1$  Hz, 3H).  $^{13}\text{C}$  NMR (100 MHz,  $\text{CDCl}_3$ ):  $\delta$  165.8, 161.1, 148.9, 148.9, 138.2, 128.6, 127.7, 124.4, 61.8, 14.4. HRMS (ESI): Calcd for  $\text{C}_{12}\text{H}_{11}\text{N}_2\text{O}_4\text{S}^+ [\text{M}+\text{H}]^+$  279.0434, found 279.0435.

#### Ethyl 2-(4-(trifluoromethyl)phenyl)thiazole-4-carboxylate (**3p**)

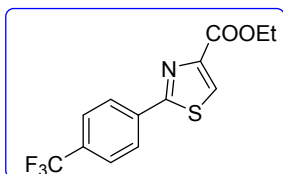

Following the general procedure A, the crude product was purified by silica gel flash chromatography (PE: EA=15:1 as the eluent) to give **3p** (44% yield) as a white solid. Mp 99 °C.  $^1\text{H}$  NMR (400 MHz,  $\text{CDCl}_3$ ):  $\delta$  8.23 (s, 1H), 8.14 (d,  $J = 8.1$  Hz, 2H), 7.72 (d,  $J = 8.2$  Hz, 2H), 4.47 (q,  $J = 7.1$  Hz, 2H), 1.44 (t,  $J = 7.1$  Hz, 3H).  $^{13}\text{C}$  NMR (100 MHz,  $\text{CDCl}_3$ ):  $\delta$  166.9, 161.2, 148.6, 135.9, 132.5, 132.2, 127.9, 127.3, 126.0 (d,  $J = 4.0$



Hz), 61.7, 14.4. HRMS (ESI): Calcd for  $C_{13}H_{11}F_3NO_2S^+$   $[M+H]^+$  302.0457, found 302.0454.

### Ethyl 2-(4-(methylthio)phenyl)-4,5-dihydrothiazole-4-carboxylate (**3q**)

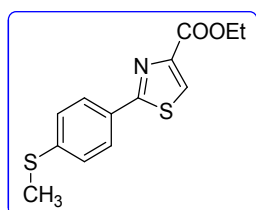

Following the general procedure A, the crude product was purified by silica gel flash chromatography (PE: EA=15:1 as the eluent) to give **3q** (78% yield) as a yellow solid. Mp 80 °C.  $^1H$  NMR (400 MHz,  $CDCl_3$ ):  $\delta$  8.11 (s, 1H), 7.91 (dd,  $J$  = 6.8, 1.7 Hz, 2H), 7.27 (d,  $J$  = 8.5 Hz, 2H), 4.44 (q,  $J$  = 7.1 Hz, 2H), 2.52 (s, 3H), 1.43 (t,  $J$  = 7.1 Hz, 3H).  $^{13}C$  NMR (100 MHz,  $CDCl_3$ ):  $\delta$  168.4, 161.5, 148.0, 142.4, 129.4, 127.2, 126.6, 125.9, 61.5, 15.2, 14.4. HRMS (ESI): Calcd for  $C_{12}H_{15}NO_2S_2^+$   $[M+H]^+$  280.0460, found 280.0460.

### Ethyl (E)-2-(1-phenylprop-1-en-2-yl)thiazole-4-carboxylate (**3r**)

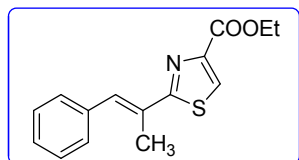

Following the general procedure A, the crude product was purified by silica gel flash chromatography (PE: EA=15:1 as the eluent) to give **3r** (49% yield) as a yellow oil.  $^1H$  NMR (400 MHz,  $CDCl_3$ ):  $\delta$  8.08 (s, 1H), 7.54 (s, 1H), 7.43-7.38 (m, 4H), 7.31-7.28 (m, 1H), 4.43 (q,  $J$  = 7.1 Hz, 2H), 2.45 (s, 3H), 1.42 (t,  $J$  = 7.1 Hz, 3H).  $^{13}C$  NMR (100 MHz,  $CDCl_3$ ):  $\delta$  171.3, 160.5, 146.6, 135.3, 131.3, 129.7, 128.5, 127.4, 126.8, 125.4, 60.4, 15.7, 13.3. HRMS (ESI): Calcd for  $C_{15}H_{16}NO_2S^+$   $[M+H]^+$  274.0896, found 274.0898.

### Ethyl (E)-2-styrylthiazole-4-carboxylate (**3s**)

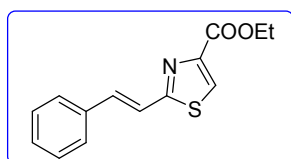

Following the general procedure A, the crude product was purified by silica gel flash chromatography (PE: EA=15:1 as

the eluent) to give **3s** (58% yield) as a yellow oil.  $^1\text{H}$  NMR (400 MHz,  $\text{CDCl}_3$ ):  $\delta$  8.08 (s, 1H), 7.52(d,  $J$  = 7.0 Hz, 2H), 7.41-7.35 (m, 5H), 7.32-7.31 (m, 1H), 4.44 (q,  $J$  = 7.1 Hz, 2H), 1.43 (t,  $J$  = 7.1 Hz, 3H).  $^{13}\text{C}$  NMR (100 MHz,  $\text{CDCl}_3$ ):  $\delta$  167.7, 161.4, 147.8, 136.3, 135.3, 129.4, 128.9, 127.2, 126.4, 121.2, 61.6, 14.4. HRMS (ESI): Calcd for  $\text{C}_{14}\text{H}_{14}\text{NO}_2\text{S}^+ [\text{M}+\text{H}]^+$  260.0740, found 260.0741.

### Ethyl 2-(naphthalen-1-yl)thiazole-4-carboxylate (**3t**)

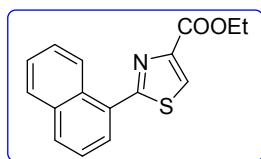

Following the general procedure A, the crude product was purified by silica gel flash chromatography (PE: EA=25:1 as the eluent) to give **3t** (64% yield) as a yellow oil.  $^1\text{H}$  NMR (400 MHz,  $\text{CDCl}_3$ ):  $\delta$  8.74 (d,  $J$  = 8.3 Hz, 1H), 8.32 (s, 1H), 7.98 (d,  $J$  = 8.2 Hz, 1H), 7.93 (d,  $J$  = 8.3 Hz, 1H), 7.84 (dd,  $J$  = 7.1, 0.7 Hz, 1H), 7.64-7.52 (m, 3H), 4.51 (q,  $J$  = 7.1 Hz, 2H), 1.47 (t,  $J$  = 7.1 Hz, 3H).  $^{13}\text{C}$  NMR (100 MHz,  $\text{CDCl}_3$ ):  $\delta$  168.0, 161.60, 147.9, 133.9, 131.0, 130.6, 130.1, 128.9, 128.4, 128.0, 127.7, 126.5, 125.6, 124.9, 61.5, 14.4. HRMS (ESI): Calcd for  $\text{C}_{16}\text{H}_{14}\text{NO}_2\text{S}^+ [\text{M}+\text{H}]^+$  284.0740, found 284.0739

### Ethyl 2-(naphthalen-2-yl)thiazole-4-carboxylate (**3u**)

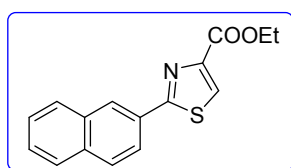

Following the general procedure A, the crude product was purified by silica gel flash chromatography (PE: EA=15:1 as the eluent) to give **3u** (83% yield) as a yellow solid. Mp 75 °C.  $^1\text{H}$  NMR (400 MHz,  $\text{CDCl}_3$ ):  $\delta$  8.52 (s, 1H), 8.19 (s, 1H), 8.10 (dd,  $J$  = 8.5, 1.28 Hz, 1H), 7.95-7.85 (m, 3H), 7.55-7.52 (m, 2H), 4.47 (q,  $J$  = 7.1 Hz, 2H), 1.45 (t,  $J$  = 7.1 Hz, 3H).  $^{13}\text{C}$  NMR (100 MHz,  $\text{CDCl}_3$ ):  $\delta$  168.9, 161.5, 148.2, 134.4, 133.1, 130.1, 128.8, 128.7, 127.9, 127.4, 127.2, 126.9, 126.7, 124.1, 61.6, 14.4. HRMS (ESI): Calcd for  $\text{C}_{16}\text{H}_{14}\text{NO}_2\text{S}^+ [\text{M}+\text{H}]^+$  284.0740, found 284.0740.

### Ethyl 2-(anthracen-9-yl)thiazole-4-carboxylate (**3v**)

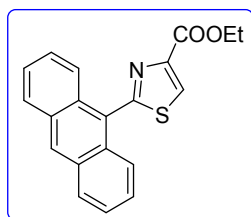

Following the general procedure A, the crude product was purified by silica gel flash chromatography (PE: EA=15:1 as the eluent) to give **3v** (91% yield) as a yellow oil. <sup>1</sup>H NMR (400 MHz, CDCl<sub>3</sub>): δ 8.59 (s, 1H), 8.55 (s, 1H), 8.03 (d, *J* = 7.9 Hz, 2H), 7.68 (d, *J* = 8.4, 2H), 7.49-7.42 (m, 4H), 4.49 (q, *J* = 7.1 Hz, 2H), 1.44 (t, *J* = 7.1 Hz, 3H). <sup>13</sup>C NMR (100 MHz, CDCl<sub>3</sub>): δ 165.9, 161.6, 148.0, 131.3, 130.9, 129.8, 128.5, 126.9, 126.2, 125.5, 125.4, 61.6, 14.4. HRMS (ESI): Calcd for C<sub>20</sub>H<sub>16</sub>N<sub>1</sub>O<sub>2</sub>S<sup>+</sup> [M+H]<sup>+</sup> 334.0896, found 334.0898.

### Ethyl 2-(thiophen-2-yl)thiazole-4-carboxylate (**3w**)

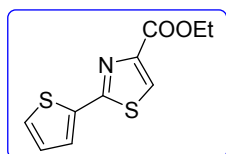

Following the general procedure A, the crude product was purified by silica gel flash chromatography (PE: EA=15:1 as the eluent) to give **3w** (66% yield) as a yellow oil. <sup>1</sup>H NMR (400 MHz, CDCl<sub>3</sub>): δ 8.07 (s, 1H), 7.58 (d, *J* = 3.6 Hz, 1H), 7.44 (d, *J* = 5.0 Hz, 1H), 7.09 (t, *J* = 4.3 Hz, 1H), 4.43 (q, *J* = 7.1 Hz, 2H), 1.42 (t, *J* = 7.1 Hz, 3H). <sup>13</sup>C NMR (100 MHz, CDCl<sub>3</sub>): δ 162.4, 161.2, 147.8, 136.3, 128.7, 127.9, 127.68, 126.3, 61.5, 14.3. HRMS (ESI): Calcd for C<sub>10</sub>H<sub>10</sub>NO<sub>2</sub>S<sub>2</sub><sup>+</sup> [M+H]<sup>+</sup> 240.0147, found 240.0154.

### Ethyl 2-(pyridin-2-yl)thiazole-4-carboxylate (**3x**)

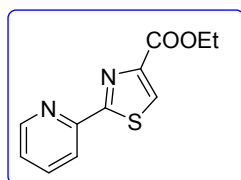

Following the general procedure A, the crude product was purified by silica gel flash chromatography (PE: EA=15:1 as the eluent) to give **3x** (30% yield) as a yellow oil. <sup>1</sup>H NMR (400 MHz, CDCl<sub>3</sub>): δ 8.62 (d, *J* = 4.6 Hz, 1H), 8.33 (d, *J* = 7.9 Hz, 1H), 8.25 (s, 1H), 7.82 (td, *J* = 7.6, 1.24 Hz, 1H), 7.36 (td, *J* = 6.6, 1.4 Hz, 1H), 4.45 (t, *J* = 7.1 Hz, 2H), 1.42 (t, *J* = 7.1 Hz, 3H). <sup>13</sup>C NMR (100 MHz, CDCl<sub>3</sub>): δ 169.9, 161.5, 150.5, 149.4, 148.3,

137.1, 129.5, 125.1, 120.3, 61.5, 14.4. HRMS (ESI): Calcd for  $C_{11}H_{11}N_2O_2S^+ [M+H]^+$  235.0536, found 235.0536.

## 2) General procedure B:

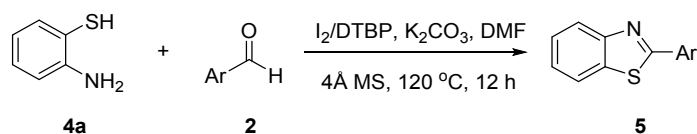

A mixture of 2-aminothiophenol (**4a**, 0.8 mmol, 0.108 g, 4.0 equiv.), benzaldehyde (0.2 mmol, 0.0212 g, 1.0 equiv.), potassium carbonate ( $K_2CO_3$ , 0.6 mmol, 0.0828 g, 3.0 equiv.), iodine ( $I_2$ , 0.06 mmol, 0.0152 g, 0.3 equiv.), 4Å molecular sieve (0.4 g) was charged with DMF (0.2 mL) in a pressure bottle, di-*tert*-butyl peroxide (DTBP, 0.8 mmol, 0.1169 g, 4 equiv.) was then added slowly to the mixture at room temperature. The mixture was stirred at 120 °C for 12 hours. The resultant solution was quenched with aqueous saturated sodium thiosulfate solution (4 mL) and extracted with ethyl acetate (3×30 mL). The organic phase was combined and washed with brine (3×30 mL), dried over anhydrous sodium sulfate, filtered and concentrated in vacuo. The crude product was further purified by silica gel flash chromatography (petroleum ether (PE) and ethyl acetate (EA) as the eluent).

### 2-phenylbenzo[d]thiazole (5a)

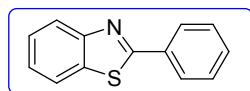

Following the general procedure B, the crude product was purified by silica gel flash chromatography (PE: EA=40:1 as the eluent) to give **5a** (99% yield) as a purple solid. Mp 112 °C.  $^1H$  NMR (400 MHz,  $CDCl_3$ ):  $\delta$  8.09-8.06 (m, 3H), 7.88 (d,  $J$  = 8.0 Hz, 1H), 7.50-7.47 (m, 4H), 7.36 (t,  $J$  = 7.5 Hz, 1H).  $^{13}C$  NMR (100 MHz,  $CDCl_3$ ):  $\delta$  167.0, 153.1, 134.0, 132.6, 129.9, 127.9,

126.5, 125.3, 124.1, 122.2, 120.6. HRMS (ESI): Calcd for  $C_{13}H_{10}NS^+$   $[M+H]^+$  212.0528, found 212.0528.

### 2-(p-tolyl)benzo[d]thiazole (**5b**)

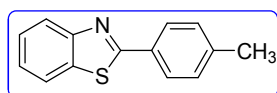

Following the general procedure B, the crude product was purified by silica gel flash chromatography (PE: EA=30:1 as the eluent) to give **5b** (98% yield) as a purple solid. Mp 84 °C.  $^1H$  NMR (400 MHz,  $CDCl_3$ ):  $\delta$  8.05 (d,  $J$  = 8.2 Hz, 1H), 7.97 (d,  $J$  = 8.2 Hz, 2H), 7.86 (dd,  $J$  = 8.0, 0.4 Hz, 1H), 7.48-7.44(m, 1H), 7.37-7.33 (m, 1H), 7.27 (d,  $J$  = 7.9 Hz, 2H), 2.40 (s, 3H).  $^{13}C$  NMR (100 MHz,  $CDCl_3$ ):  $\delta$  167.2, 153.1, 140.4, 133.9, 129.9, 128.7, 126.4, 125.2, 123.9, 122.0, 120.5, 20.5. HRMS (ESI): Calcd for  $C_{14}H_{12}NS^+$   $[M+H]^+$  226.0685, found 226.0685.

### 2-(m-tolyl)benzo[d]thiazole (**5c**)

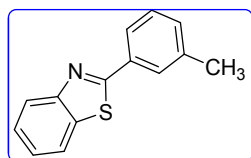

Following the general procedure B, the crude product was purified by silica gel flash chromatography (PE: EA=50:1 as the eluent) to give **5c** (98% yield) as a white solid. Mp 60 °C.  $^1H$  NMR (400 MHz,  $CDCl_3$ ):  $\delta$  8.10 (d,  $J$  = 8.2 Hz, 1H), 7.90-7.88 (m, 1H), 7.75 (dd,  $J$  = 7.5, 0.8 Hz, 1H), 7.51-7.26 (m, 1H), 7.40-7.26 (m, 4H), 2.65 (s, 3H).  $^{13}C$  NMR (100 MHz,  $CDCl_3$ ):  $\delta$  166.9, 152.8, 136.2, 134.5, 132.0, 130.5, 129.5, 128.9, 125.1, 125.0, 124.0, 122.3, 120.3, 20.3. HRMS (ESI): Calcd for  $C_{14}H_{12}NS^+$   $[M+H]^+$  226.0685, found 226.0684.

### 2-(o-tolyl)benzo[d]thiazole (**5d**)

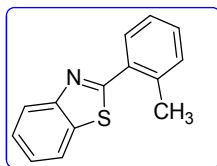

Following the general procedure B, the crude product was purified by silica gel flash chromatography (PE: EA=40:1 as the eluent) to give **5d** (99% yield) as a orange solid. Mp 56 °C. <sup>1</sup>H NMR (400 MHz, CDCl<sub>3</sub>): δ 8.06 (d, *J* = 8.1 Hz, 1H), 7.92 (s, 1H), 7.85 (t, *J* = 7.1 Hz, 2H), 7.49-7.44 (m, 1H), 7.35 (t, *J* = 7.7 Hz, 2H), 7.27 (d, *J* = 7.6 Hz, 1H), 2.43 (s, 3H). <sup>13</sup>C NMR (100 MHz, CDCl<sub>3</sub>): δ 167.2, 153.1, 137.8, 134.0, 132.5, 130.7, 127.9, 126.9, 125.2, 124.0, 123.8, 122.1, 120.5, 20.3. HRMS (ESI): Calcd for C<sub>14</sub>H<sub>12</sub>NS<sup>+</sup> [M+H]<sup>+</sup> 226.0685, found 226.0685.

### 2-(4-(methylthio)phenyl)benzo[d]thiazole (**5e**)

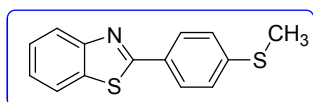

Following the general procedure B, the crude product was purified by silica gel flash chromatography (PE: EA=40:1 as the eluent) to give **5e** (77% yield) as a yellow oil. <sup>1</sup>H NMR (400 MHz, CDCl<sub>3</sub>): δ 8.08 (d, *J* = 8.1 Hz, 1H), 8.02-7.99 (m, 2H), 7.89 (d, *J* = 8.1 Hz, 1H), 7.52-7.48 (m, 1H), 7.40-7.36 (m, 1H), 7.33 (d, *J* = 8.4 Hz, 2H), 2.54 (s, 3H). <sup>13</sup>C NMR (100 MHz, CDCl<sub>3</sub>): δ 167.6, 154.2, 142.8, 134.9, 130.1, 127.8, 126.34, 125.9, 125.2, 123.1, 121.6, 15.2. HRMS (ESI): Calcd for C<sub>14</sub>H<sub>12</sub>NS<sub>2</sub><sup>+</sup> [M+H]<sup>+</sup> 258.0406, found 258.0413.

### 2-(4-fluorophenyl)benzo[d]thiazole (**5f**)

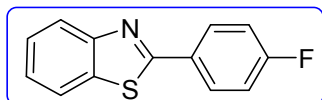

Following the general procedure B, the crude product was purified by silica gel flash chromatography (PE: EA=40:1 as the eluent) to give **5f** (45% yield) as a yellow oil. <sup>1</sup>H NMR (400 MHz, CDCl<sub>3</sub>): δ 8.07-8.04 (m, 3H), 7.86 (dd, *J* = 8.0, 0.4 Hz, 1H), 7.49-7.45 (m, 1H), 7.38-7.33 (m, 1H), 7.17-7.12 (m, 2H). <sup>13</sup>C NMR (100 MHz, CDCl<sub>3</sub>): δ 166.73, 164.47 (d, *J* = 251 Hz), 154.12, 135.08, 129.97 (d, *J* = 3.3 Hz), 129.53 (d, *J* = 8.0 Hz), 126.43, 125.26,

123.22, 121.63, 116.16 (d,  $J = 22.0$  Hz). HRMS (ESI): Calcd for  $C_{13}H_9FNS^+ [M+H]^+$  230.0434, found 230.0437.

### 2-(3-chlorophenyl)benzo[d]thiazole (**5g**)

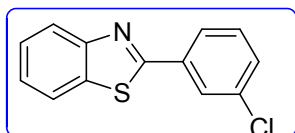

Following the general procedure B, the crude product was purified by silica gel flash chromatography (PE: EA=40:1 as the eluent) to give **5g** (59% yield) as a yellow solid. Mp 95 °C.  $^1H$  NMR (400 MHz,  $CDCl_3$ ):  $\delta$  8.08-8.04 (m, 2H), 7.89-7.83 (m, 2H), 7.49-7.45 (m, 1H), 7.42-7.34 (m, 3H).  $^{13}C$  NMR (100 MHz,  $CDCl_3$ ):  $\delta$  166.2, 154.0, 135.3, 135.2, 135.1, 130.8, 130.2, 127.4, 126.5, 125.7, 125.6, 123.5, 121.7. HRMS (ESI): Calcd for  $C_{13}H_9ClNS^+ [M+H]^+$  246.0139, found 246.0135.

### 2-(4-chlorophenyl)benzo[d]thiazole (**5h**)

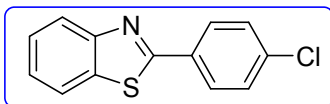

Following the general procedure B, the crude product was purified by silica gel flash chromatography (PE: EA=40:1 as the eluent) to give **5h** (83% yield) as a yellow solid. Mp 120 °C.  $^1H$  NMR (400 MHz,  $CDCl_3$ ):  $\delta$  8.06 (d,  $J = 8.2$  Hz, 1H), 8.01 (d,  $J = 8.5$  Hz, 2H), 7.88 (d,  $J = 8.0$  Hz, 1H), 7.51-7.44 (m, 3H), 7.38 (t,  $J = 7.6$  Hz, 1H).  $^{13}C$  NMR (100 MHz,  $CDCl_3$ ):  $\delta$  166.60, 154.1, 137.0, 135.1, 132.2, 129.3, 128.7, 126.5, 125.4, 123.3, 121.7. HRMS (ESI): Calcd for  $C_{13}H_9ClNS^+ [M+H]^+$  246.0139, found 246.0135.

### 2-(3-bromophenyl)benzo[d]thiazole (**5i**)

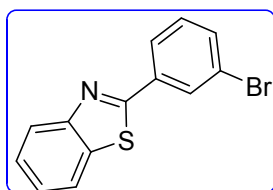

Following the general procedure B, the crude product was purified by silica gel flash chromatography (PE: EA=50:1 as the eluent) to give **5i** (79% yield) as a white solid. Mp 100 °C.  $^1H$  NMR (400 MHz,  $CDCl_3$ ):  $\delta$  8.25 (t,  $J = 1.7$  Hz, 1H), 8.06 (d,  $J = 8.1$  Hz, 1H), 7.95

(d,  $J = 7.8$ , Hz, 1H), 7.87 (d,  $J = 7.7$  Hz, 1H), 7.58 (ddd,  $J = 8.0, 1.7, 0.8$  Hz, 1H), 7.50-7.46 (m, 1H), 7.40 (m, 2H).  $^{13}\text{C}$  NMR (100 MHz,  $\text{CDCl}_3$ ):  $\delta$  165.0, 152.9, 134.4, 134.0, 132.7, 129.4, 129.2, 125.5, 125.1, 124.5, 122.4, 122.1, 120.6. HRMS (ESI): Calcd for  $\text{C}_{13}\text{H}_9\text{BrNS}^+ [\text{M}+\text{H}]^+$  289.9634, found 289.9627.

#### 4-(benzo[d]thiazol-2-yl)benzonitrile (**5j**)

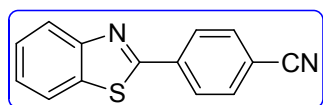

Following the general procedure B, the crude product was purified by silica gel flash chromatography (PE: EA=30:1 as the eluent) to give **5j** (54% yield) as a white solid.  $^1\text{H}$  NMR (400 MHz,  $\text{CDCl}_3$ ):  $\delta$  9.01 (s, 1H), 8.21 (d,  $J = 8.4$  Hz, 1H), 8.15 (d,  $J = 8.2$  Hz, 1H), 8.12 (d,  $J = 8.2$  Hz, 1H), 7.99-7.94 (m, 1H), 7.79 (d,  $J = 8.4$  Hz, 1H), 7.56-7.51 (m, 1H), 7.45 (t,  $J = 7.5$  Hz, 1H).  $^{13}\text{C}$  NMR (100 MHz,  $\text{CDCl}_3$ ):  $\delta$  153.9, 132.8, 127.9, 126.9, 126.2, 126.1, 125.6, 123.8, 123.7, 121.9, 121.8. HR-MS (ESI): Calcd for  $\text{C}_{14}\text{H}_9\text{N}_2\text{S}^+ [\text{M}+\text{H}]^+$  requires 237.0481; found 237.0485.

#### 2-(6-methoxynaphthalen-2-yl)benzo[d]thiazole (**5k**)

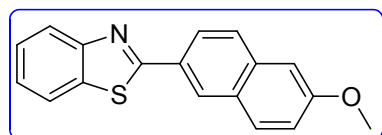

Following the general procedure B, the crude product was purified by silica gel flash chromatography (PE: EA=30:1 as the eluent) to give **5k** (94% yield) as a white solid.  $^1\text{H}$  NMR (400 MHz,  $\text{DMSO}-d_6$ ):  $\delta$  8.61 (s, 1H), 8.17-8.15 (m, 2H), 8.07 (d,  $J = 8.5$  Hz, 2H), 7.98 (d,  $J = 8.6$  Hz, 1H), 7.55 (t,  $J = 7.3$  Hz, 1H), 7.46 (t,  $J = 7.7$  Hz, 1H), 7.42 (s, 1H), 7.27 (dd,  $J = 8.9, 1.6$  Hz, 1H), 3.91 (s, 3H).  $^{13}\text{C}$  NMR (100 MHz,  $\text{DMSO}-d_6$ ):  $\delta$  167.5, 158.8, 153.7, 135.8, 134.4, 130.5, 128.2, 128.1, 127.8, 127.2, 126.6, 125.4, 124.5, 122.7, 122.3, 119.7, 106.2, 55.4. HRMS (ESI): Calcd for  $\text{C}_{18}\text{H}_{14}\text{NOS}^+ [\text{M}+\text{H}]^+$  292.0791, found 292.0789.



### 2-(naphthalen-2-yl)benzo[d]thiazole (**5l**)

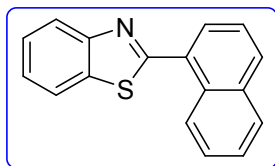

Following the general procedure B, the crude product was purified by silica gel flash chromatography (PE: EA=30:1 as the eluent) to give **5l** (87% yield) as a white solid. Mp 126 °C.

$^1\text{H}$  NMR (400 MHz,  $\text{CDCl}_3$ ):  $\delta$  8.55 (s, 1H), 8.20 (dd,  $J$  = 8.5, 1.6 Hz, 1H), 8.11 (d,  $J$  = 8.1 Hz, 1H), 7.96-7.85 (m, 4H), 7.54-7.48 (m, 3H), 7.38 (t,  $J$  = 7.3 Hz, 1H).  $^{13}\text{C}$  NMR (100 MHz,  $\text{CDCl}_3$ ):  $\delta$  167.1, 153.2, 134.1, 133.6, 132.1, 129.9, 127.8, 127.8, 126.8, 126.5, 126.4, 125.8, 125.3, 124.2, 123.4, 122.2, 120.6. HRMS (ESI): Calcd for  $\text{C}_{17}\text{H}_{12}\text{NS}^+ [\text{M}+\text{H}]^+$  262.0685, found 262.0684.

### 2-(thiophen-2-yl)benzo[d]thiazole (**5m**)

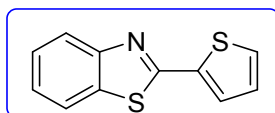

Following the general procedure B, the crude product was purified by silica gel flash chromatography (PE: EA=40:1 as the eluent) to give **5m** (75% yield) as a white solid. Mp 99 °C.

$^1\text{H}$  NMR (400 MHz,  $\text{CDCl}_3$ ):  $\delta$  8.02 (d,  $J$  = 8.2 Hz, 1H), 7.83 (d,  $J$  = 7.9 Hz, 1H), 7.64 (d,  $J$  = 3.7 Hz, 1H), 7.47 (dd,  $J$  = 13.4, 5.1 Hz, 2H), 7.35 (t,  $J$  = 7.9 Hz, 1H), 7.13-7.11 (m, 1H).  $^{13}\text{C}$  NMR (100 MHz,  $\text{CDCl}_3$ ):  $\delta$  161.4, 153.7, 137.4, 134.7, 129.3, 128.6, 128.0, 126.4, 125.2, 123.0, 121.5. HRMS (ESI): Calcd for  $\text{C}_{11}\text{H}_8\text{NS}_2^+ [\text{M}+\text{H}]^+$  218.0093, found 218.0089

### 2-isopropylbenzo[d]thiazole (**5n**)

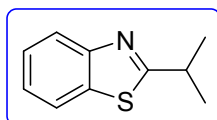

Following the general procedure B, the crude product was purified by silica gel flash chromatography (PE: EA=40:1 as the eluent) to give **5n** (90% yield) as a colorless oil.

$^1\text{H}$  NMR (400 MHz,  $\text{CDCl}_3$ ):  $\delta$  7.98 (d,  $J$  = 8.1 Hz, 1H), 7.83 (d,  $J$  = 8.0 Hz, 1H), 7.44 (t,  $J$  = 7.4 Hz, 1H), 7.32 (t,  $J$  = 7.4 Hz, 1H), 3.47-3.36 (m, 1H), 1.48 (d,  $J$  = 6.9 Hz, 6H).  $^{13}\text{C}$  NMR (100

MHz, CDCl<sub>3</sub>):  $\delta$  178.6, 153.2, 134.7, 125.8, 124.6, 122.6, 121.6, 34.1, 22.9. HRMS (ESI): Calcd for C<sub>10</sub>H<sub>12</sub>NS<sup>+</sup> [M+H]<sup>+</sup> 178.0685, found 178.0685

### 2-cyclohexylbenzo[d]thiazole (5o)

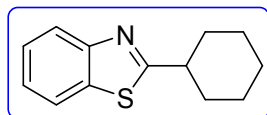

Following the general procedure B, the crude product was purified by silica gel flash chromatography (PE: EA=30:1 as the eluent) to give **5o** (91% yield) as a colorless oil. <sup>1</sup>H NMR (400 MHz, CDCl<sub>3</sub>):  $\delta$  7.97 (d,  $J$  = 8.1 Hz, 1H), 7.83 (d,  $J$  = 7.9 Hz, 1H), 7.43 (td,  $J$  = 8.0, 0.64 Hz, 1H), 7.31 (t,  $J$  = 7.9 Hz, 1H), 3.10 (tt,  $J$  = 11.6, 3.4 Hz, 1H), 2.19 (d,  $J$  = 11.8 Hz, 2H), 1.89 (dt,  $J$  = 13, 2.9 Hz, 2H), 1.77-1.74 (m, 1H), 1.64 (qd,  $J$  = 12.36, 2.9 Hz, 2H) 1.44 (qt,  $J$  = 12.8, 3.2 Hz, 2H), 1.31 (qt,  $J$  = 12.4, 2.8 Hz, 1H) <sup>13</sup>C NMR (400 MHz, CDCl<sub>3</sub>):  $\delta$  177.6, 153.1, 134.6, 125.8, 124.5, 122.6, 121.6, 43.5, 33.4, 26.1, 25.8. HRMS (ESI): Calcd for C<sub>14</sub>H<sub>18</sub>NS<sup>+</sup> [M+H]<sup>+</sup> 218.0998, found 218.0998.

### 2-benzylbenzo[d]thiazole (5p)

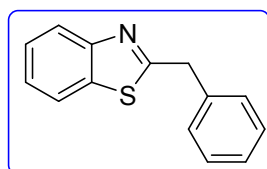

Following the general procedure B, the crude product was purified by silica gel flash chromatography (PE: EA=30:1 as the eluent) to give **5p** (84% yield) as a colorless oil. <sup>1</sup>H NMR (400 MHz, CDCl<sub>3</sub>):  $\delta$  7.99 (d,  $J$  = 8.16 Hz, 1H), 7.76 (d,  $J$  = 7.96 Hz, 1H), 7.43 (t,  $J$  = 7.6 Hz, 1H), 7.37-7.27 (m, 6H), 7.42 (s, 2H). <sup>13</sup>C NMR (400 MHz, CDCl<sub>3</sub>):  $\delta$  171.2, 153.3, 137.2, 135.7, 129.2, 128.9, 127.4, 126.0, 124.8, 122.8, 121.6, 40.7. HRMS (ESI): Calcd for C<sub>14</sub>H<sub>12</sub>NOS<sup>+</sup> [M+H]<sup>+</sup> 226.0685, found 226.0686.

### III. Scale-up Synthesis and Synthetic Applications

#### a) Scale-up Synthesis

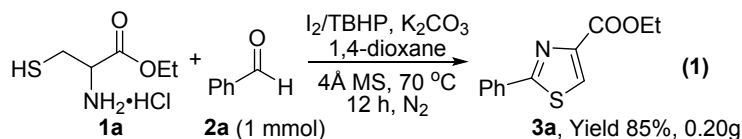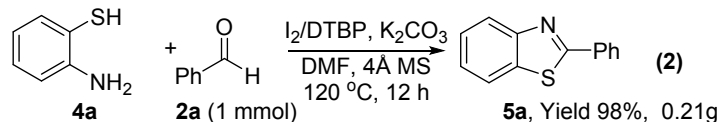

A mixture of L-cysteine ethyl ester hydrochloride (4 mmol, 0.743 g, 4.0 equiv.), benzaldehyde (1 mmol, 0.106 g, 1.0 equiv.), potassium carbonate (Na<sub>2</sub>CO<sub>3</sub>, 3 mmol, 0.414 g, 3.0 equiv.), iodine (I<sub>2</sub>, 0.3 mmol, 0.076 g, 0.3 equiv.), and molecular sieve (MS, 2g) in 5 mL 1,4-dioxane in a schlenk tube, tert-butyl hydroperoxide (TBHP, 70% in cyclohexane, 4 mmol, 0.5145 g, 4 equiv.) was added slowly to the mixture at room temperature under nitrogen atmosphere, then the mixture was stirred at 70 °C for 12 hours. The resultant solution was quenched with saturated sodium thiosulfate (4 mL) and extracted with ethyl acetate (3×30 mL), the organic phase was combined and washed with brine (3×30 mL), dried over anhydrous sodium sulfate, filtered and concentrated in vacuo. the crude product was purified by silica gel flash chromatography (PE: EA=25:1 as the eluent) to give **3a** (85% yield) as a yellow oil.

A mixture of 2-aminothiophenol (4 mmol, 0.54 g, 4.0 equiv.), benzaldehyde (1 mmol, 0.053 g, 1.0 equiv.), potassium carbonate (K<sub>2</sub>CO<sub>3</sub>, 3 mmol, 0.414 g, 3.0 equiv.), iodine (0.3 mmol, 0.076 g, 0.3 equiv.), and molecular sieve (2 g) in 1 mL N, N-dimethylformamide (DMF) in a pressure bottle, di-t-butyl peroxide (DTBP, 4 mmol, 0.5845 g, 4 equiv.) was added slowly to the mixture at room temperature, then the mixture was stirred at 120 °C for 12 hours. The resultant solution was quenched with saturated sodium thiosulfate (4 mL) and extracted with ethyl acetate (3×30 mL), the organic phase was combined and washed with brine (3×30 mL), dried over anhydrous sodium sulfate, filtered and concentrated in vacuo. The crude product was further purified by silica gel flash chromatography (petroleum ether (PE) and ethyl acetate

(EA) as the eluent). the crude product was purified by silica gel flash chromatography (PE: EA=40:1 as the eluent) to give **5a** (98% yield) as a purple solid.

## b) Synthetic Applications

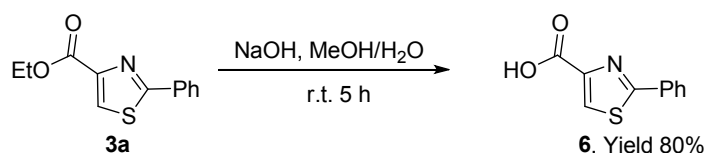

To a solution of **3a** (0.2 mmol, 47 mg, 1 equiv.) in methanol (0.5 mL), sodium hydroxide solution (2 mol/L, 0.2 ml, 2 equiv.) was added at room temperature. The mixture was kept stirring for 5 h. The methanol was removed in vacuo. The resultant mixture was adjusted to pH=5-6 with hydrochloric acid solution (1 mol/L). The solid was filtered and dried to give the product **6** (80%) as a yellow solid. <sup>1</sup>H NMR (400 MHz, DMSO)  $\delta$  13.16 (s, 1H), 8.51 (s, 1H), 8.02-7.96 (m, 2H), 7.59-7.51 (m, 3H). <sup>13</sup>C NMR (100 MHz, DMSO-*d*<sup>6</sup>)  $\delta$  167.88, 162.56, 148.67, 132.97, 131.23, 129.81, 129.23, 126.87. For characterization data, also see: S. N. Thore, S. V. Gupta and K. G. Baheti, *Med. Chem. Res.*, 2013, 22, 3802.

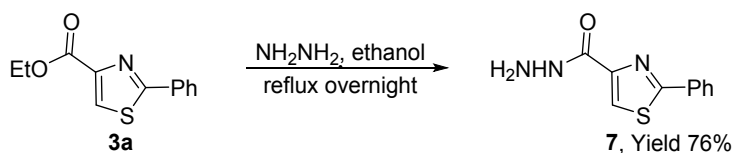

To a solution of **3a** (0.5 mmol, 117 mg, 1 equiv.) in ethanol (2 mL), hydrazine hydrate (NH<sub>2</sub>NH<sub>2</sub>·H<sub>2</sub>O, 1.5 mmol, 89mg, 3 equiv.) was added at room temperature. The mixture was refluxed overnight. The solvent was removed in vacuo, and the crude solid was recrystallized from dichloromethane/ethanol (4:1) to give the product **7** (76%) as a pale yellow solid. <sup>1</sup>H NMR (400 MHz, CDCl<sub>3</sub>)  $\delta$  8.55 (s, 1H), 8.14 (s, 1H), 7.99-7.94 (m, 2H), 7.58-7.45 (m, 3H), 4.14 (s, 2H). <sup>13</sup>C NMR (100 MHz, CDCl<sub>3</sub>)  $\delta$  168.65, 161.83, 149.04, 132.72, 130.77, 129.12, 126.64, 123.13.

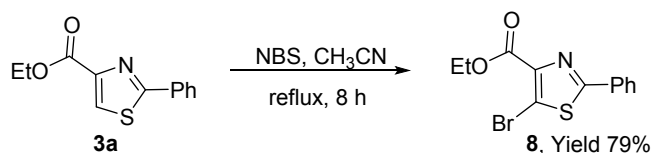

To a solution of **3a** (1 mmol, 0.23 g, 1 equiv.) in acetonitrile (3 mL), N-bromosuccinimide was added (NBS, 2 mmol, 0.36g, 2 equiv.) at room temperature. The mixture was refluxed for 8 h. The reaction was quenched with saturated sodium bicarbonate solution and extracted with ethyl acetate, dried over sodium sulfate, filtered and concentrated in vacuo. The crude product was purified by silica gel flash chromatography (PE:EA=30:1 as the eluent) to give product **8** (79%) as a yellow oil.  $^1\text{H}$  NMR (400 MHz,  $\text{CDCl}_3$ )  $\delta$  7.90-7.96 (m, 2H), 7.53-7.45 (m, 3H), 4.49 (q,  $J = 7.1$  Hz, 2H), 1.47 (t,  $J = 7.1$  Hz, 3H).  $^{13}\text{C}$  NMR (100 MHz,  $\text{CDCl}_3$ )  $\delta$  167.88, 161.13, 144.38, 132.29, 131.08, 129.10, 126.68, 116.35, 61.83, 14.32.

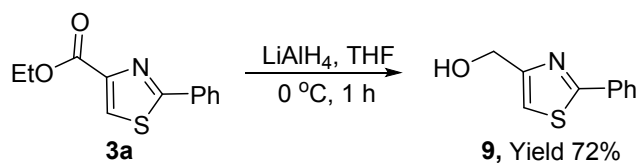

Lithium aluminium hydride (0.2 mmol, 77 mg, 1 equiv.) was dissolved in minimum amount of THF in a schlenk tube and cooled to 0 °C under  $\text{N}_2$  atmosphere. To this was added drop-wise a solution of **3a** (0.14 mmol, 0.032g, 1.4 equiv.) in THF and stirred the reaction mixture for an hour. After completion of reaction, the reaction mixture was quenched with 10% sodium carbonate solution at 0 °C and extracted with ethyl acetate. Organic layers were collected, dried over sodium sulphate and concentrated. The crude product was purified by silica gel flash chromatography (PE:EA=2:1 as the eluent) to give product **9** (72%) as a colorless oil.  $^1\text{H}$  NMR (400 MHz,  $\text{CDCl}_3$ )  $\delta$  7.93-7.91 (m, 2H), 7.43-7.41 (m, 3H), 7.17 (s, 1H), 4.82 (s, 1H), 2.90 (br, 1H).  $^{13}\text{C}$  NMR (100 MHz,  $\text{CDCl}_3$ )  $\delta$  168.9, 157.3, 133.5, 130.2, 129.0, 126.6, 114.6, 61.2.

#### IV. Mechanistic Experiments

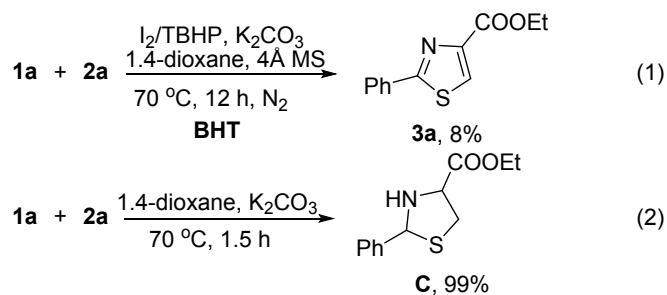

A mixture of L-cysteine ethyl ester hydrochloride (**1a**, 0.8 mmol, 0.1486 g, 4.0 equiv.), benzaldehyde (0.2 mmol, 0.0212 g, 1.0 equiv.), potassium carbonate ( $\text{Na}_2\text{CO}_3$ , 0.6 mmol, 0.0828 g, 3.0 equiv.) in 1 mL 1,4-dioxane in a schlenk tube under nitrogen atmosphere, then the mixture was stirred at 70 °C for 1.5 hours. The resultant solution was extracted with ethyl acetate (3×30 mL), the organic phase was combined and washed with brine (3×30 mL), dried over anhydrous sodium sulfate, filtered and concentrated in vacuo. The crude product was purified by silica gel flash chromatography (PE:EA=10:1 as the eluent) to give product **C** (99%) as a yellow oil. For characterization data of compound **C**, see: C. Saiz, P. Wiof, E. Manta and G. Mahler, *Org. Lett.*, 2009, **11**, 3170.

## V. Spectrum

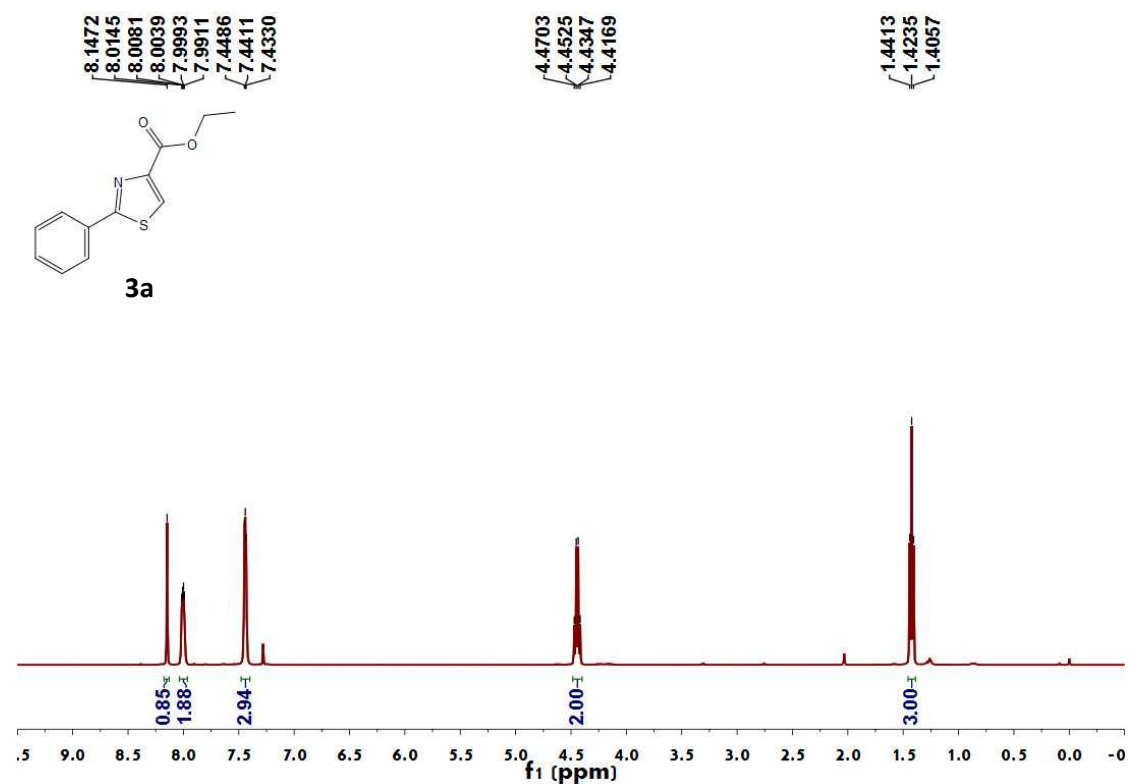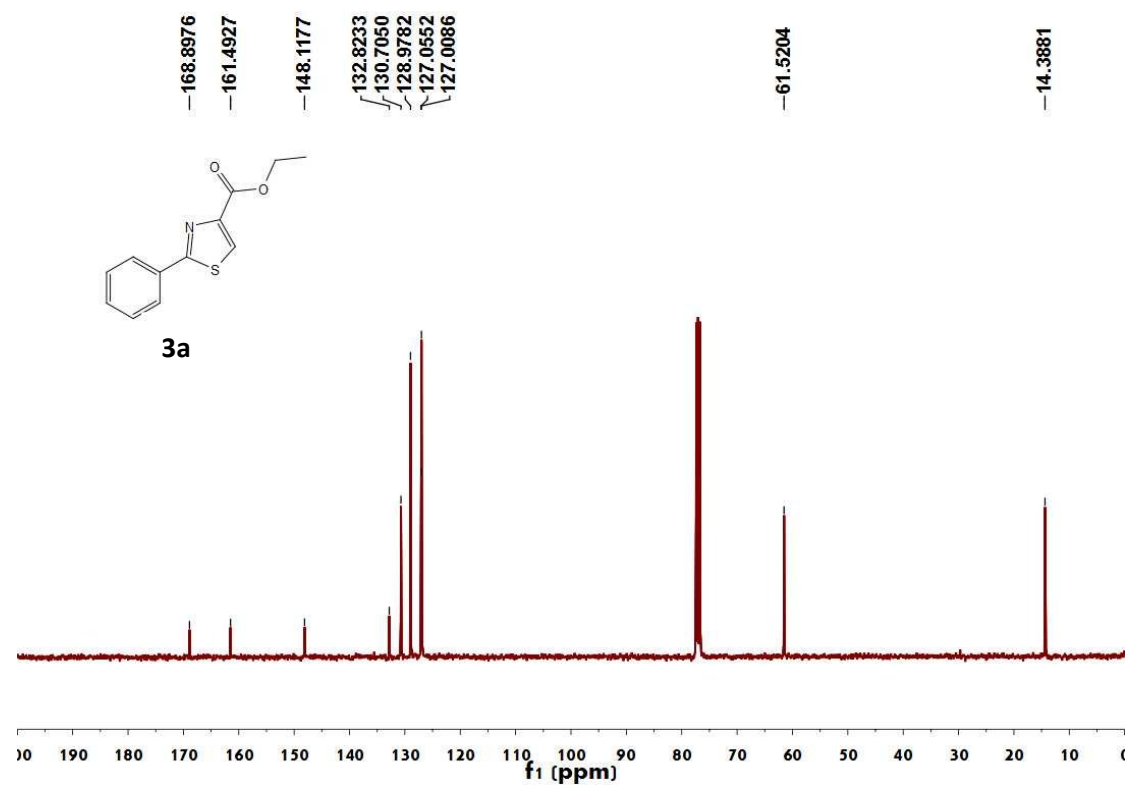

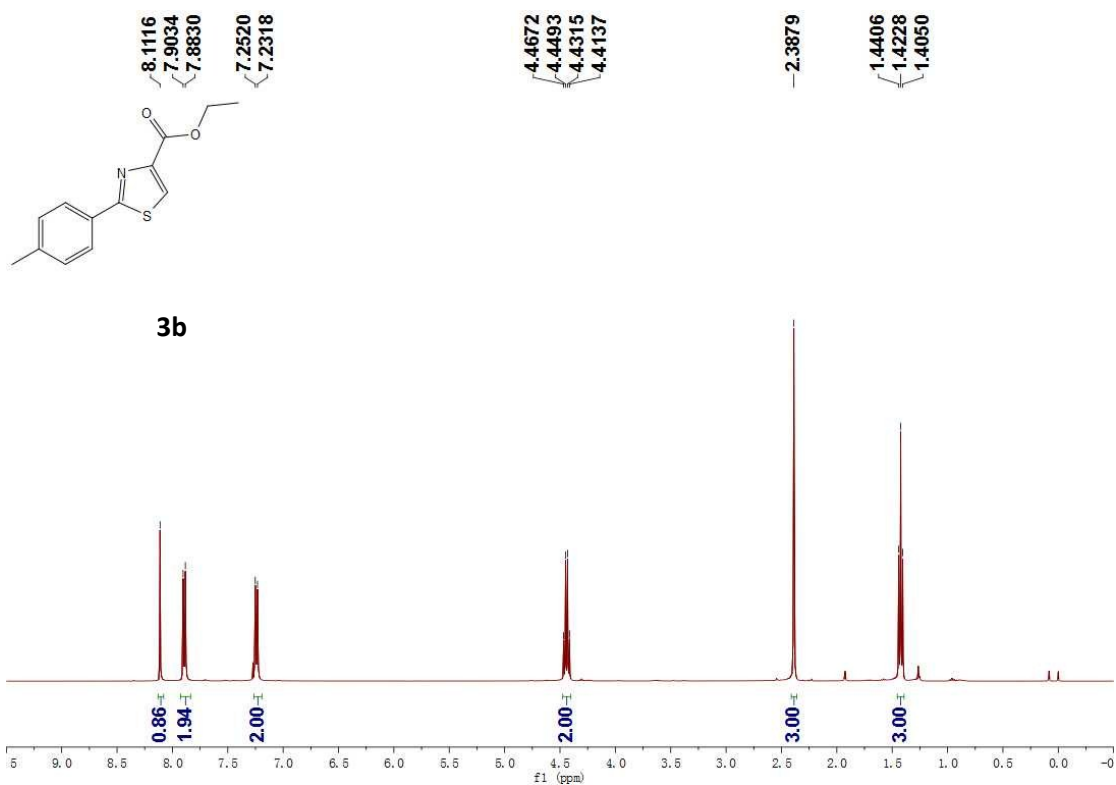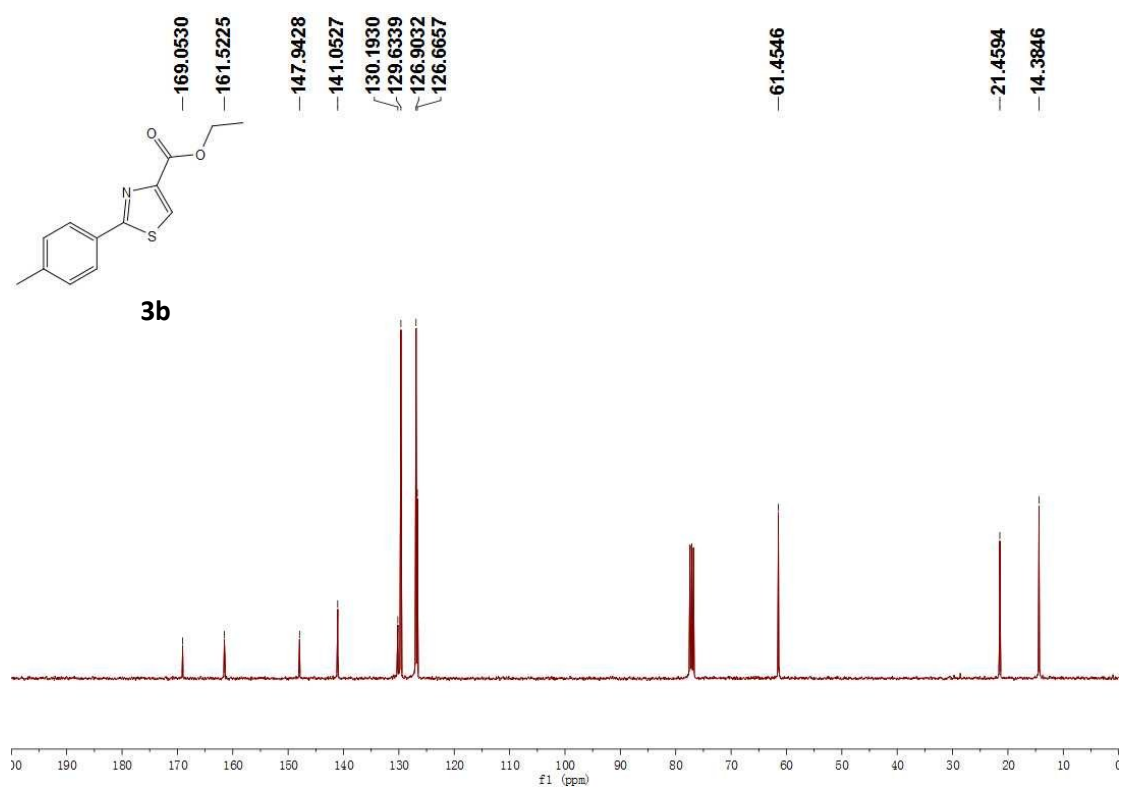



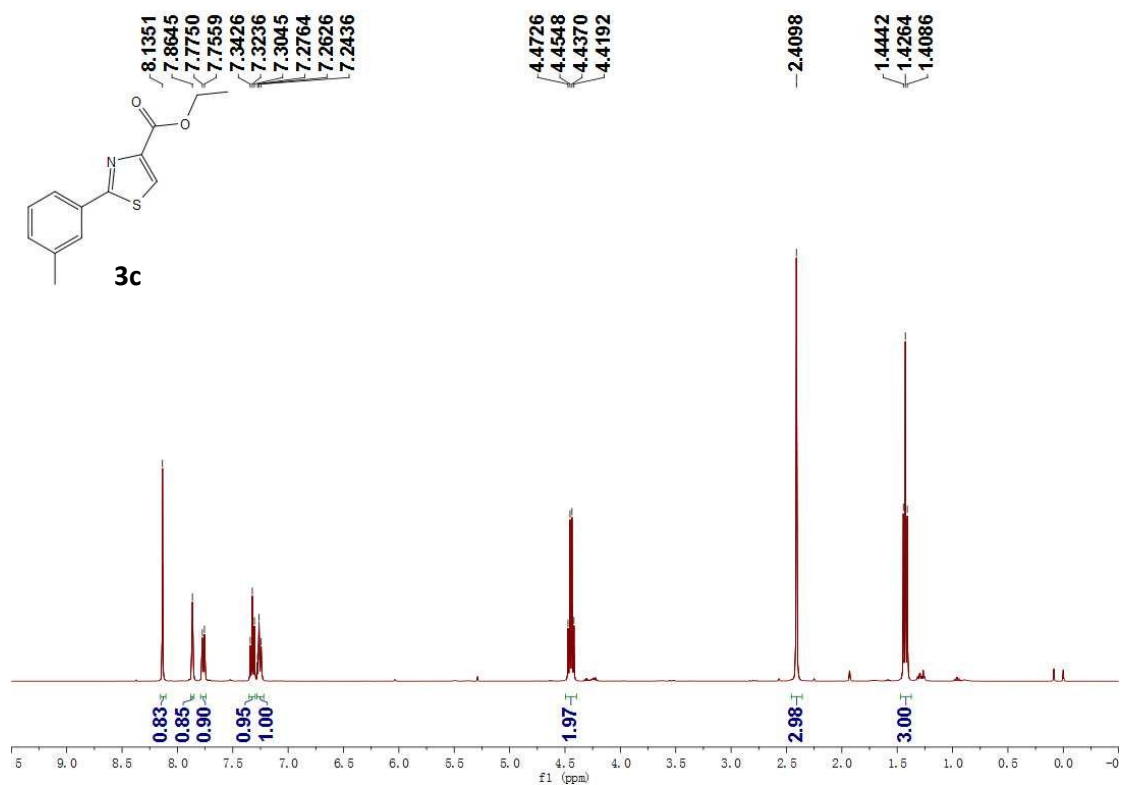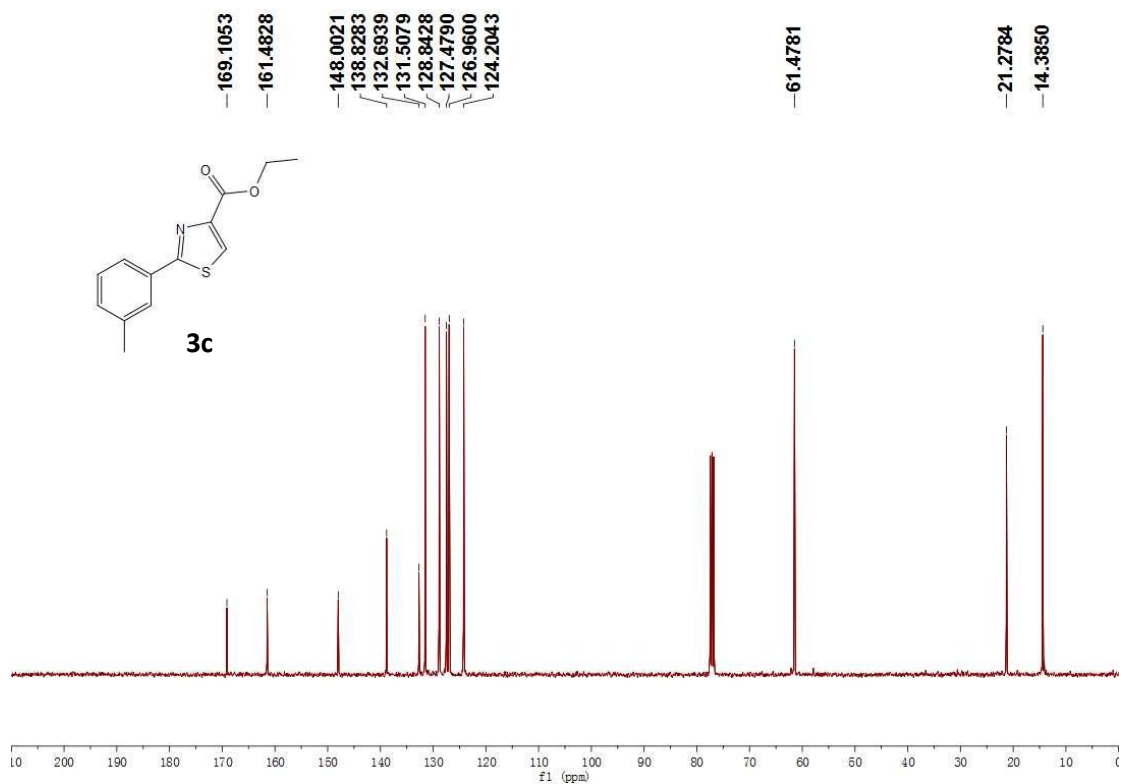

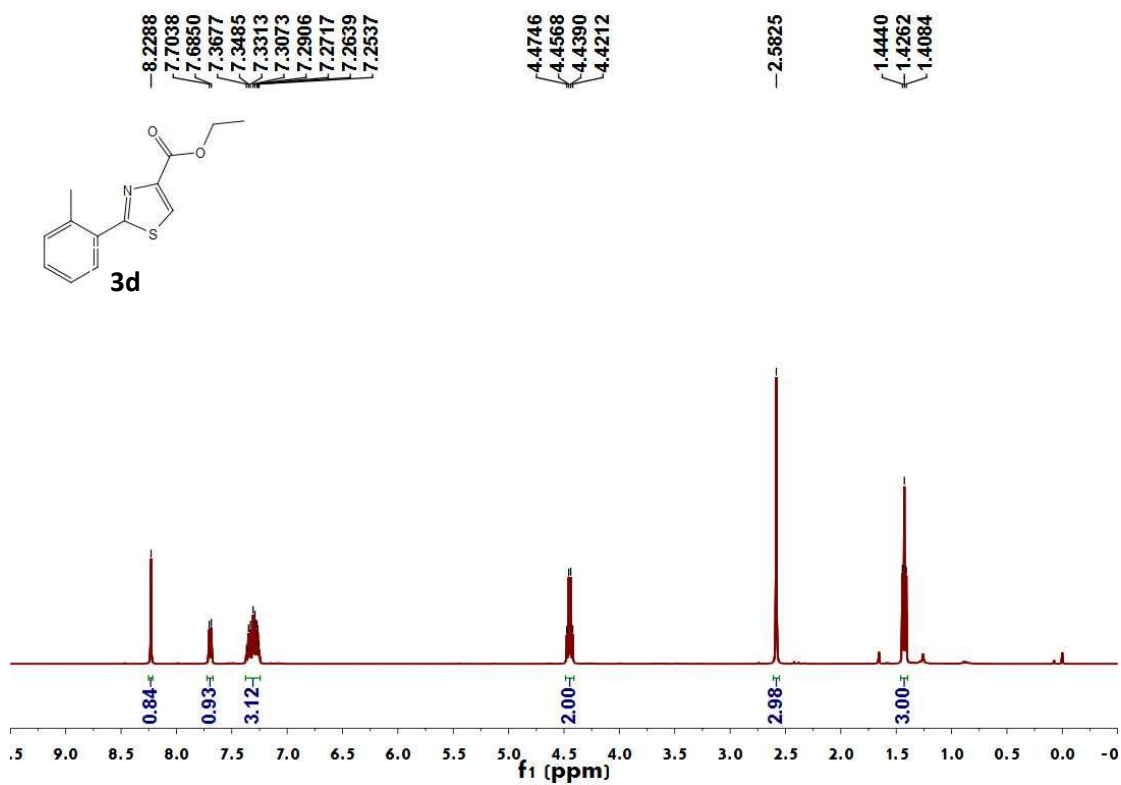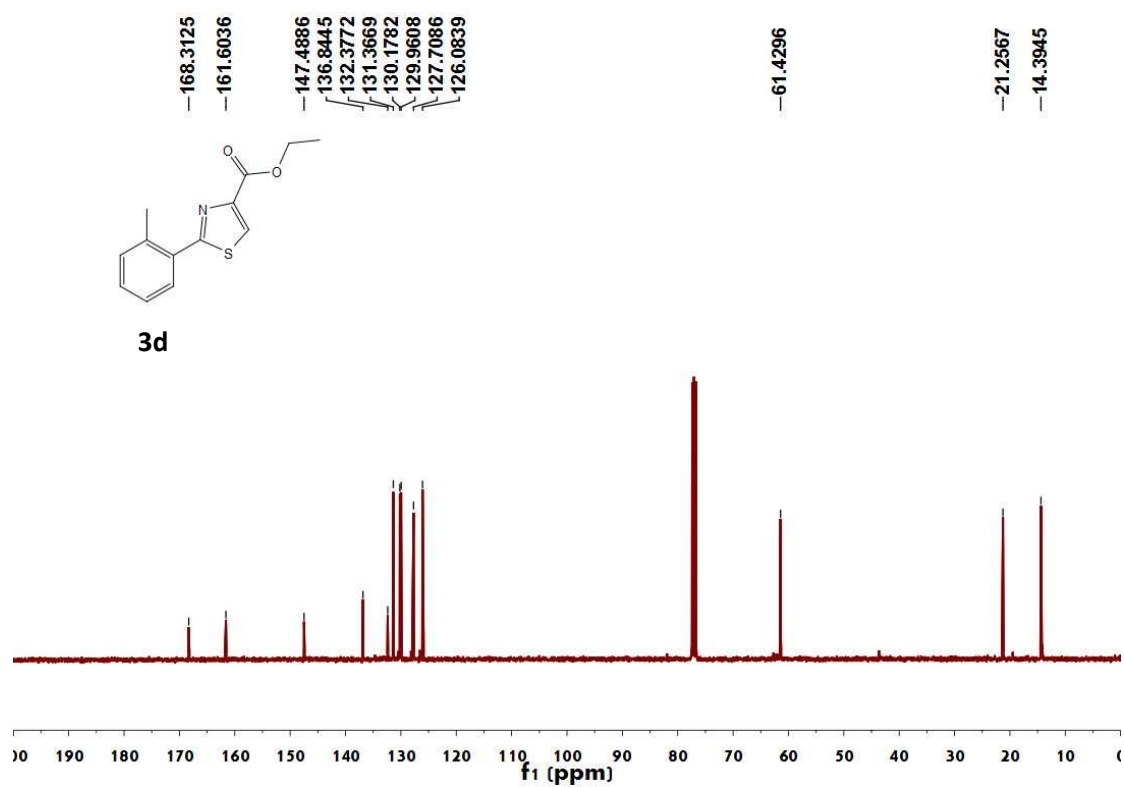

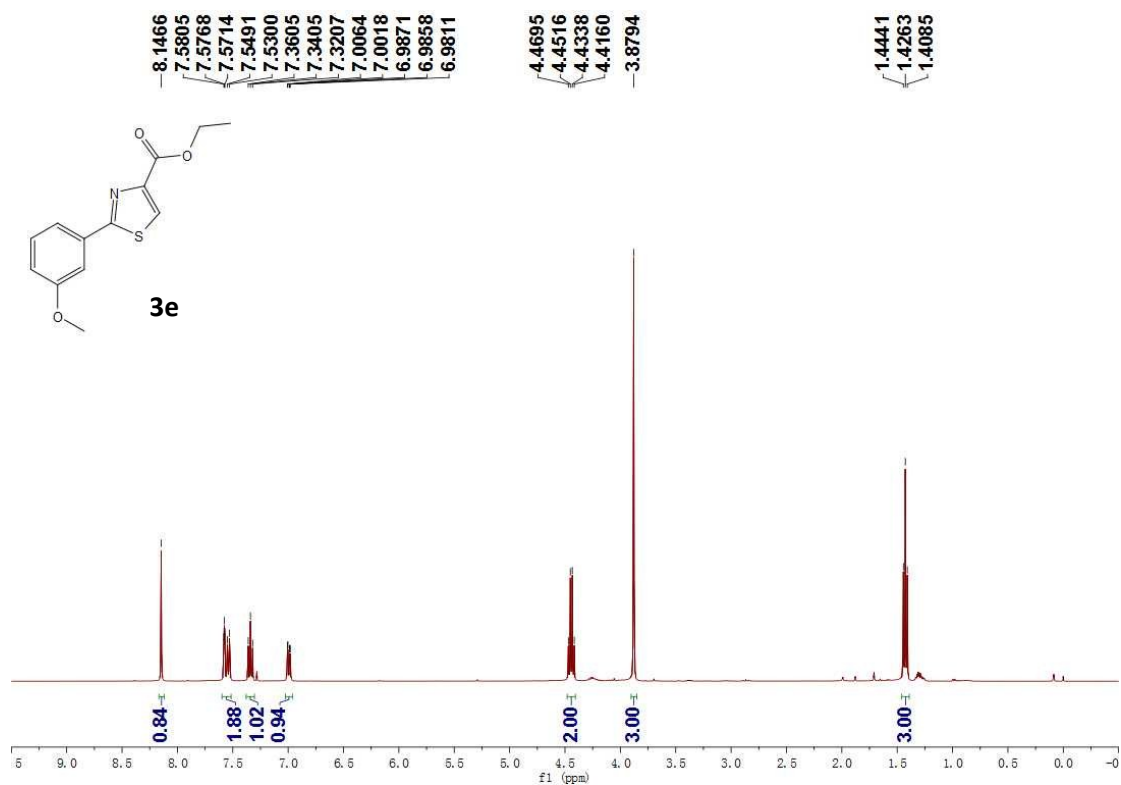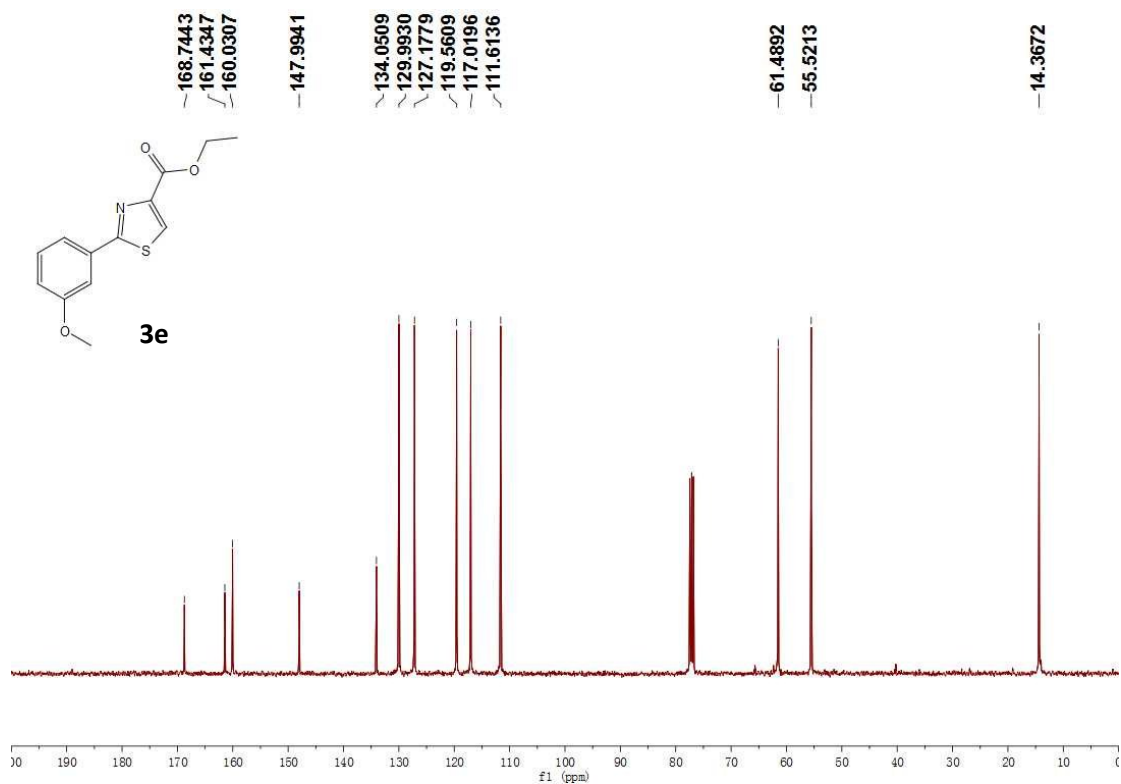

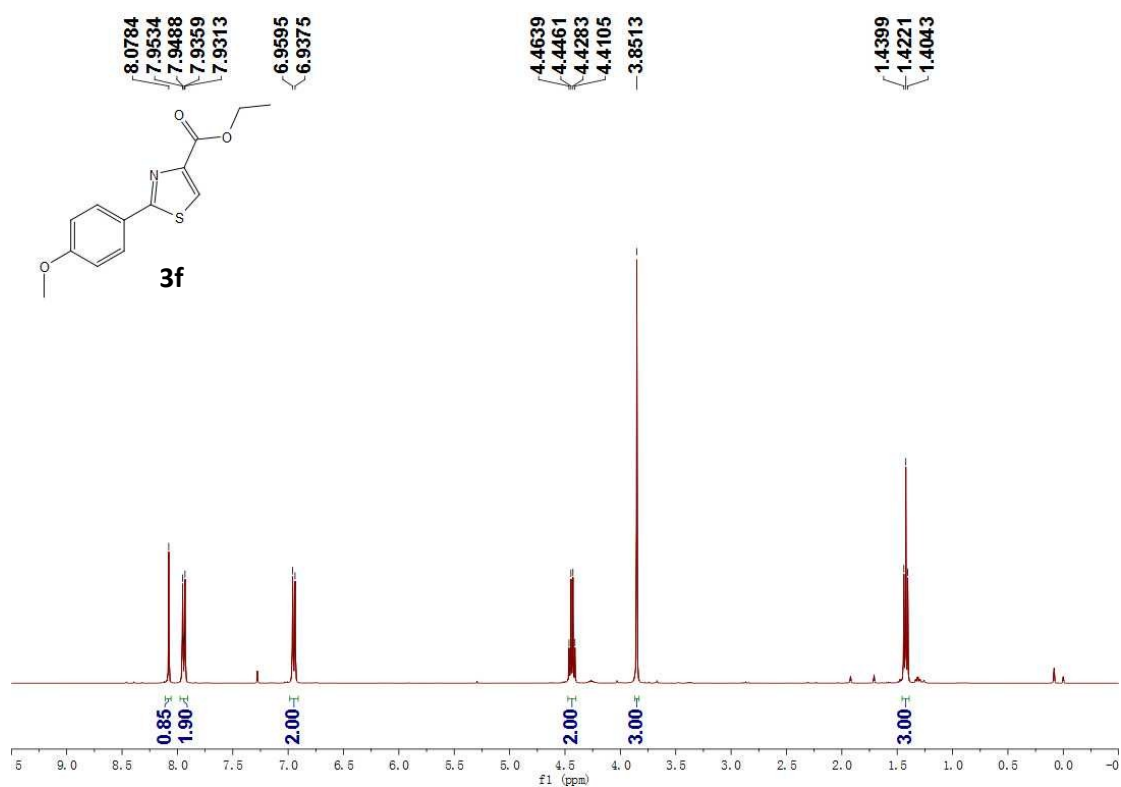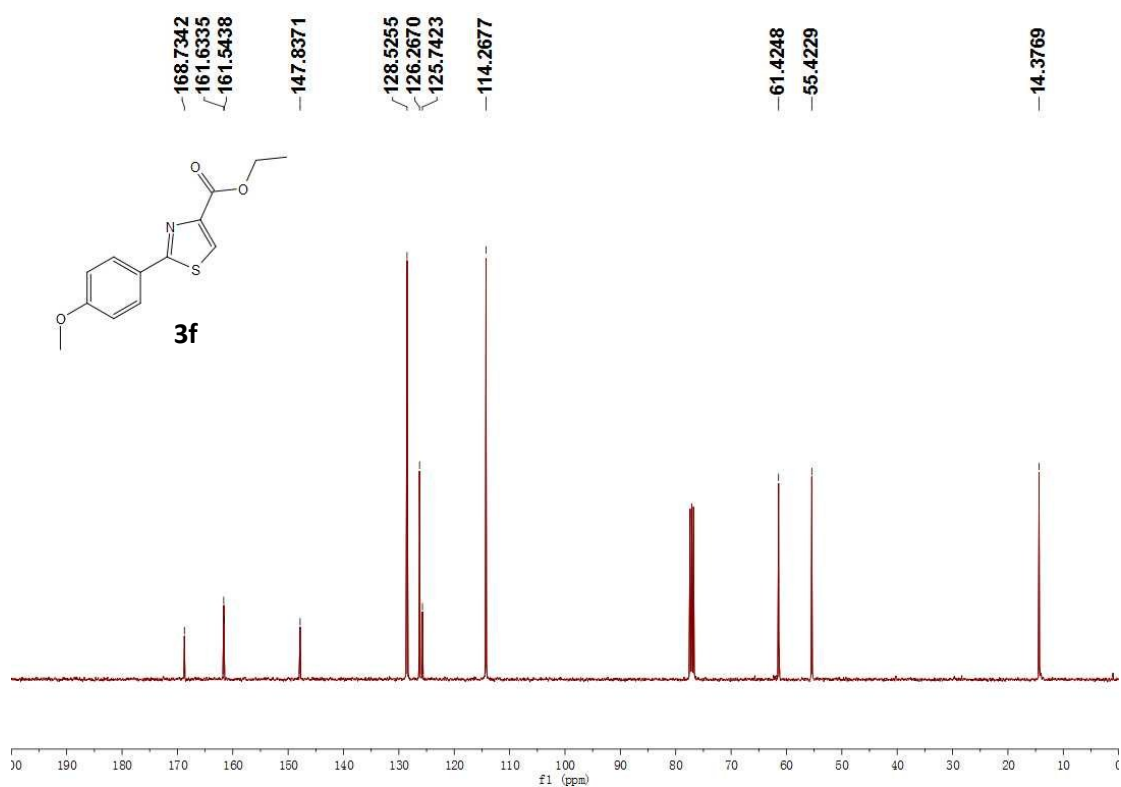

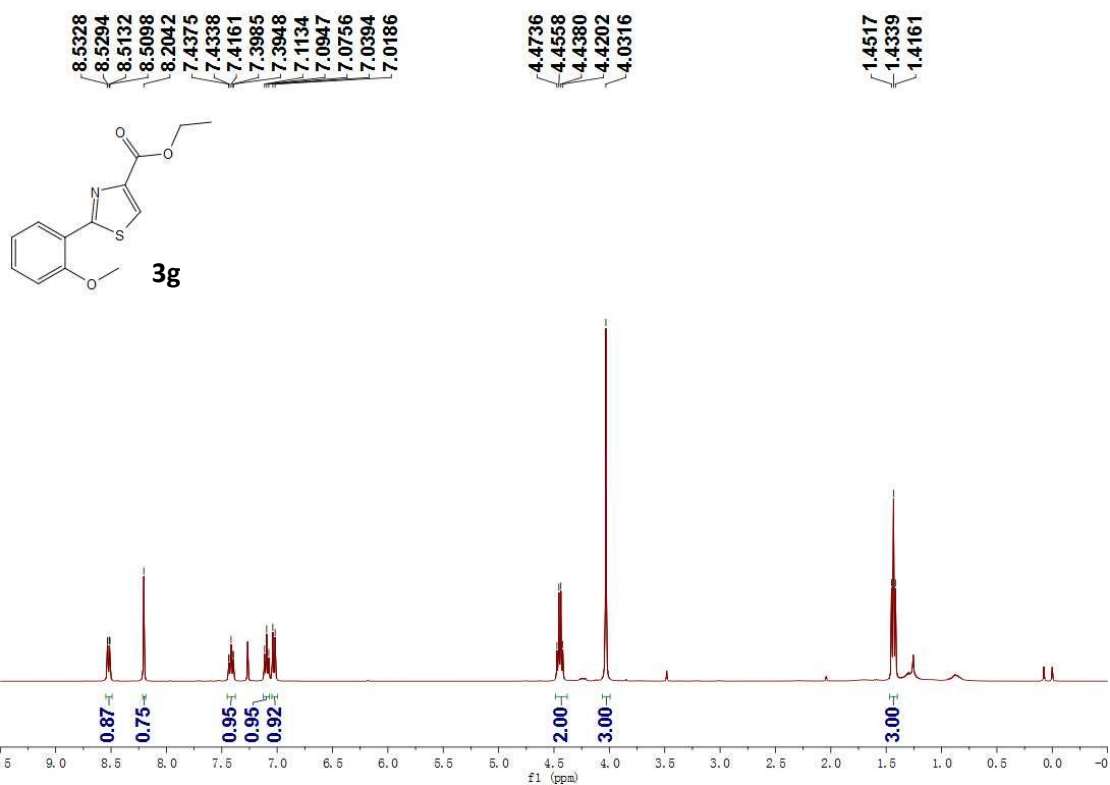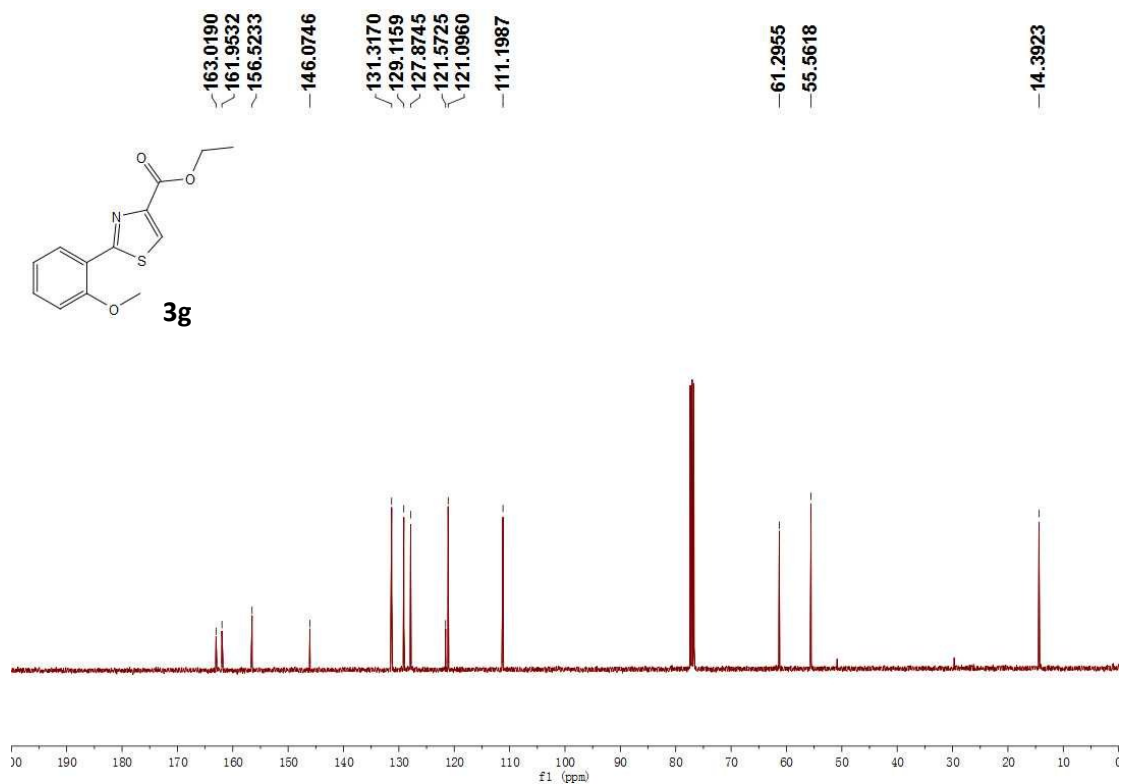

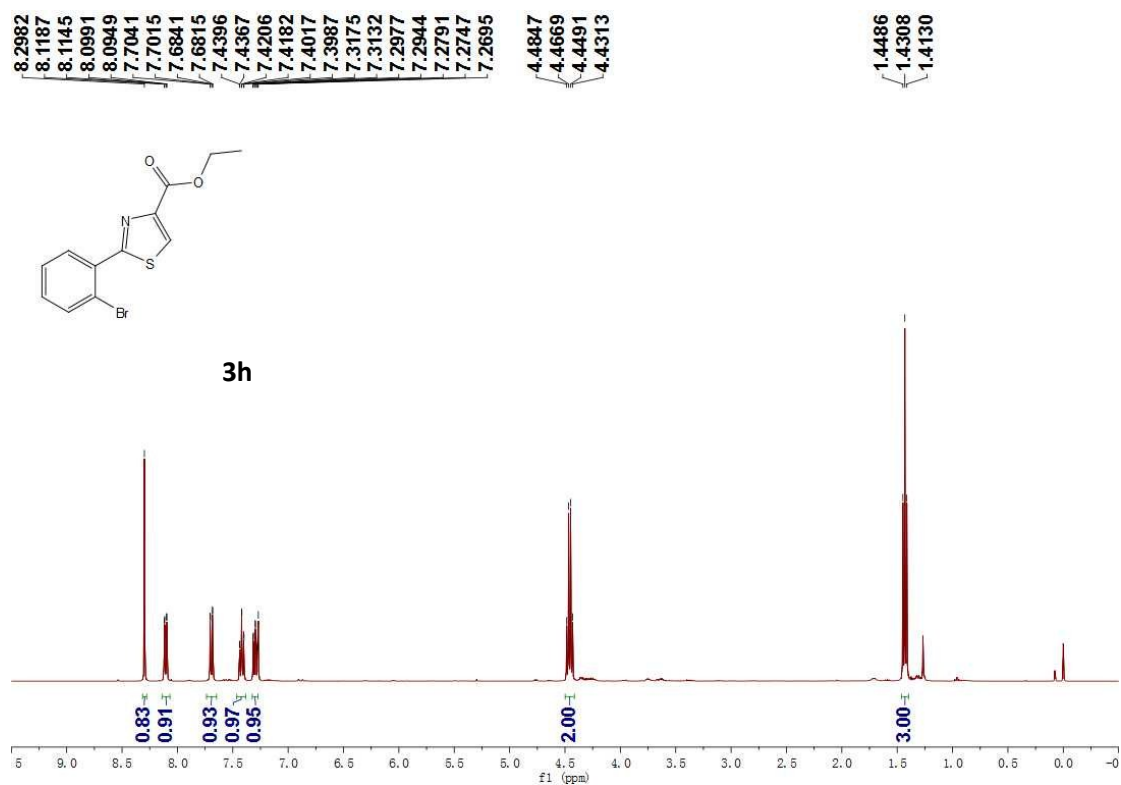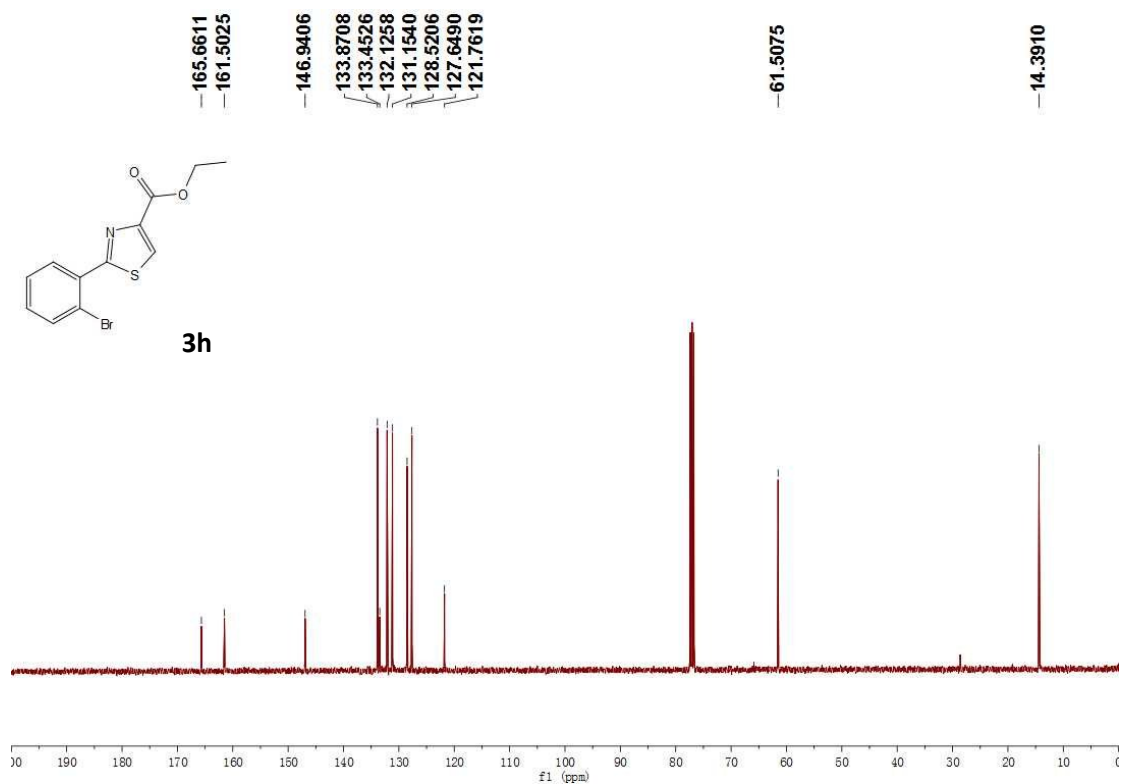

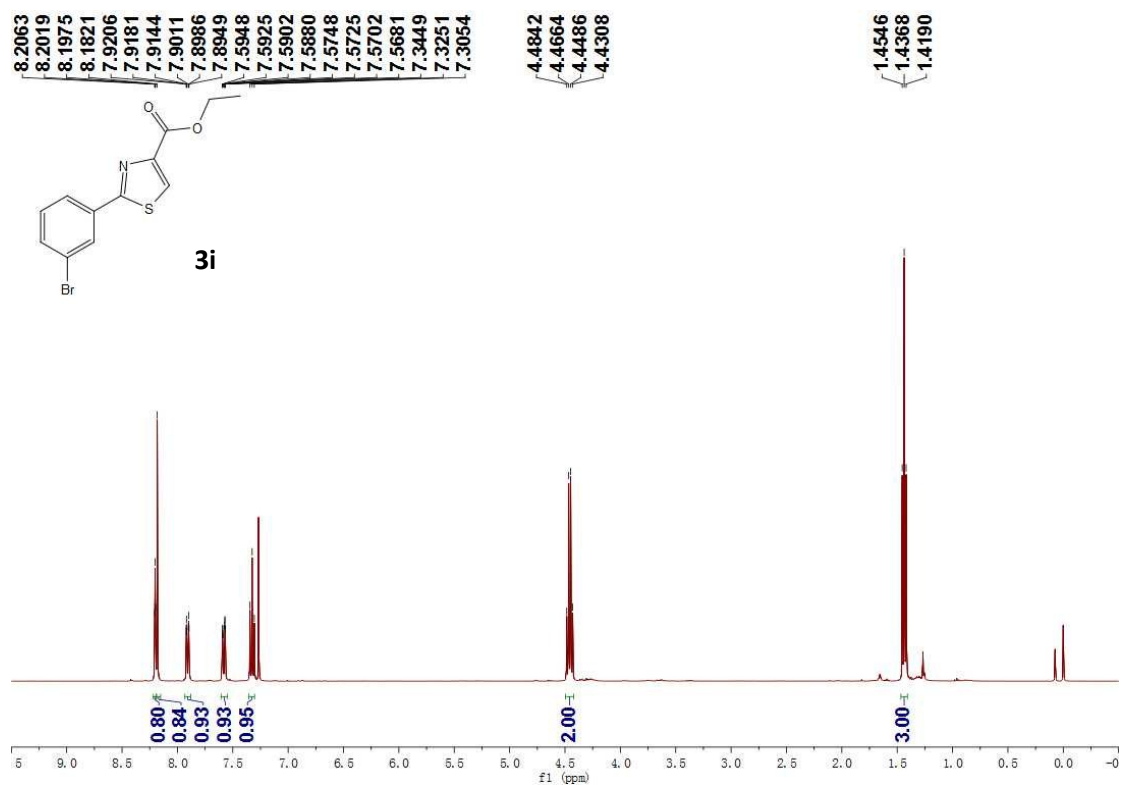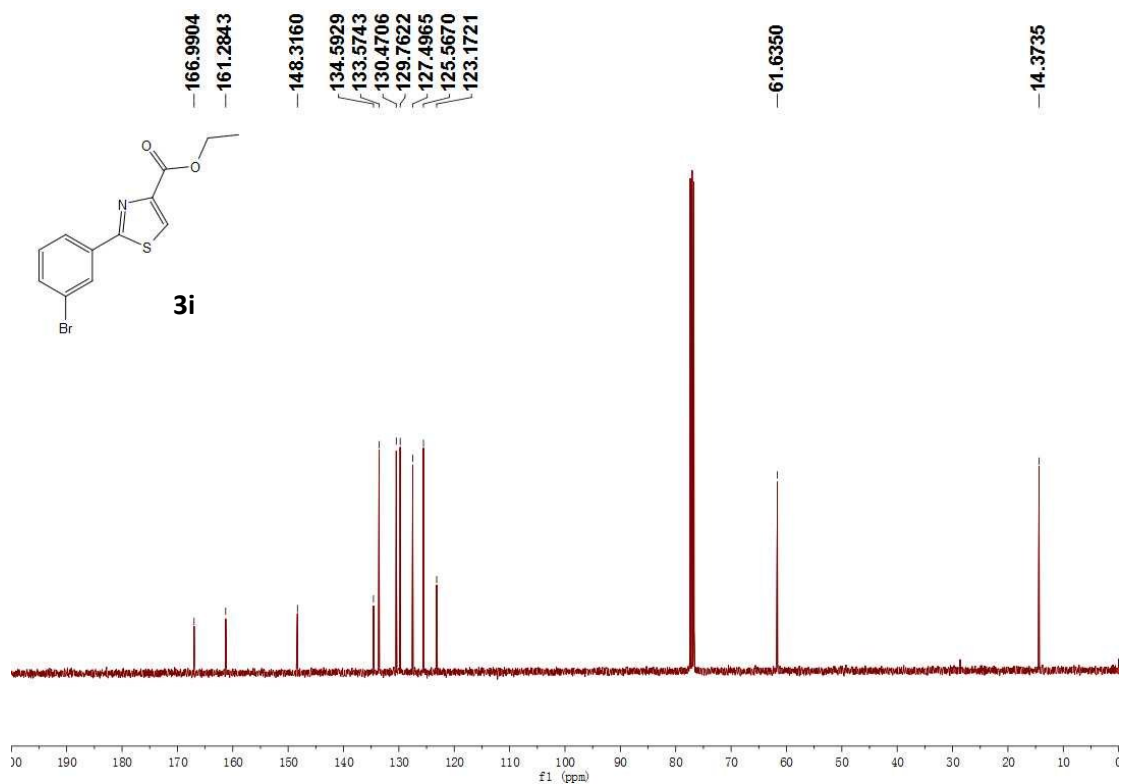

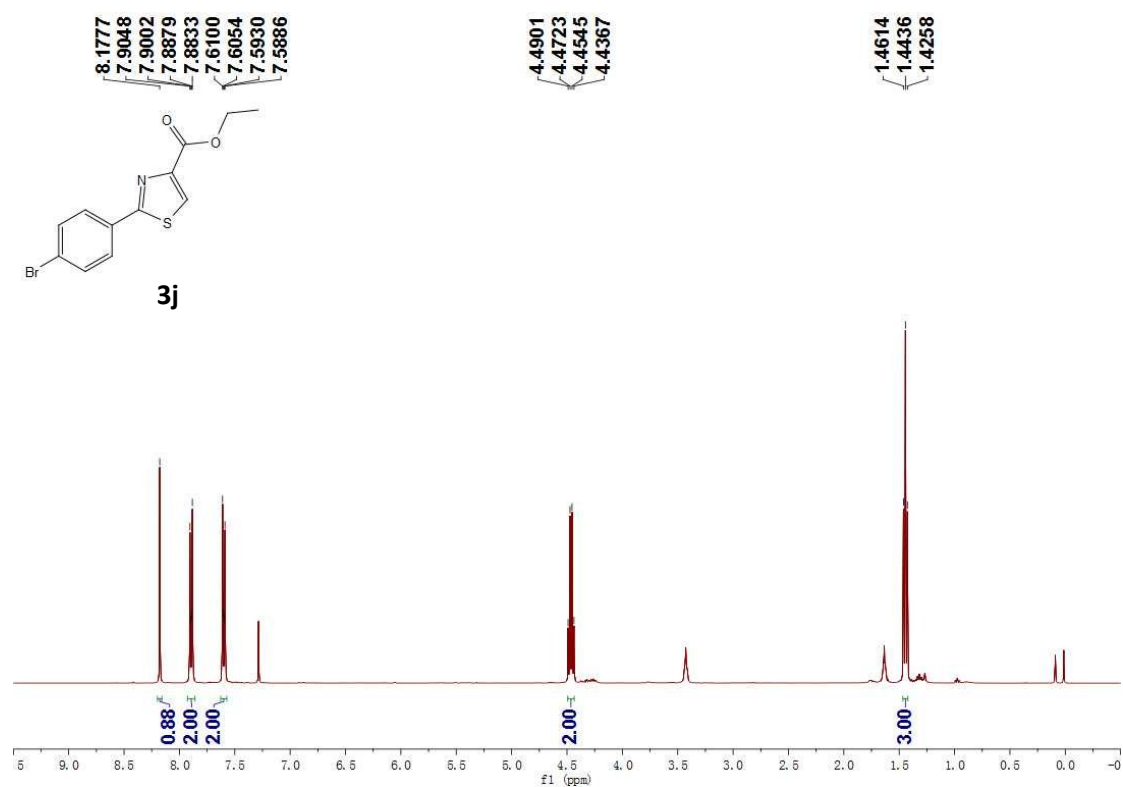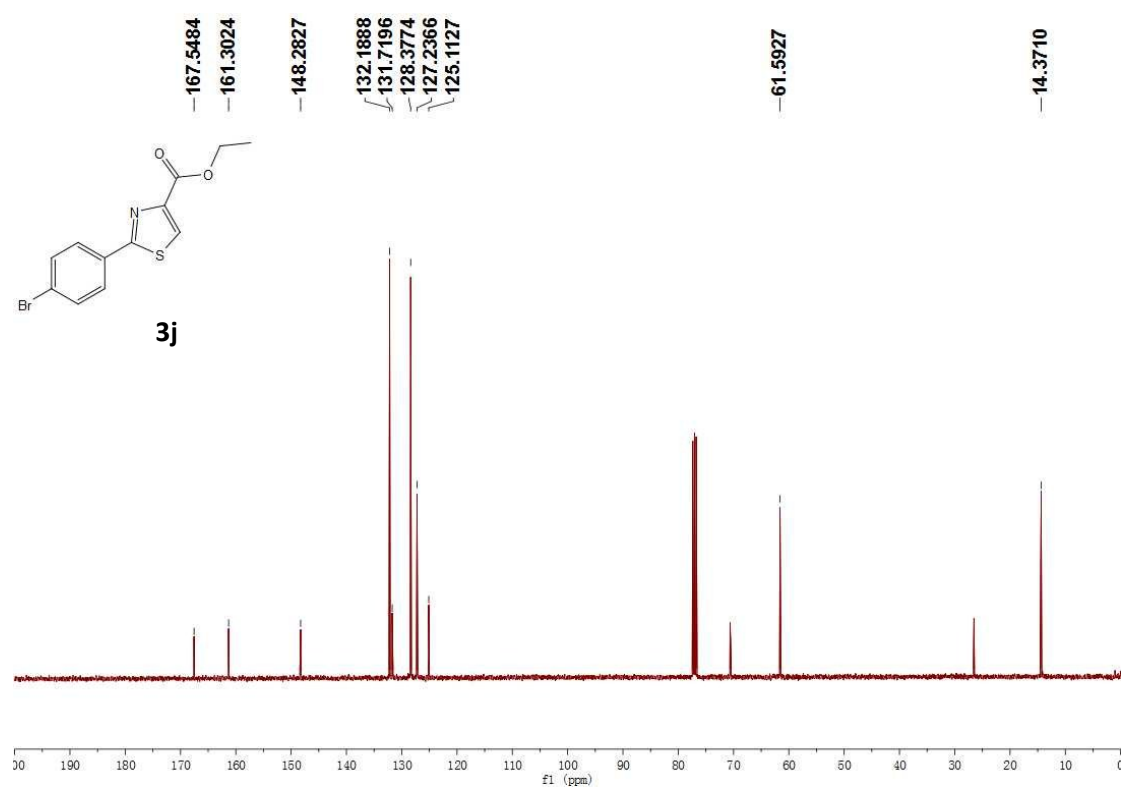



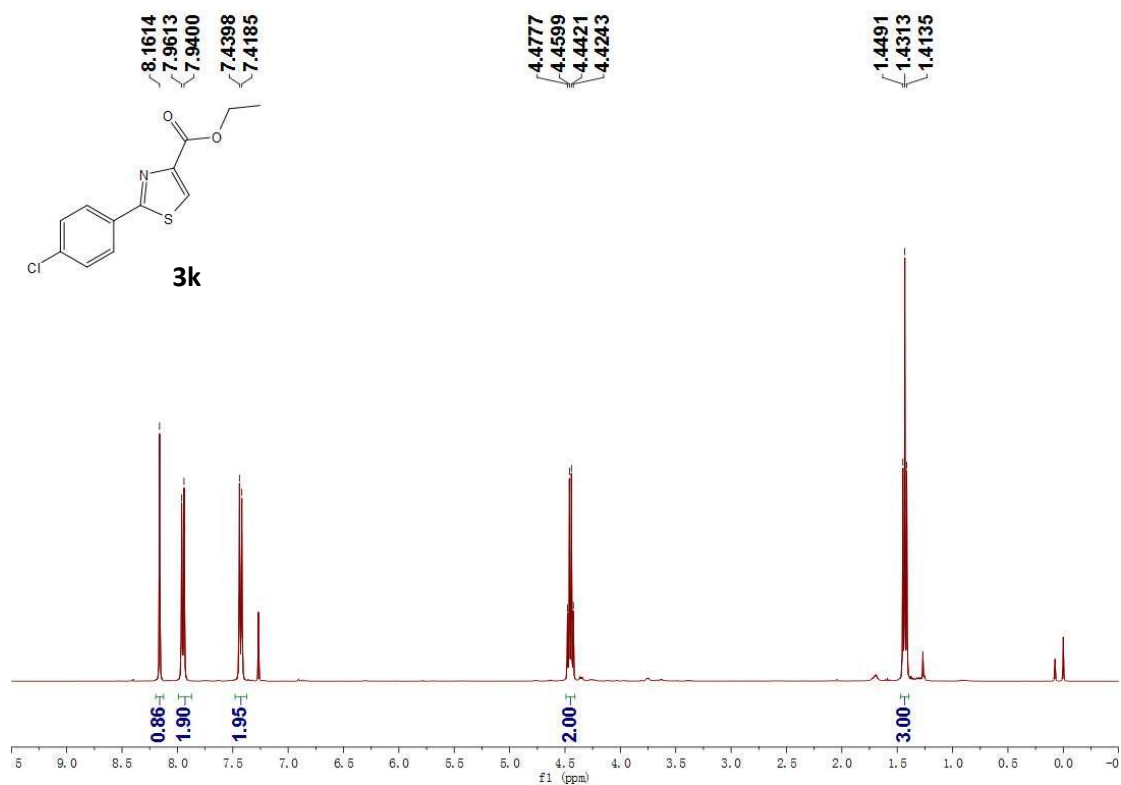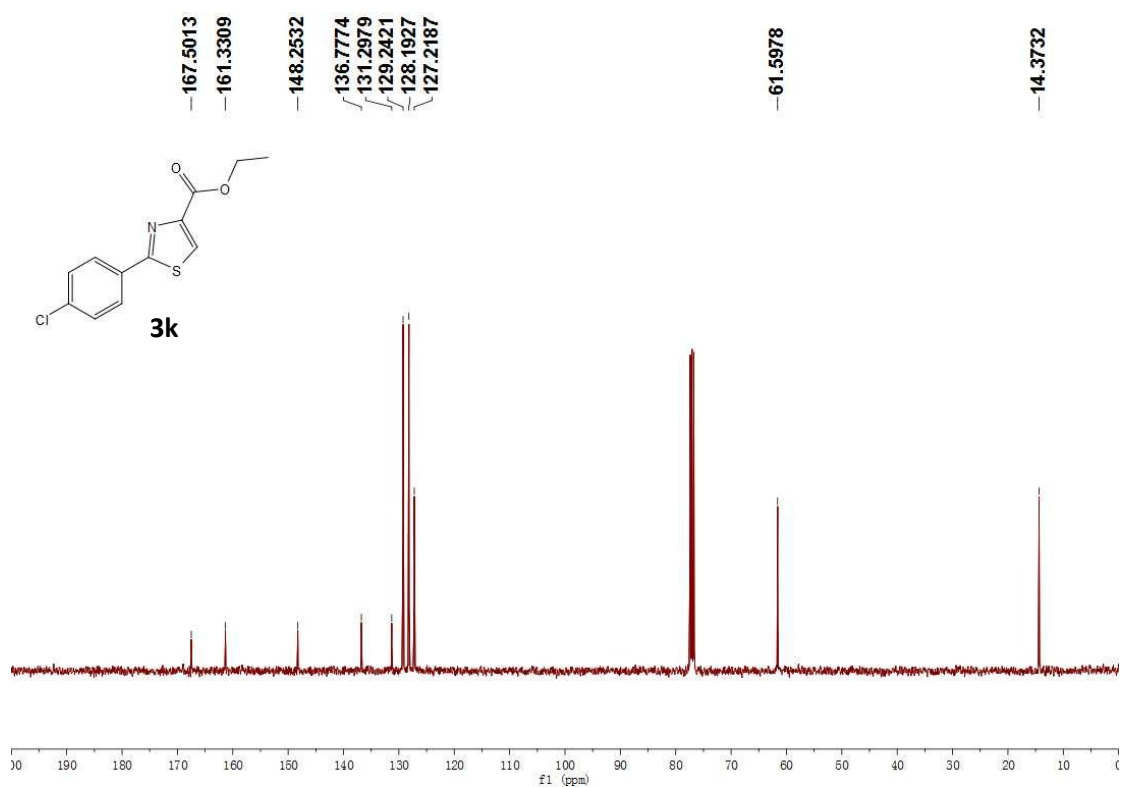

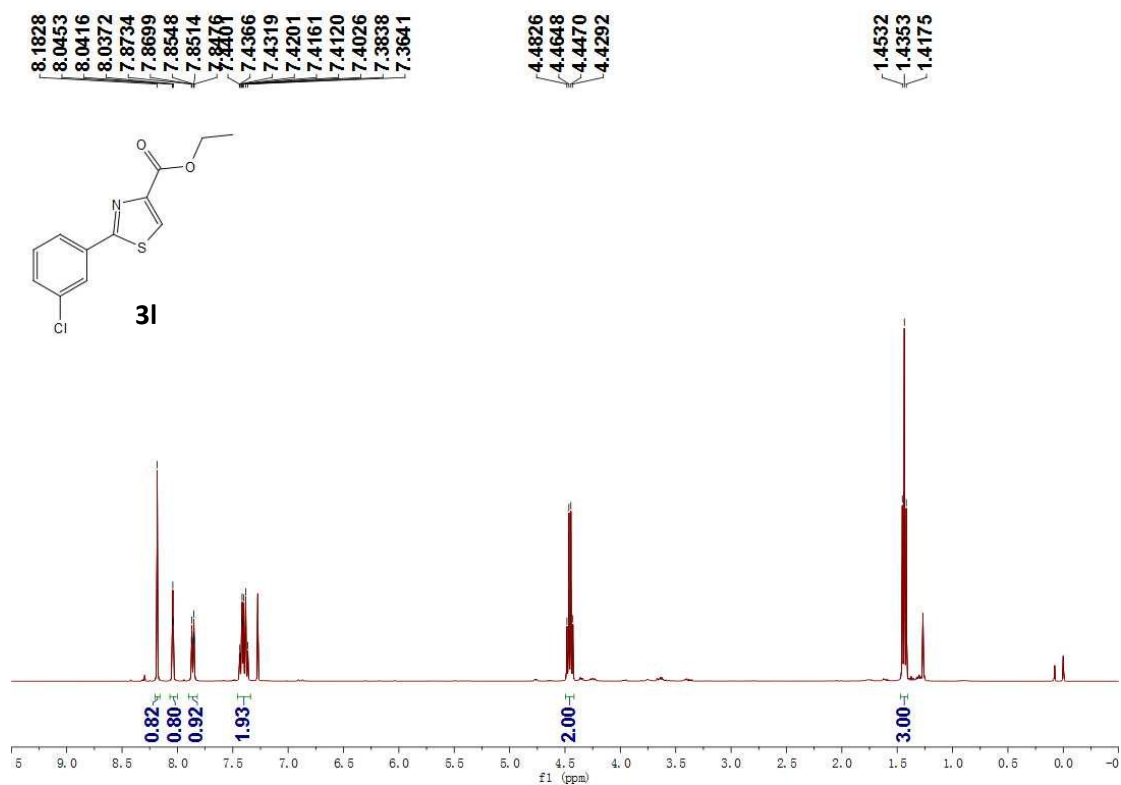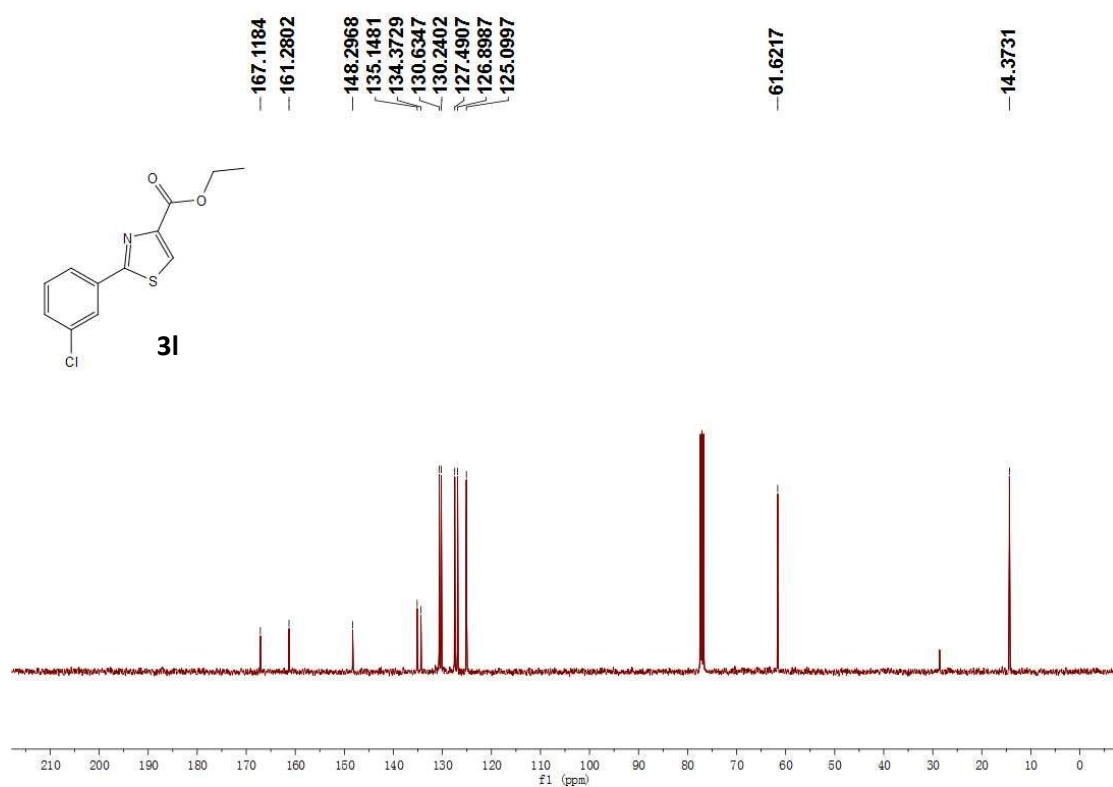

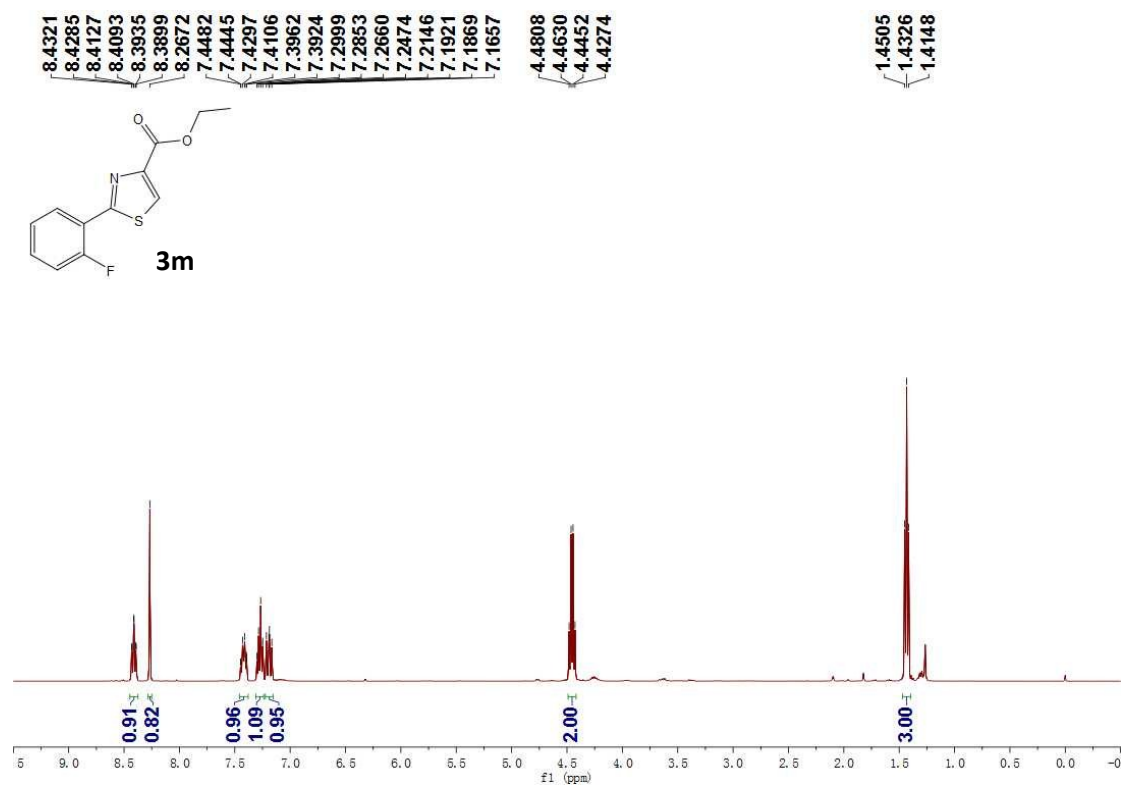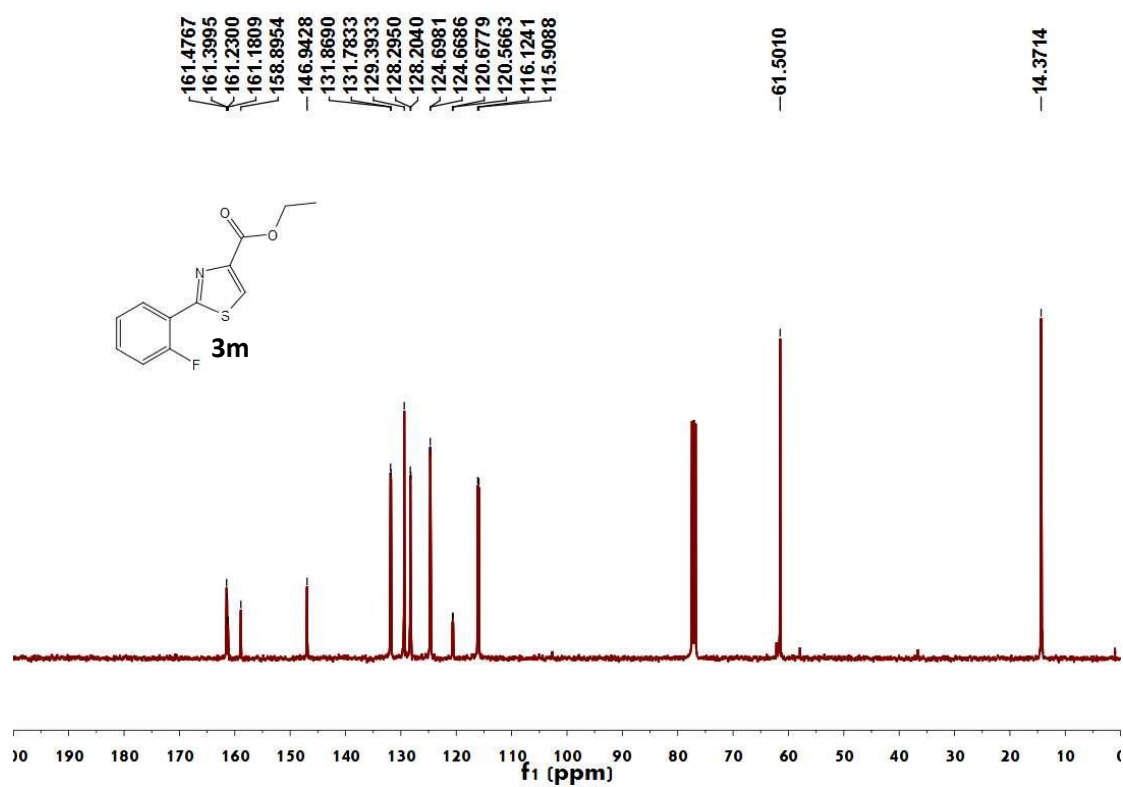

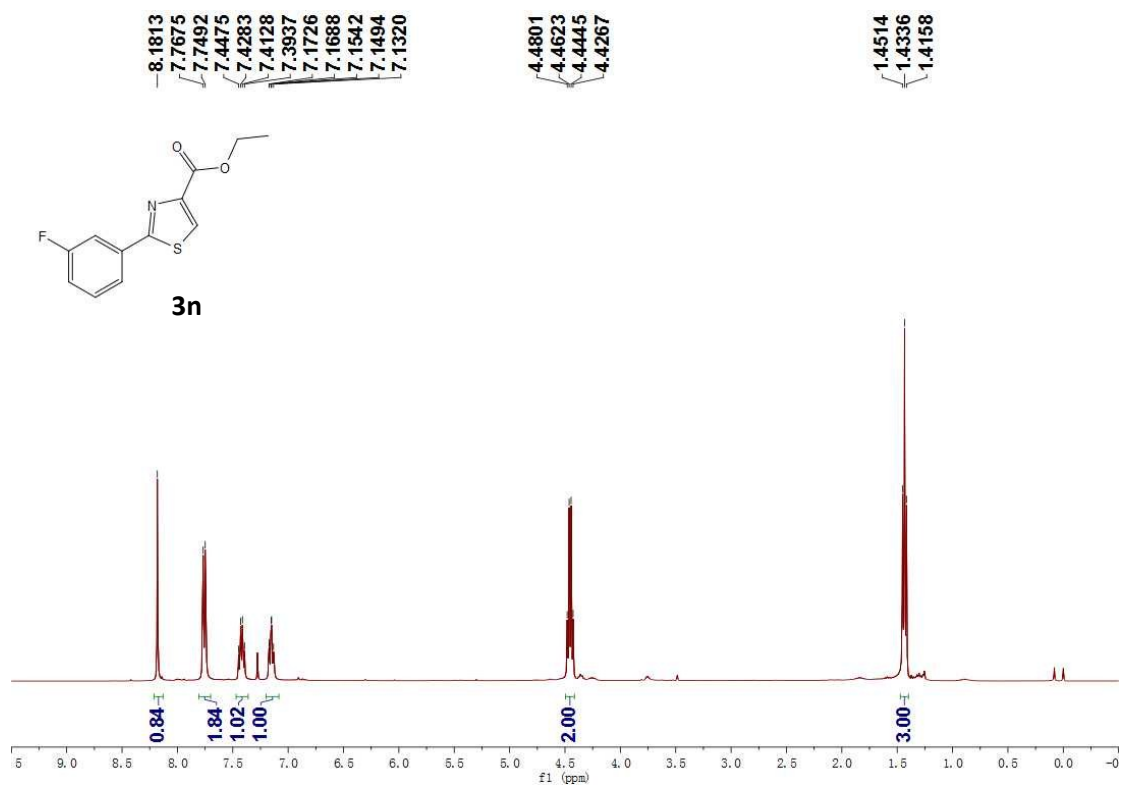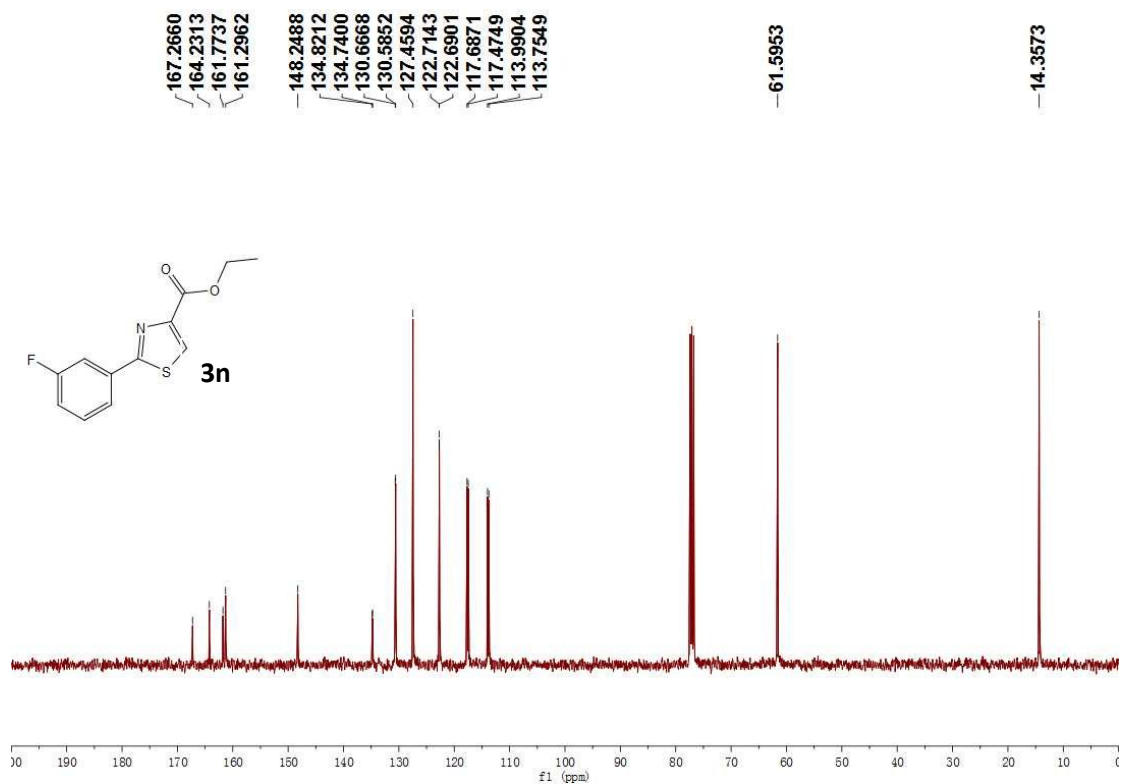

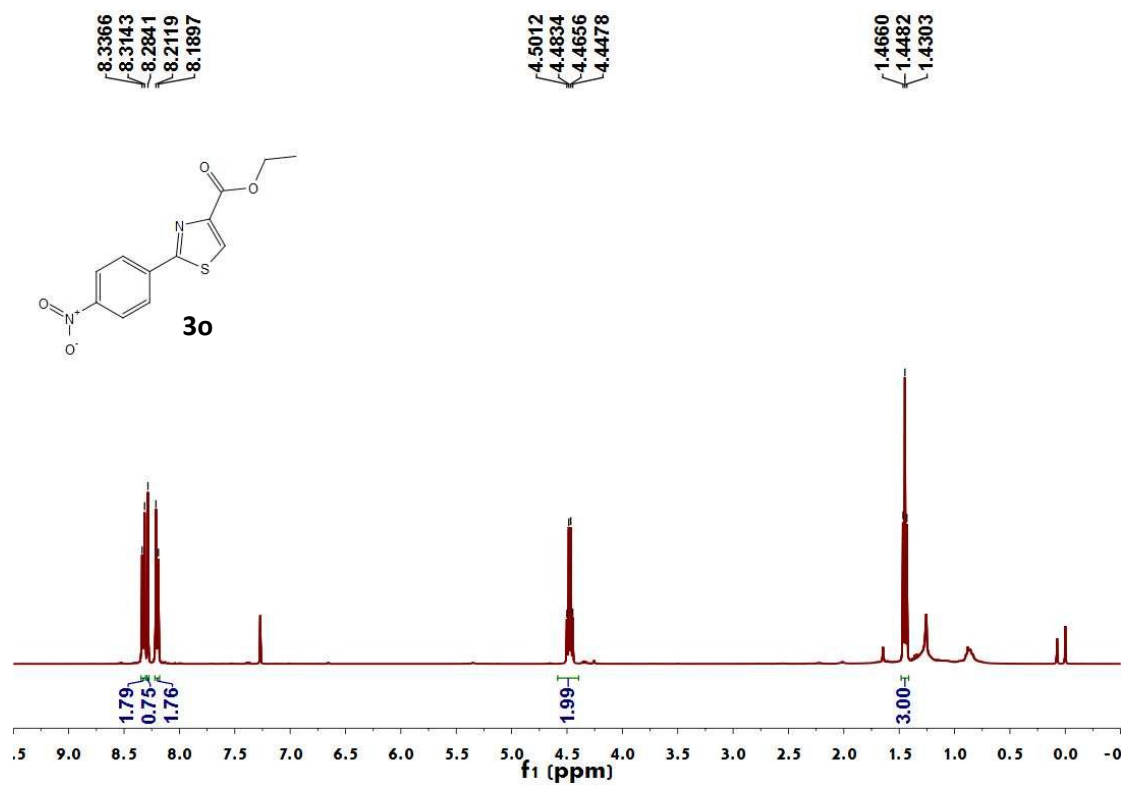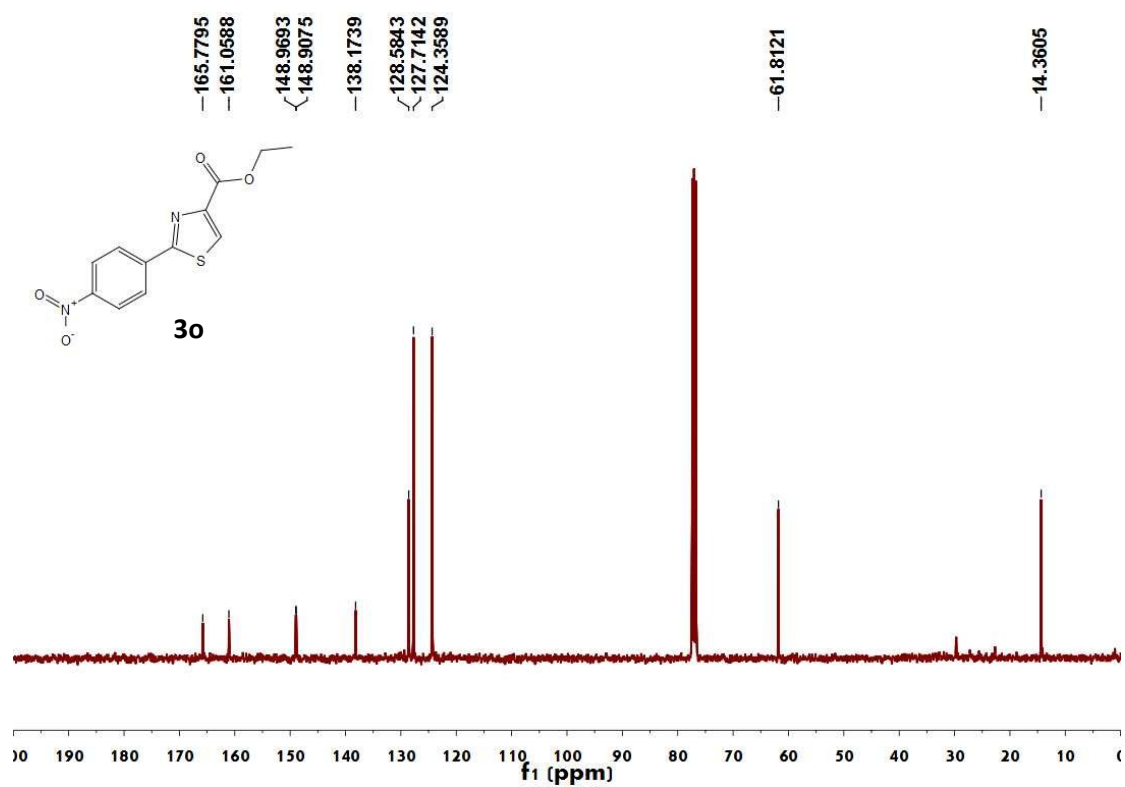

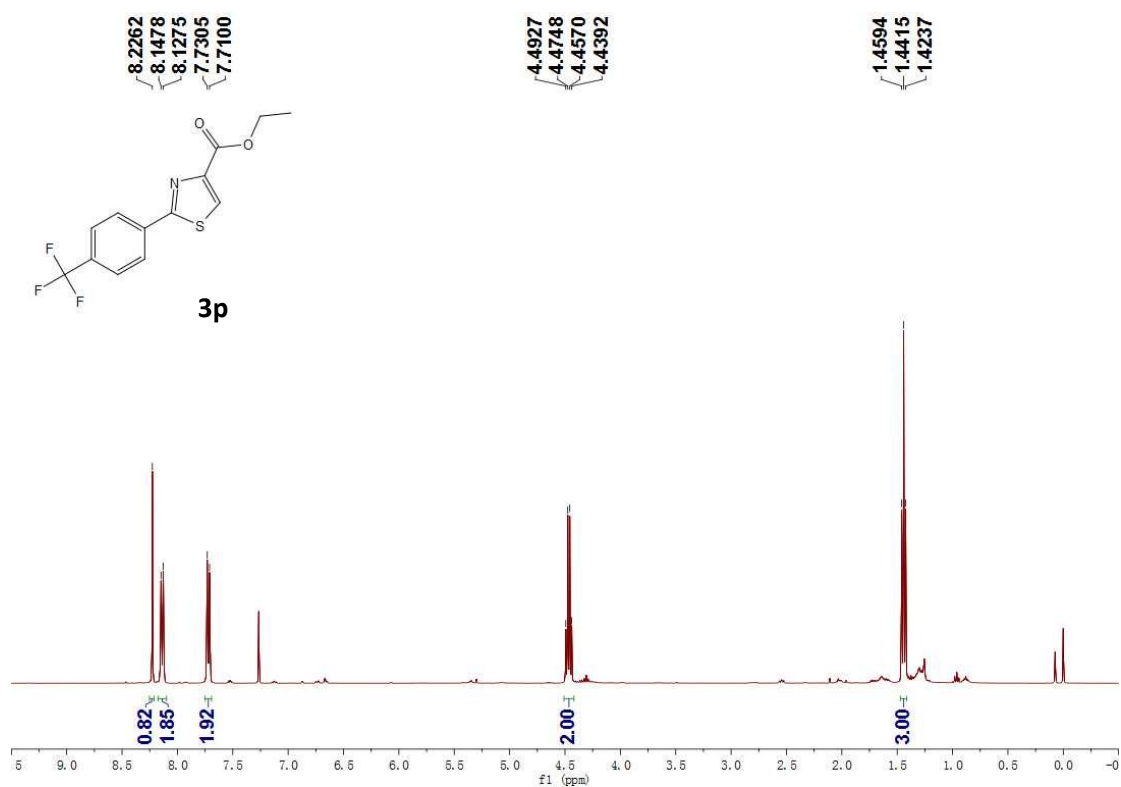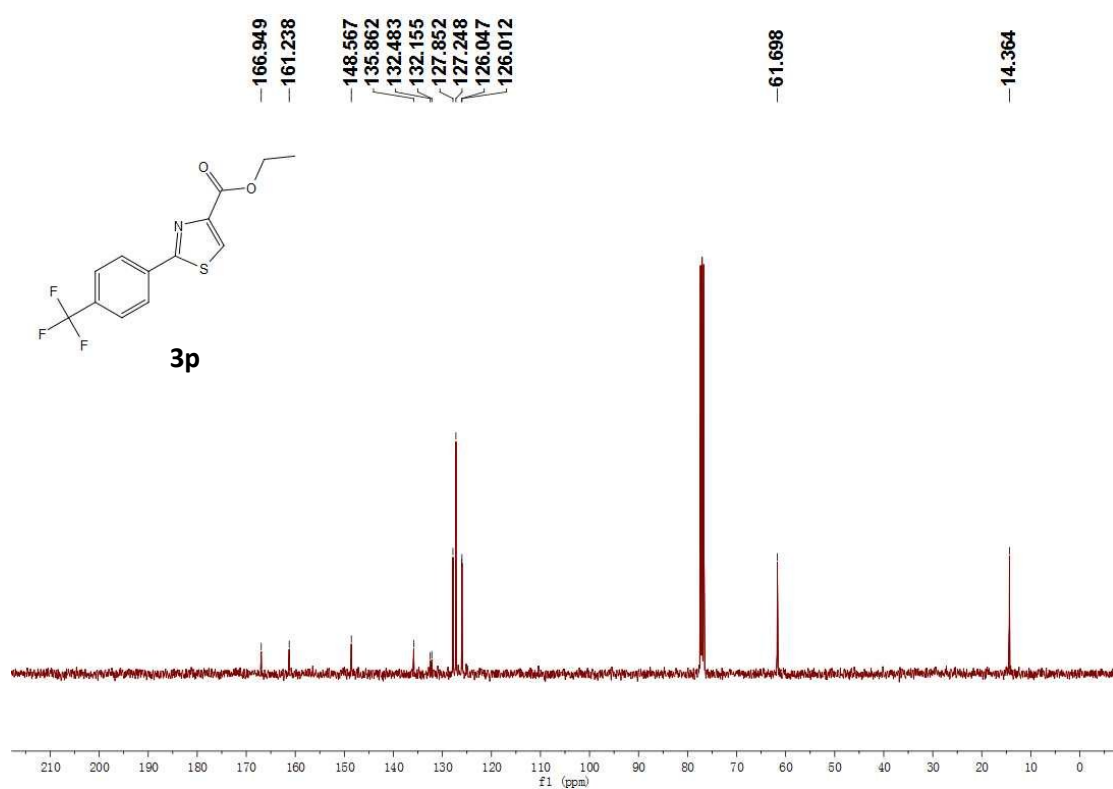

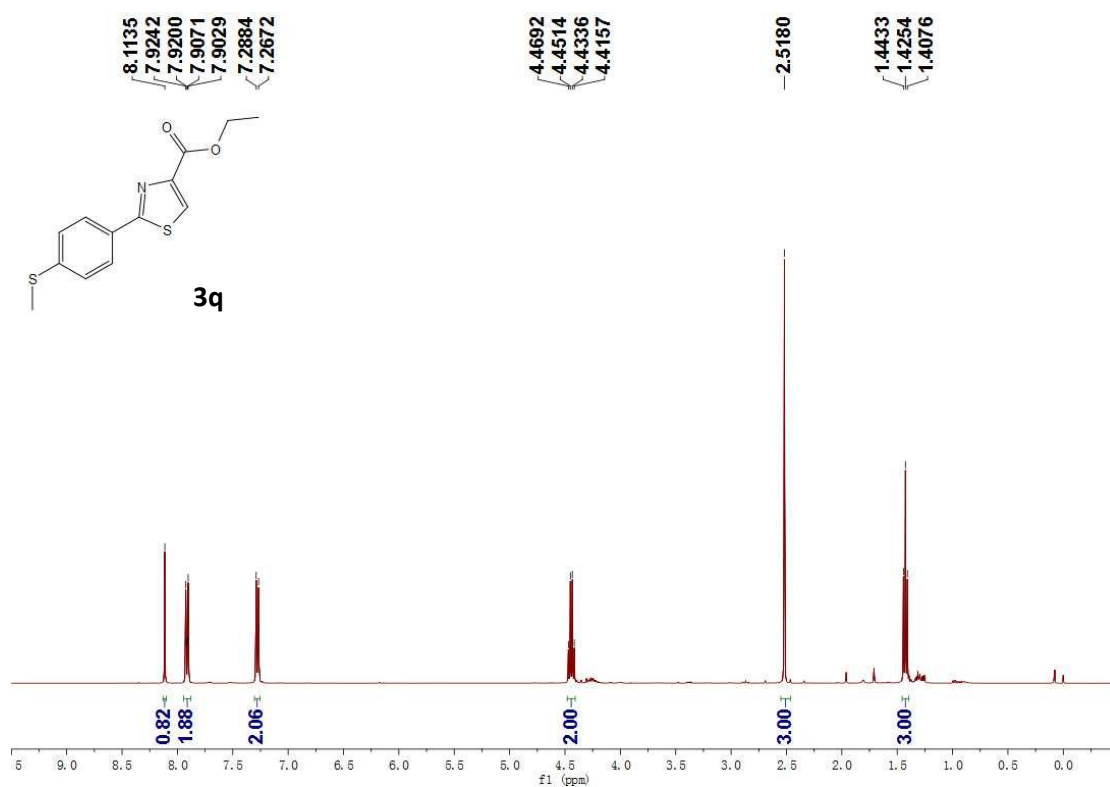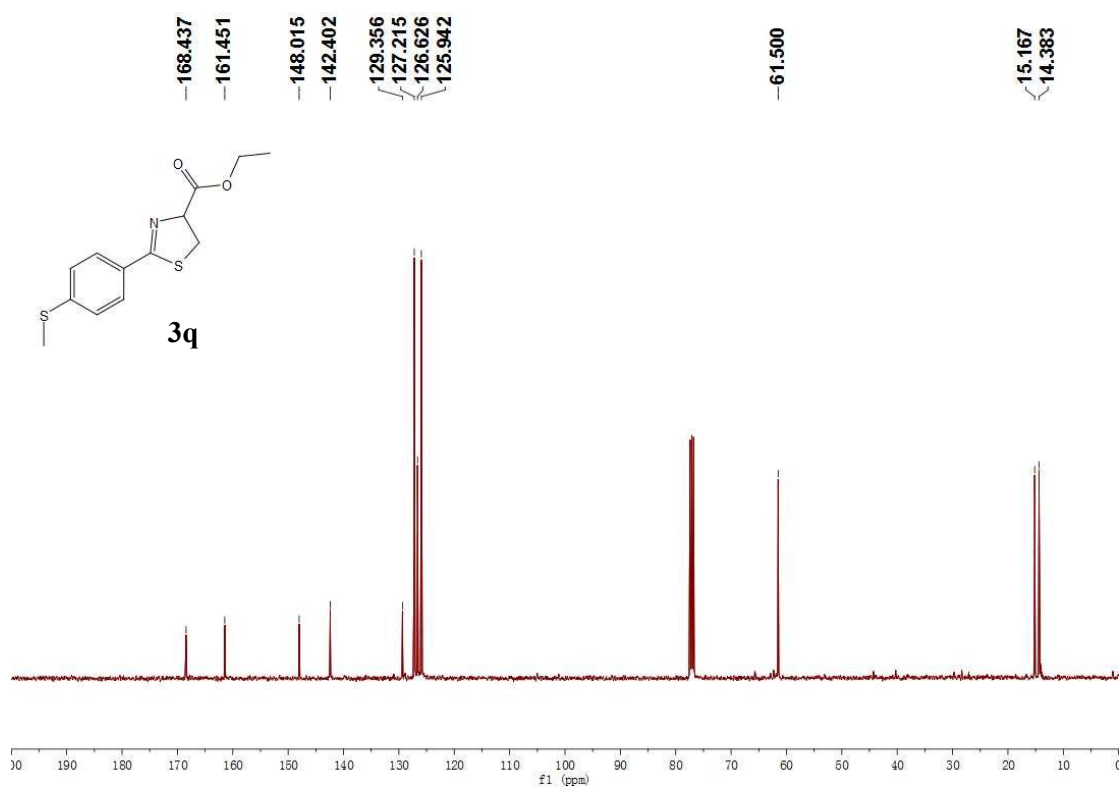

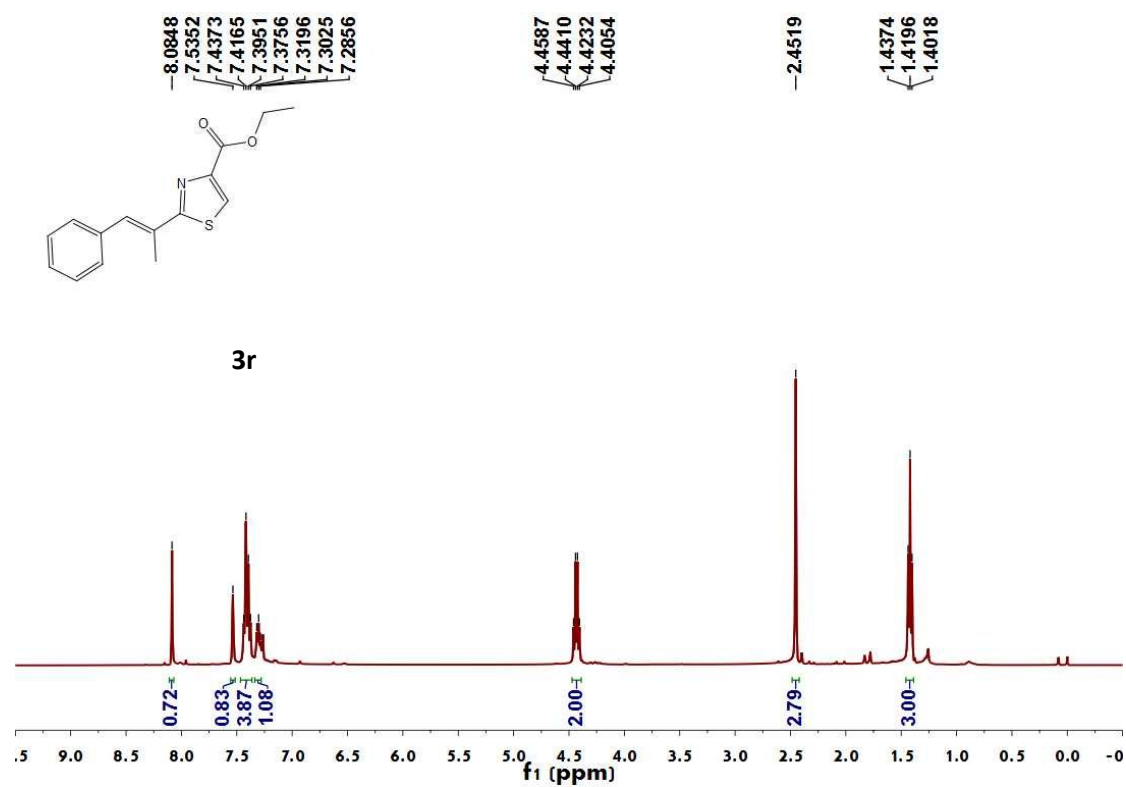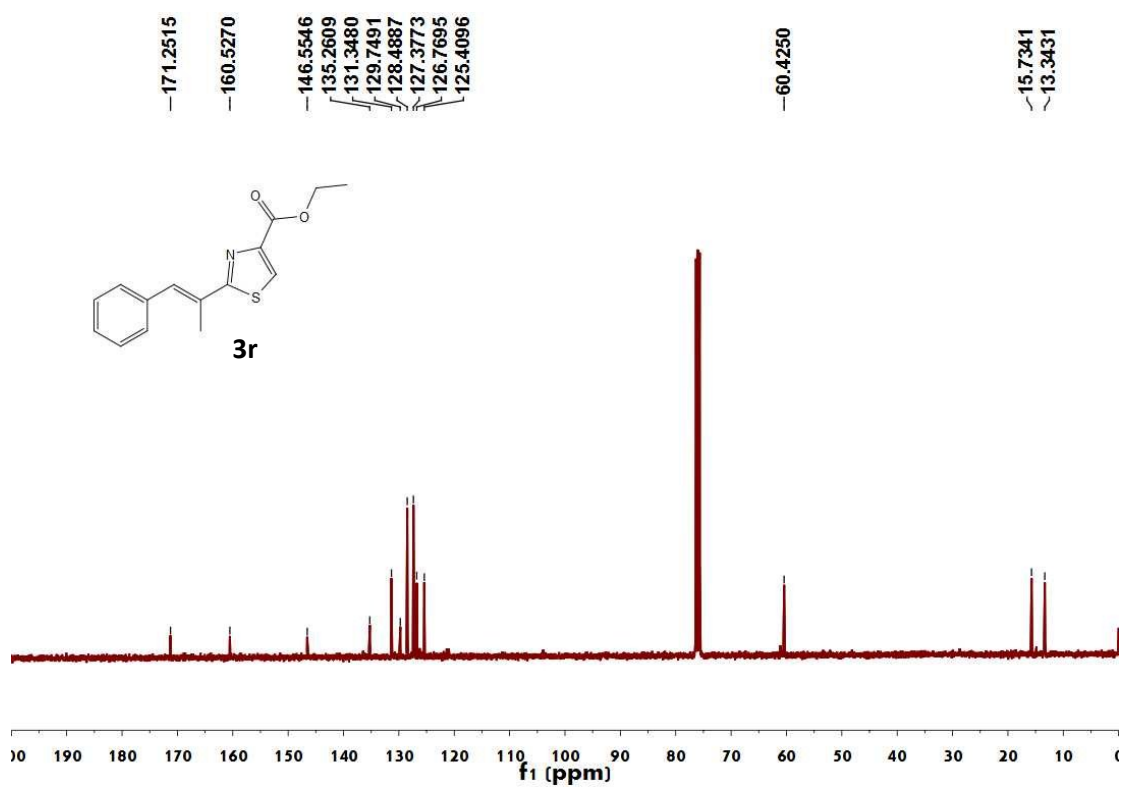



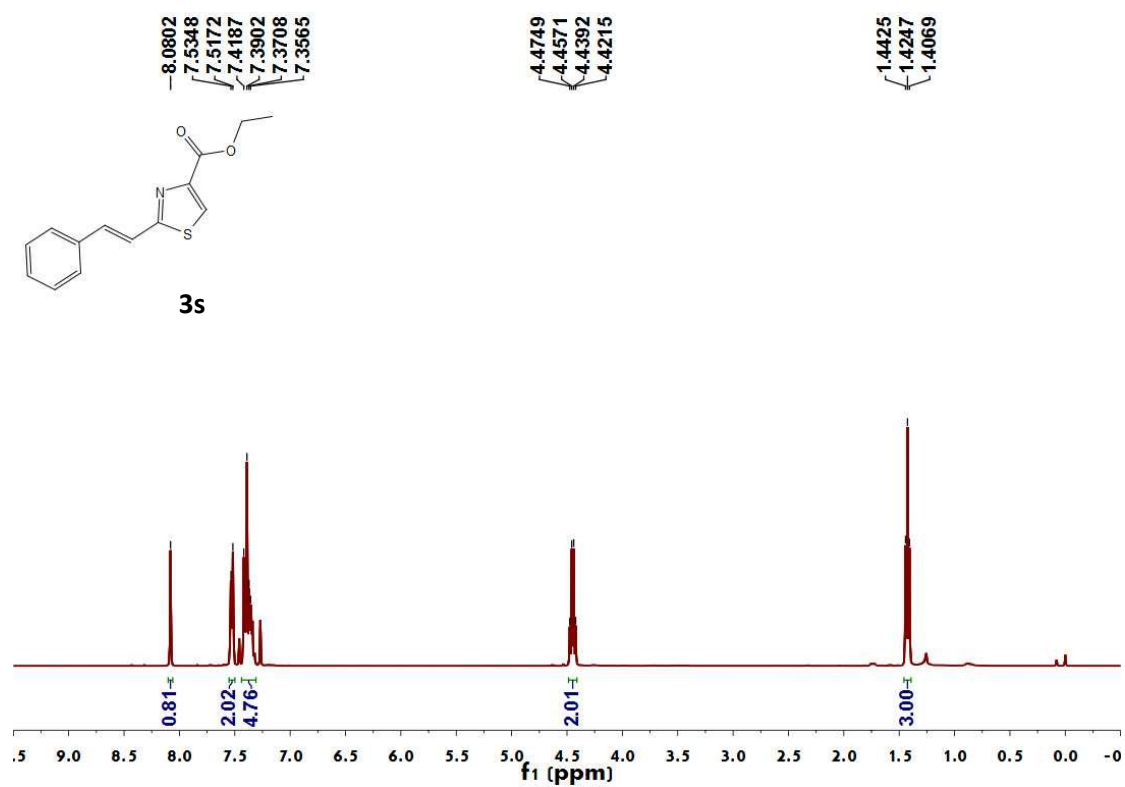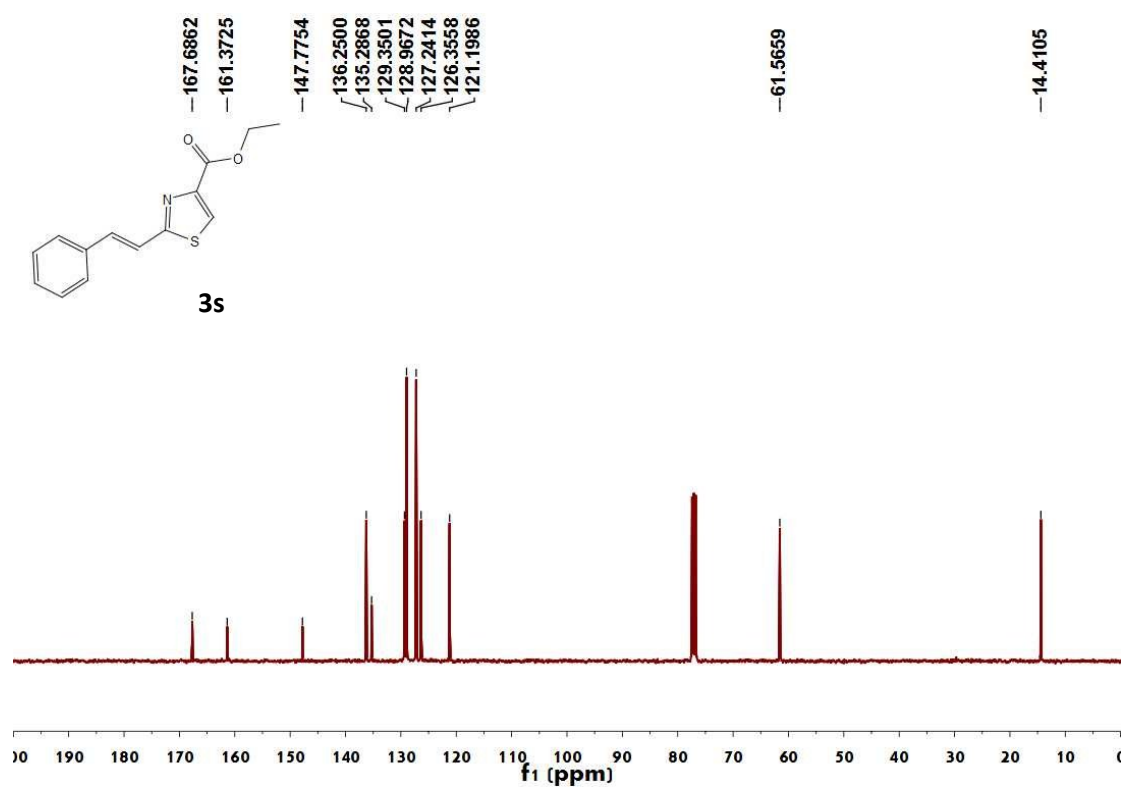

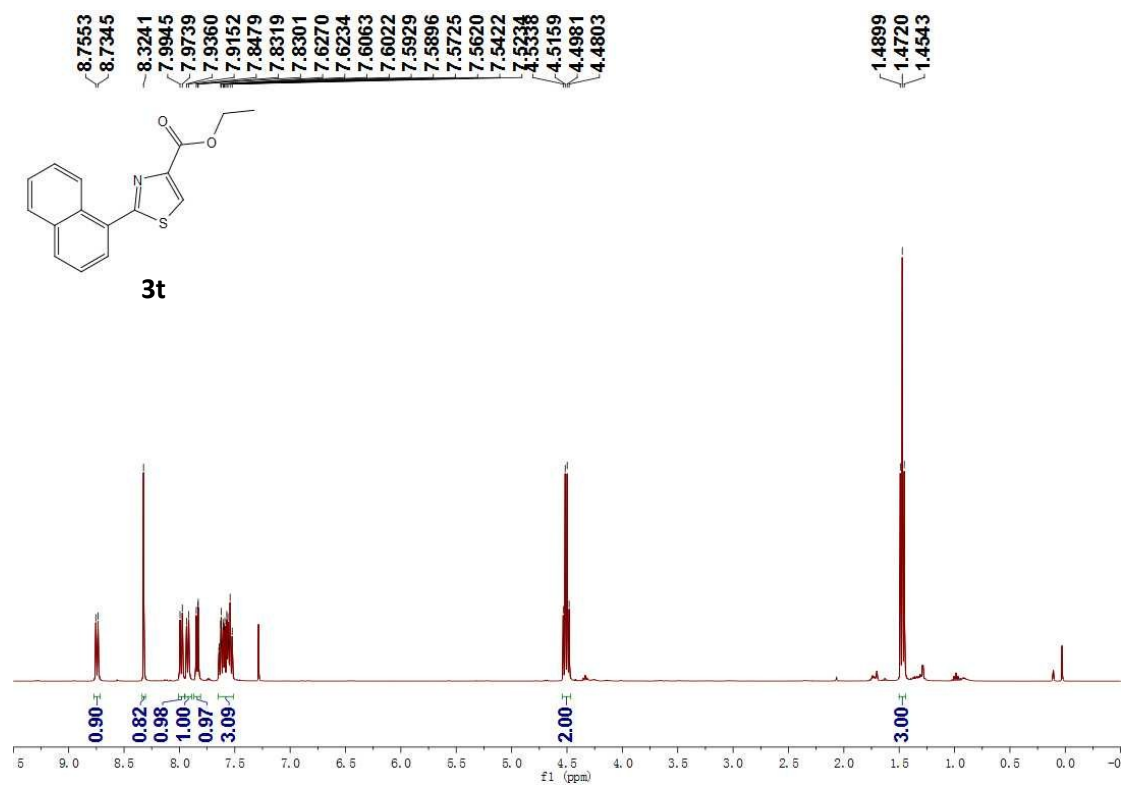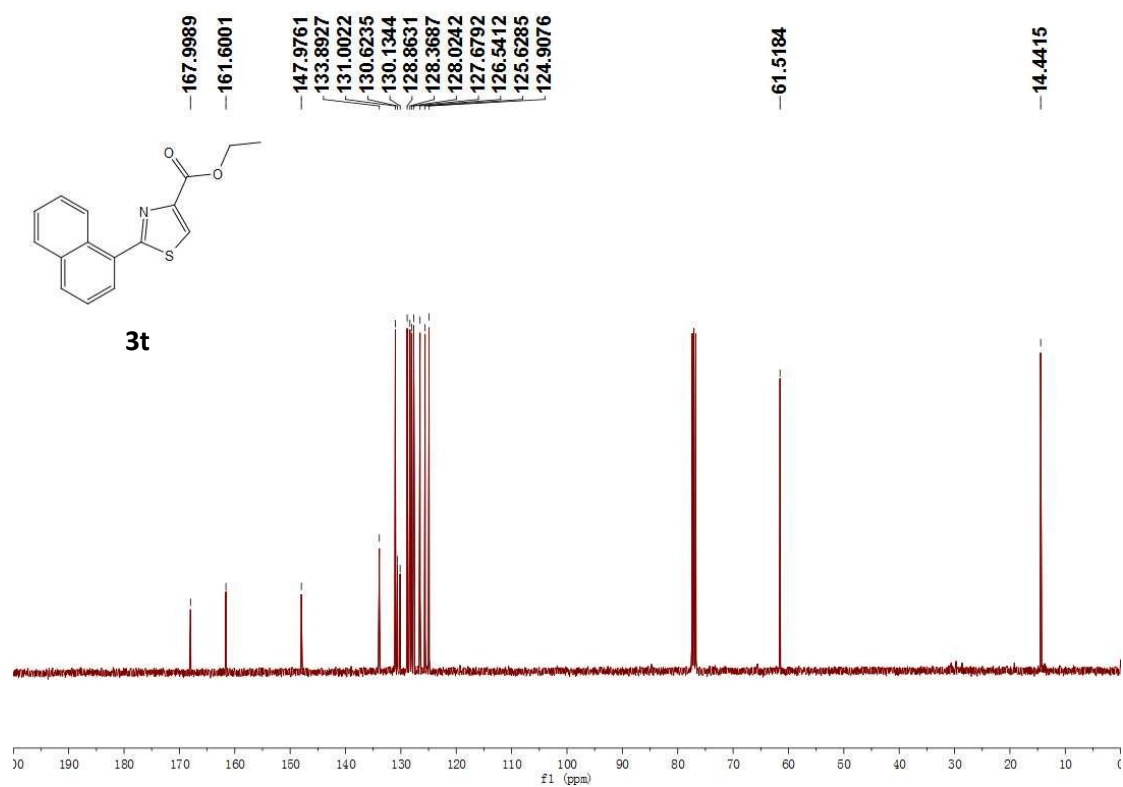

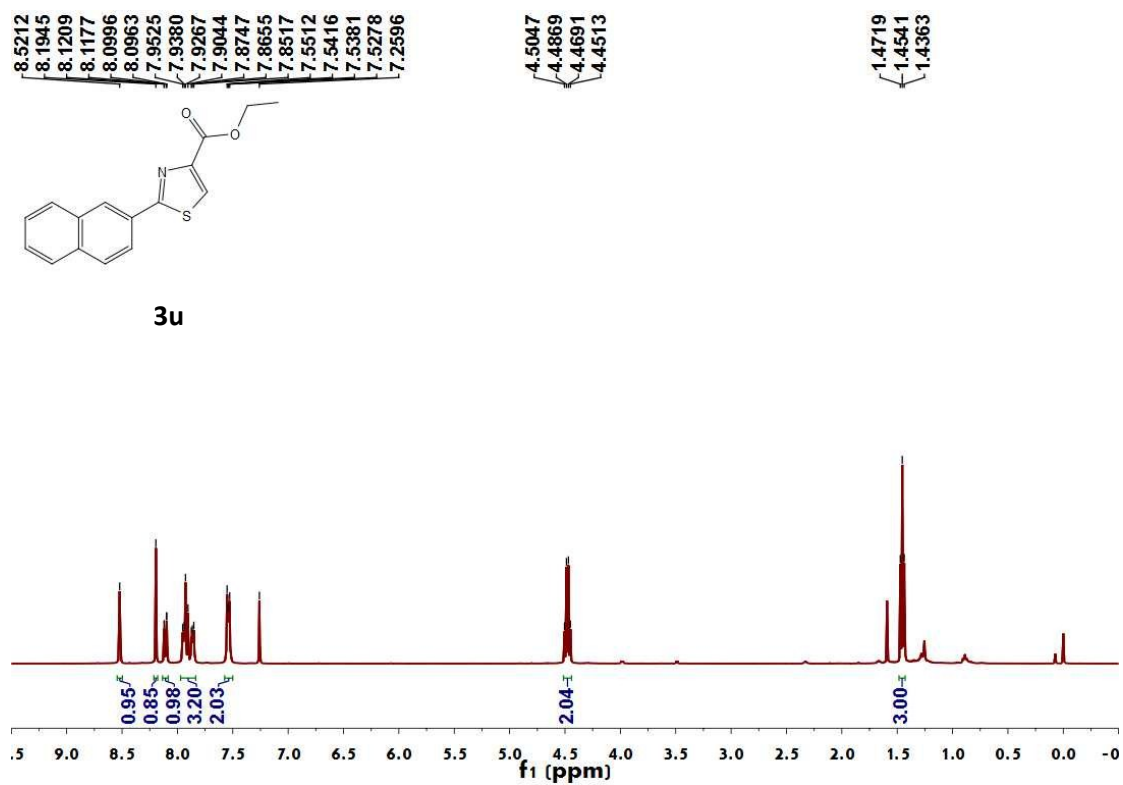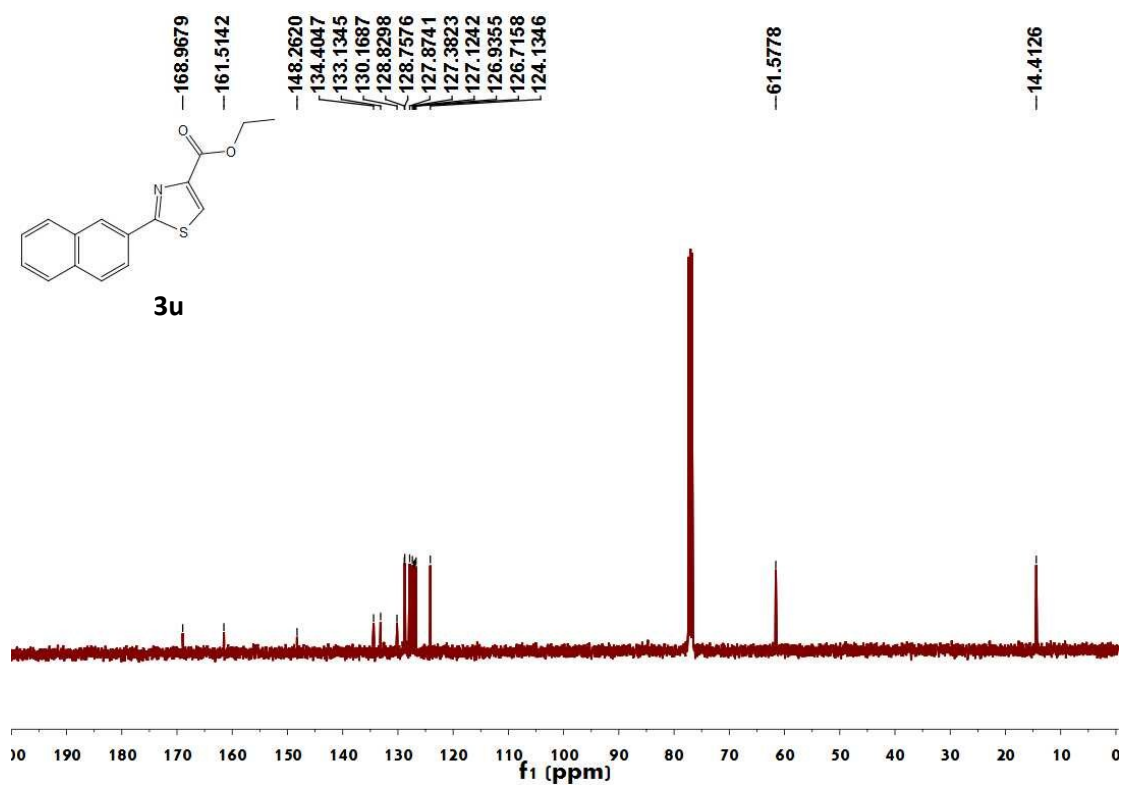

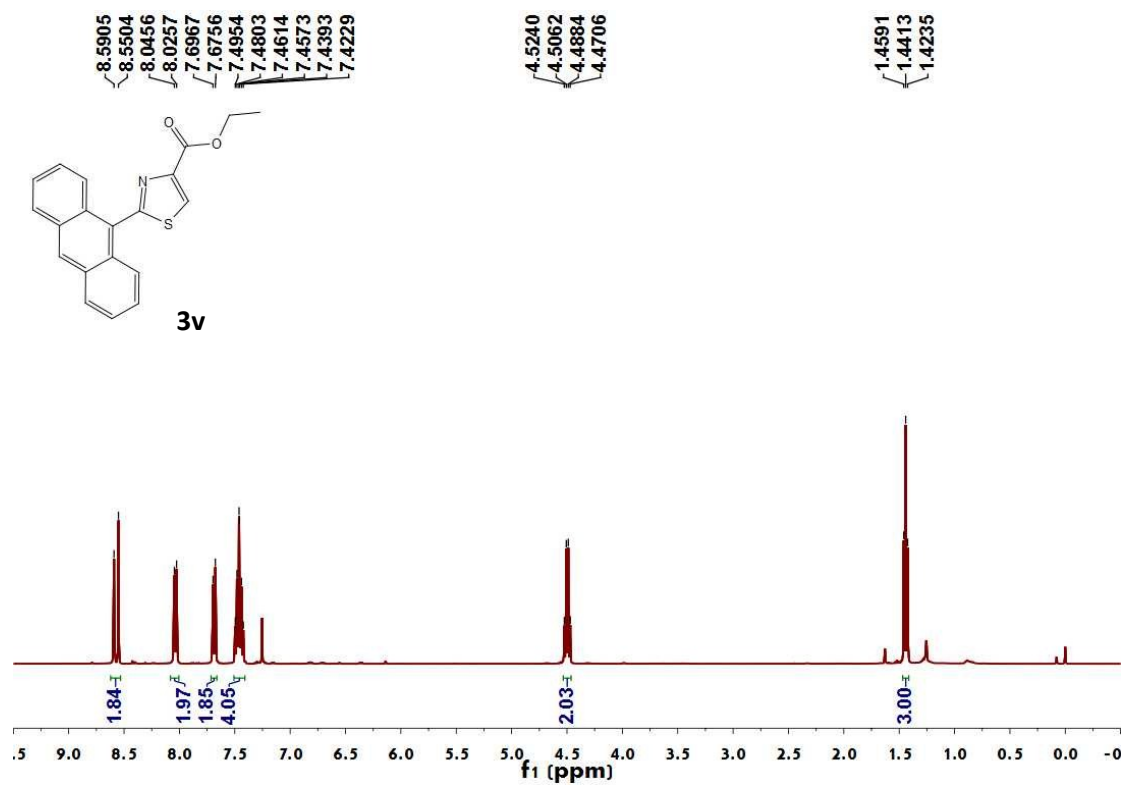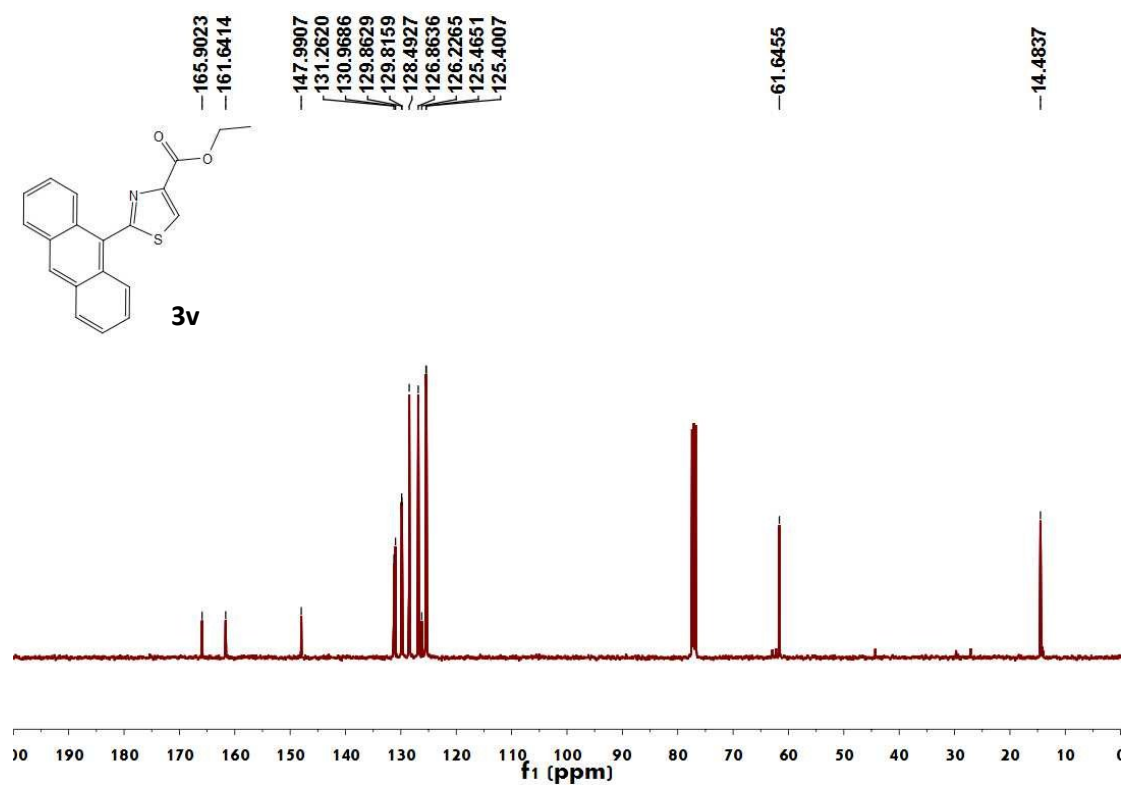

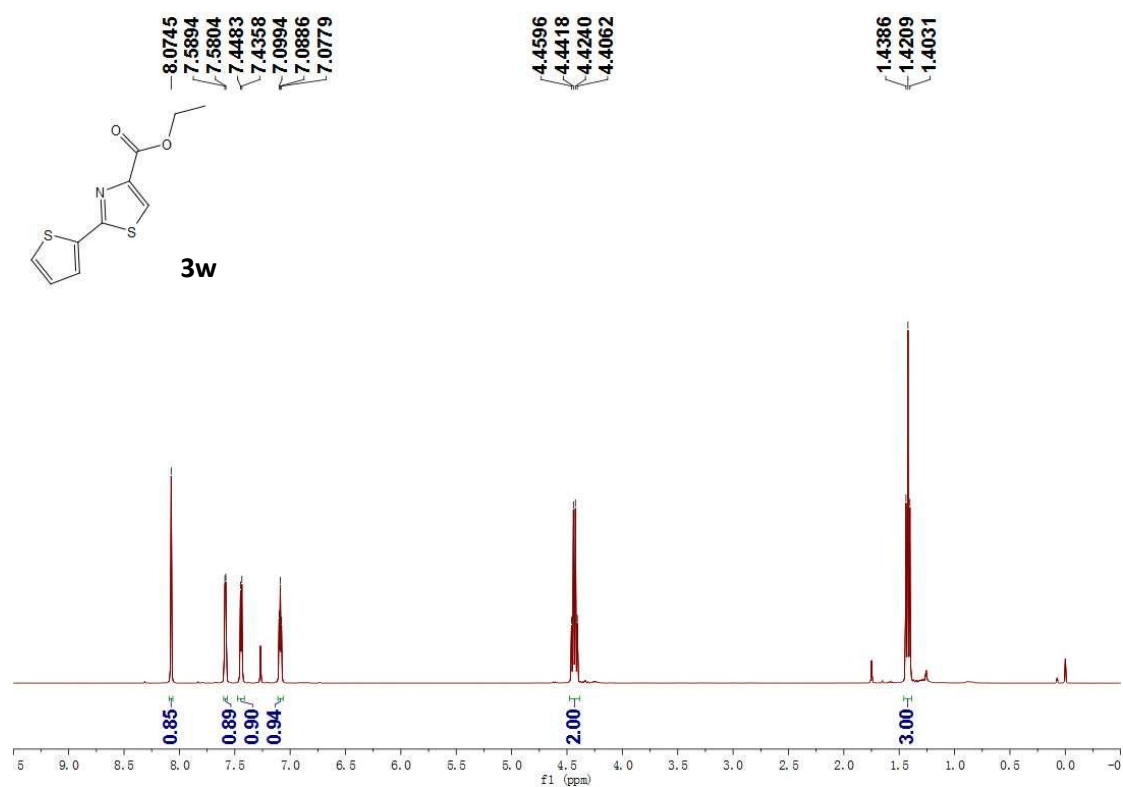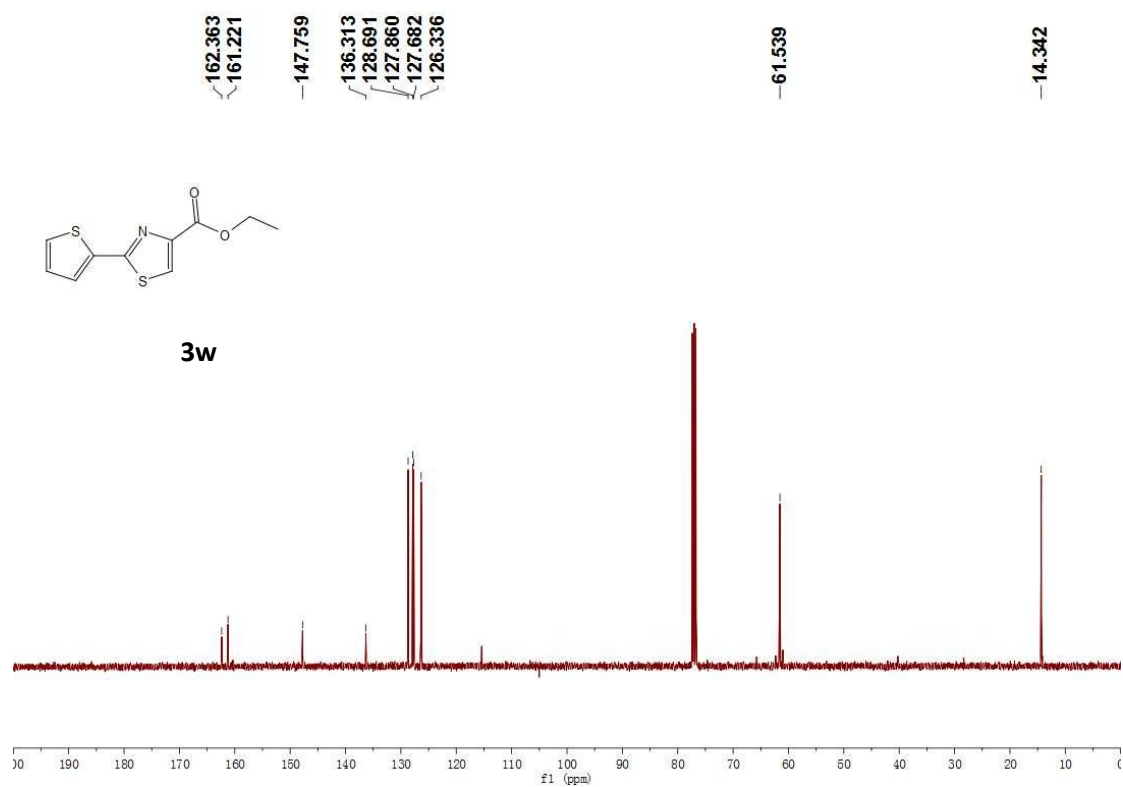

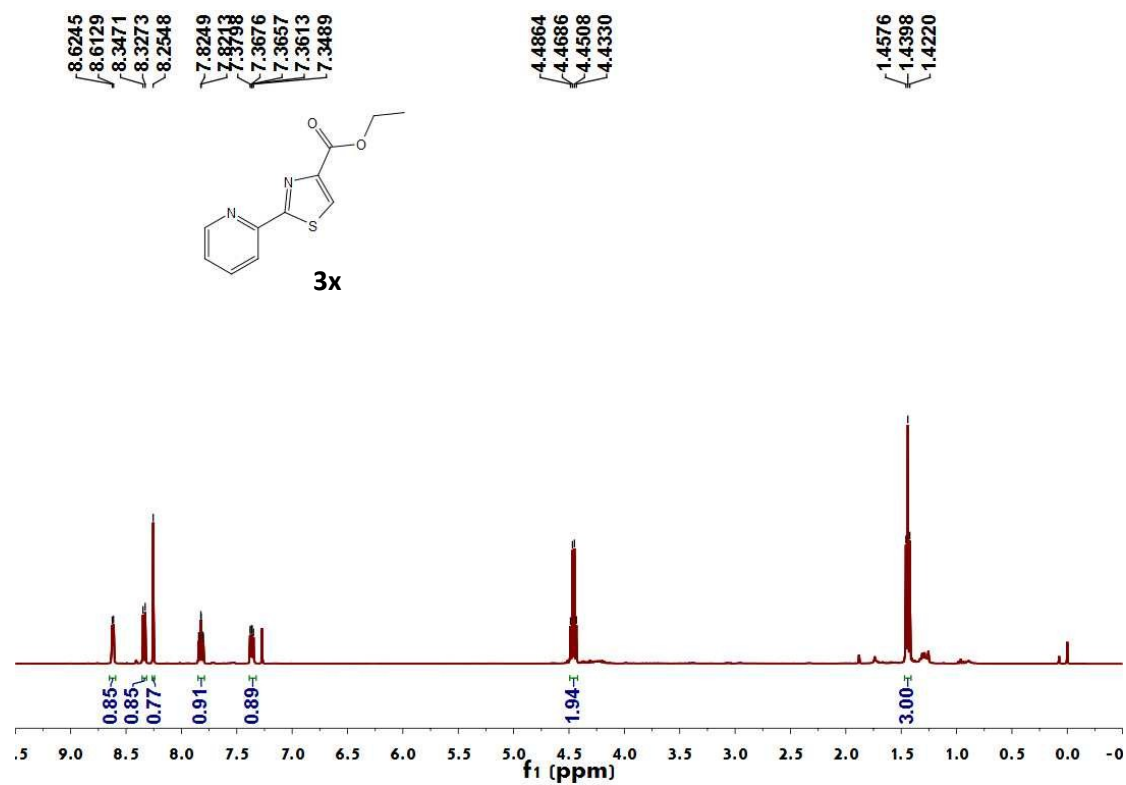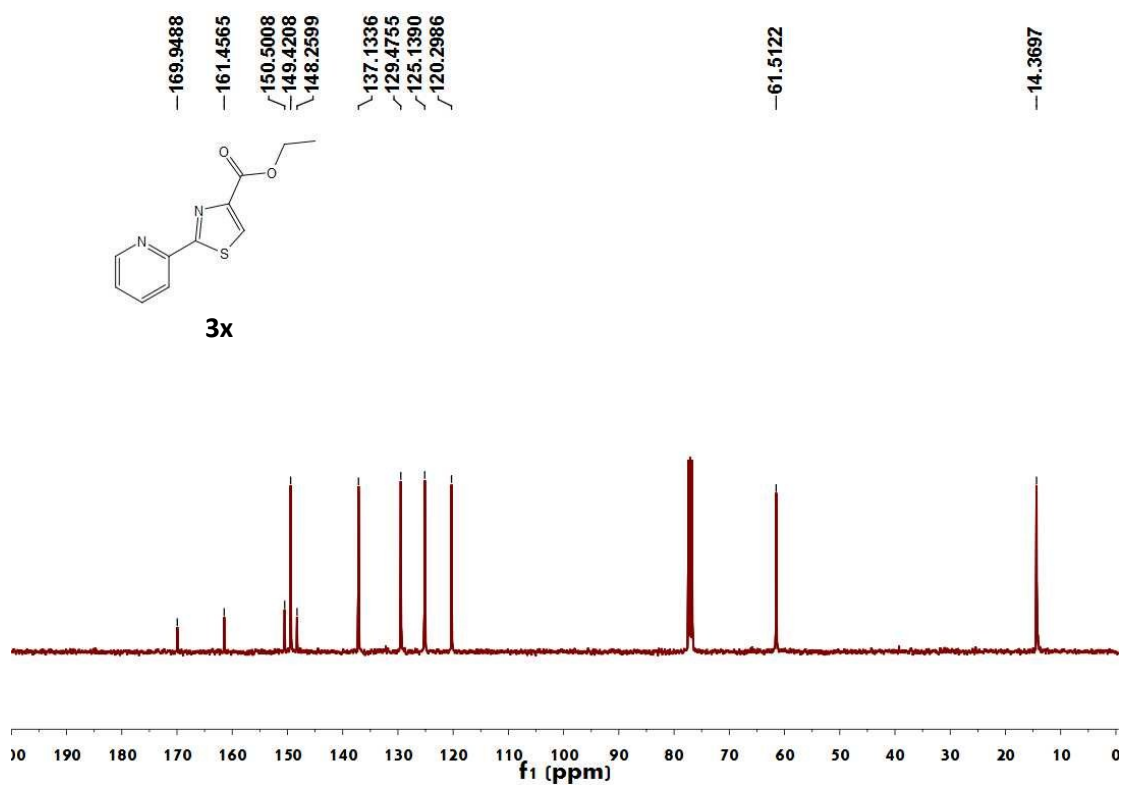

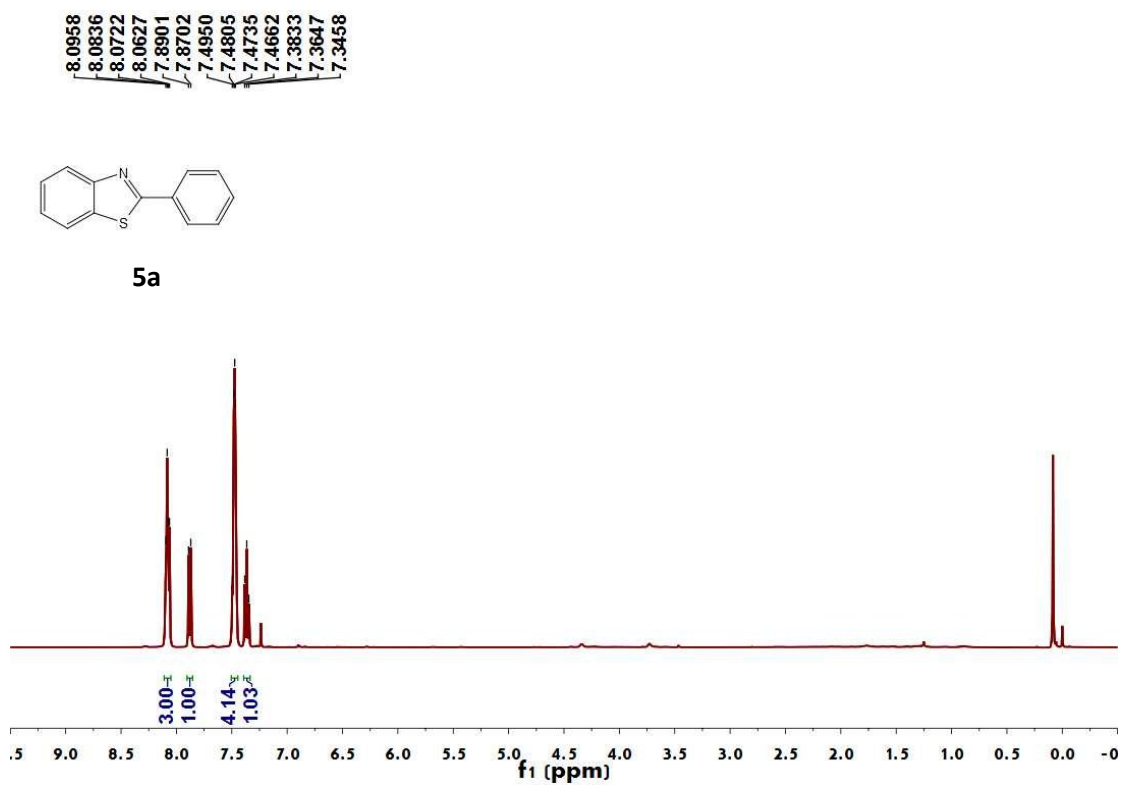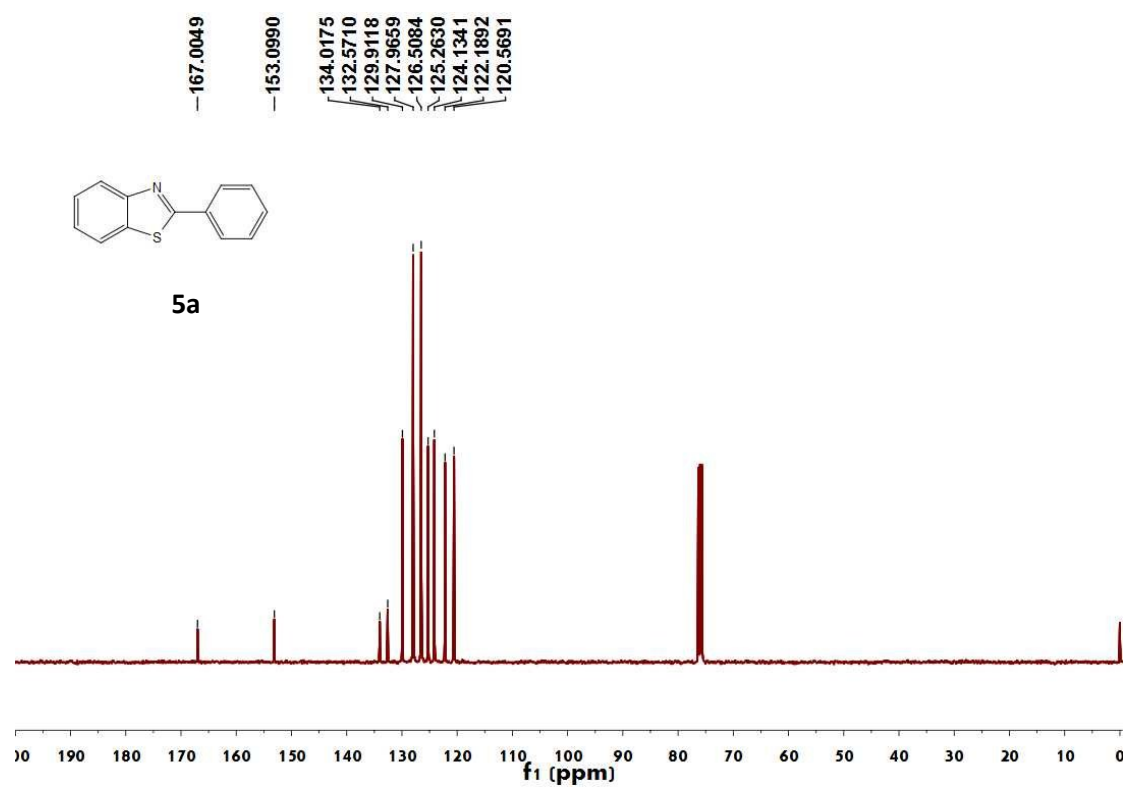

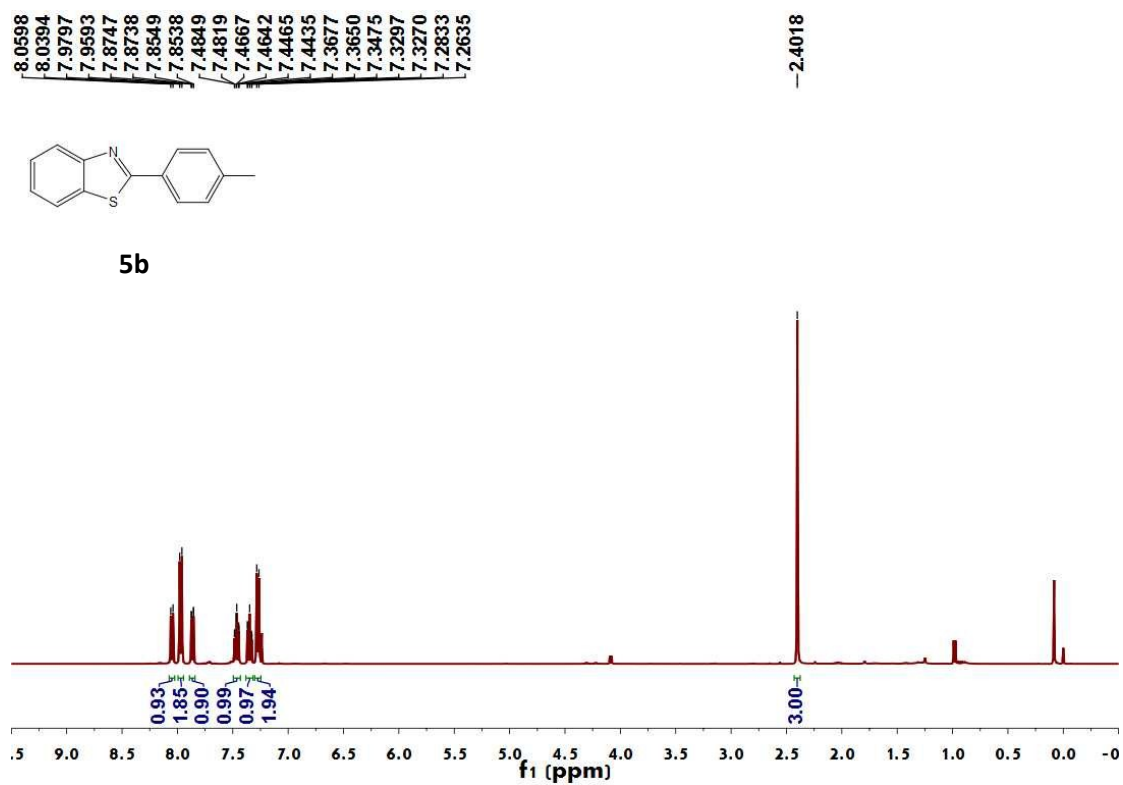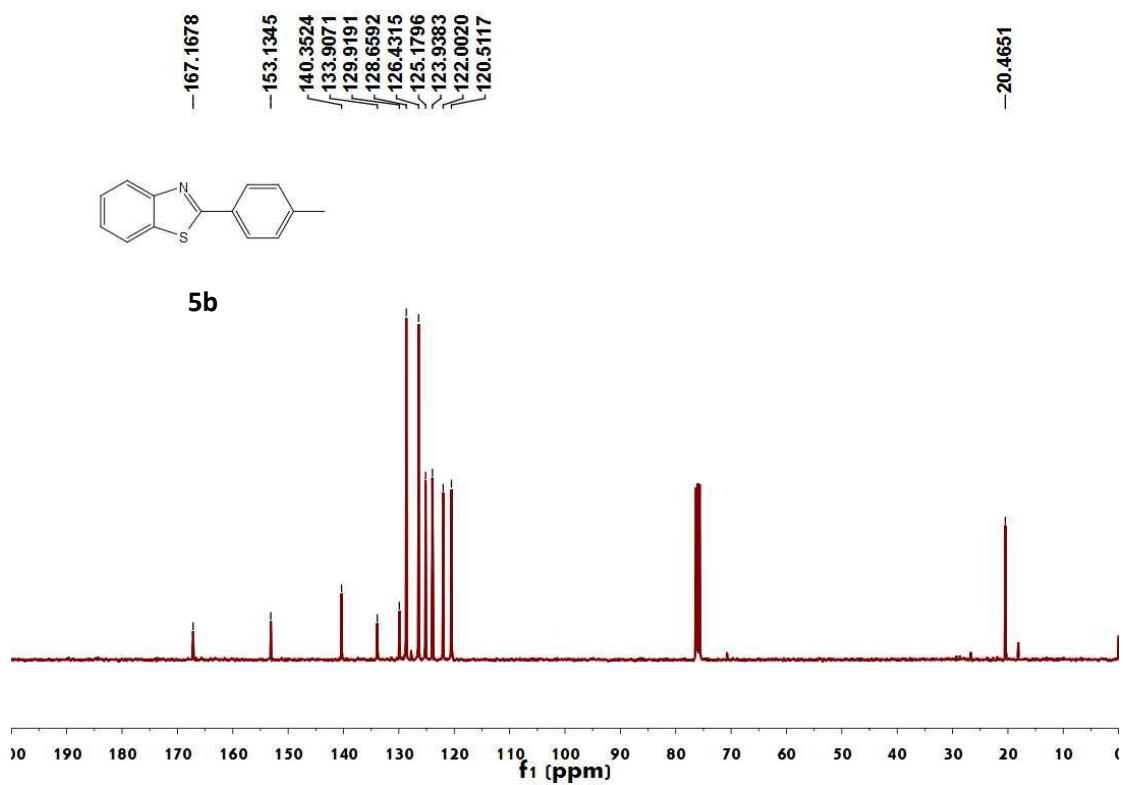



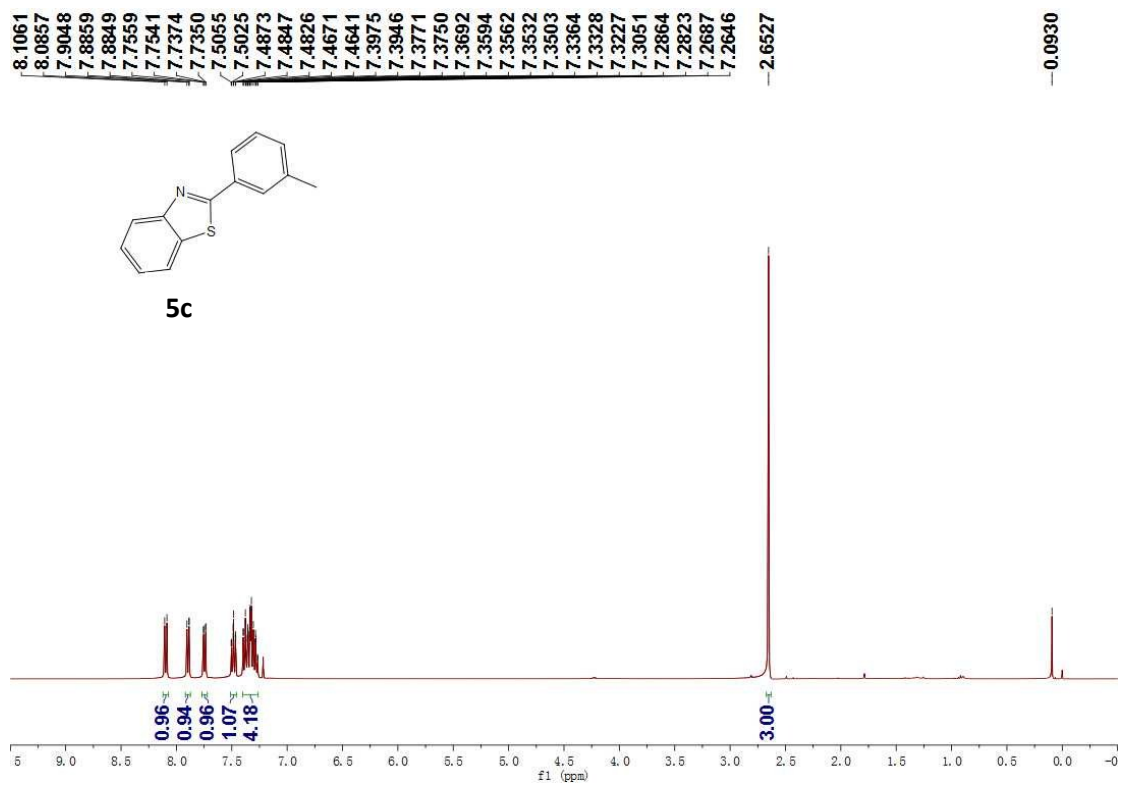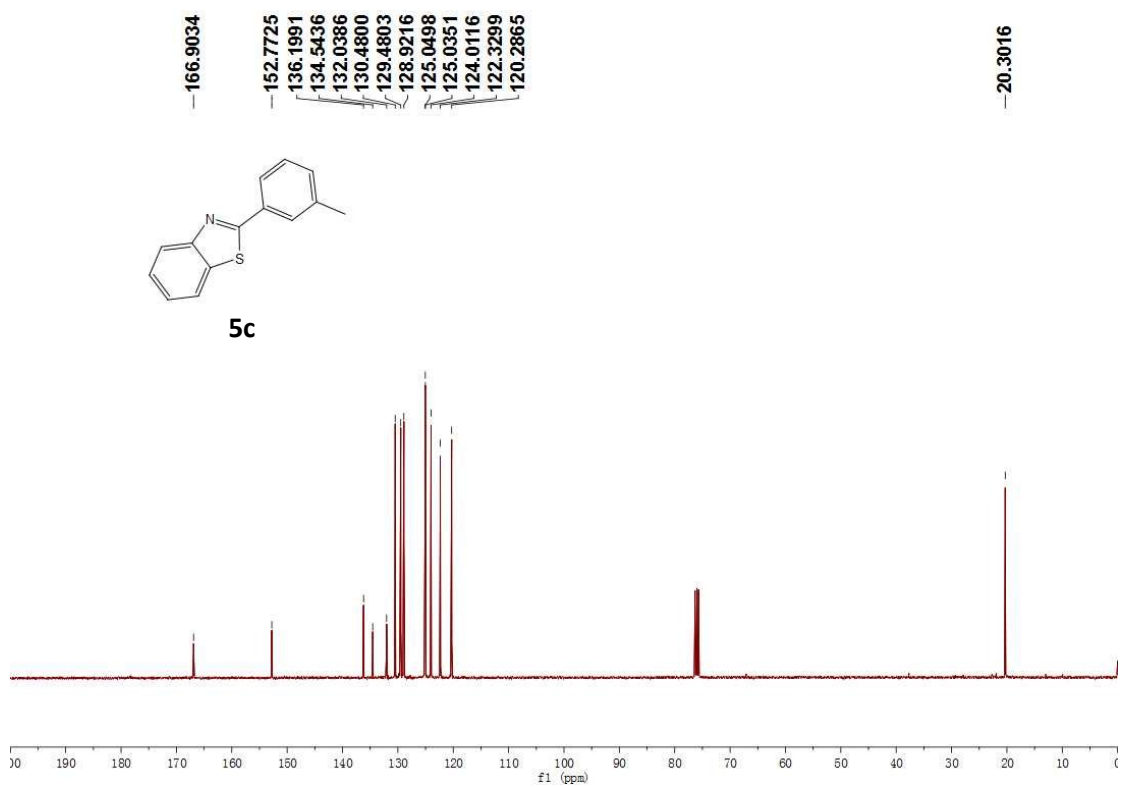

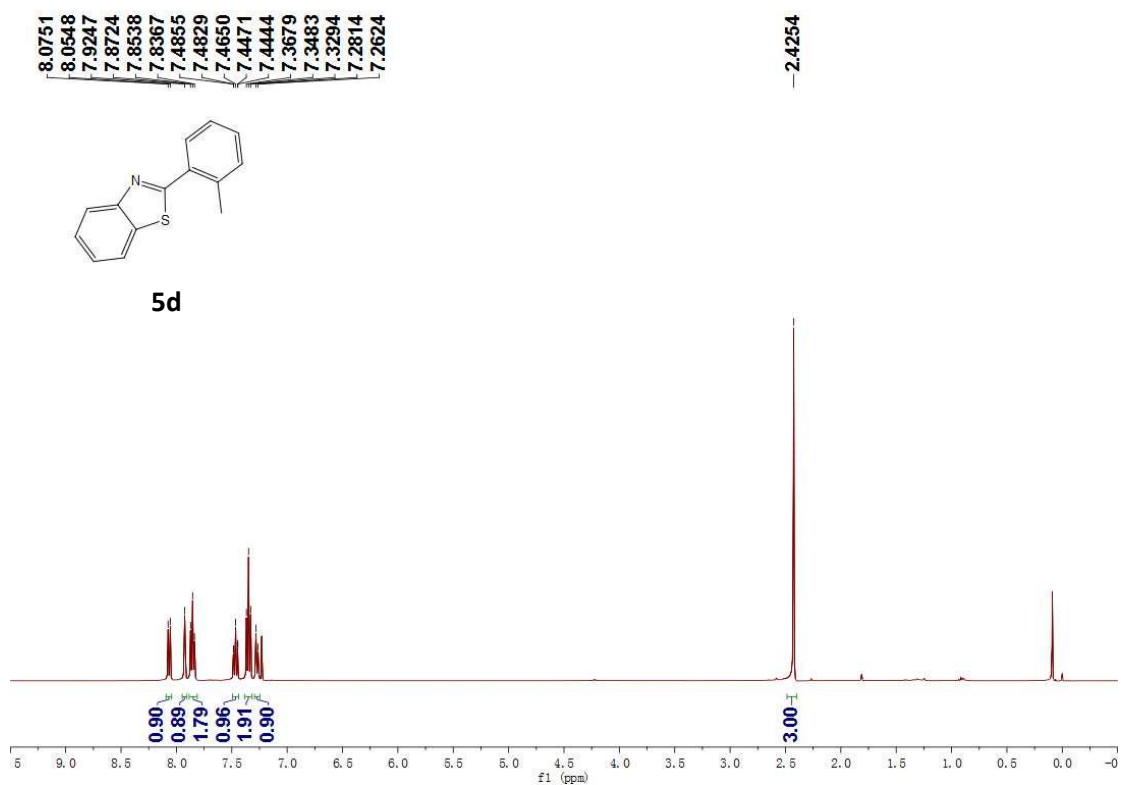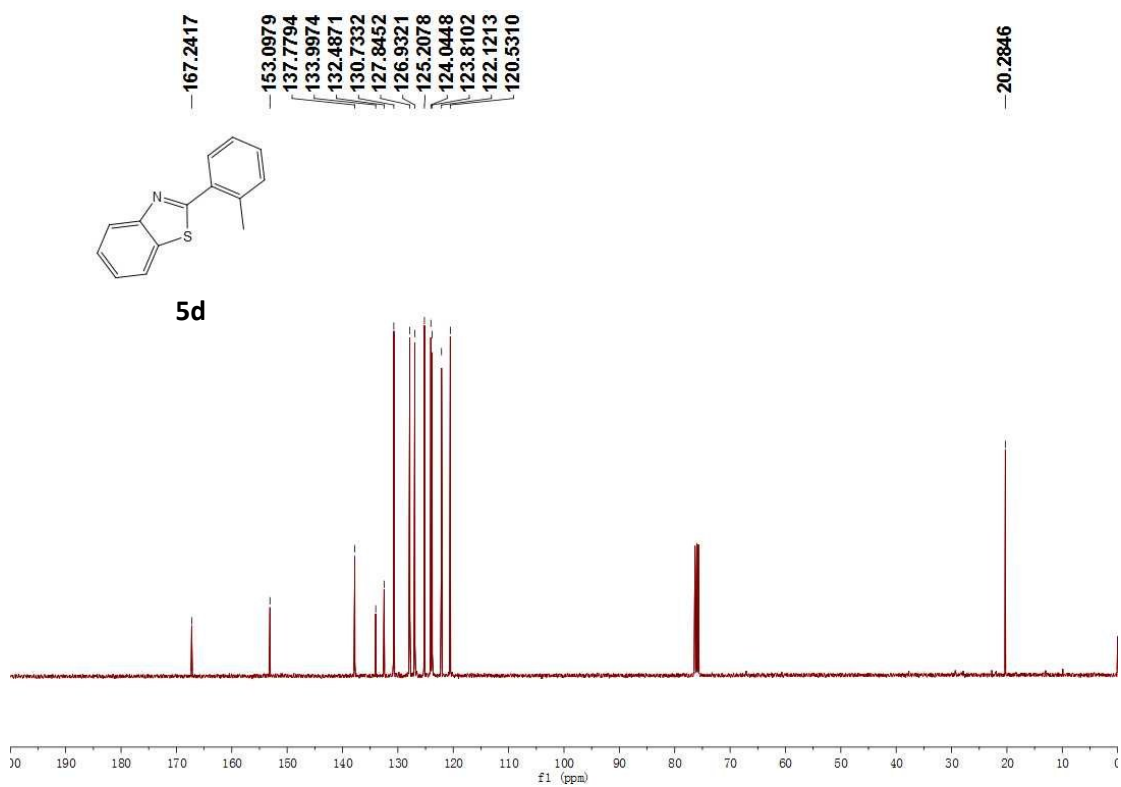

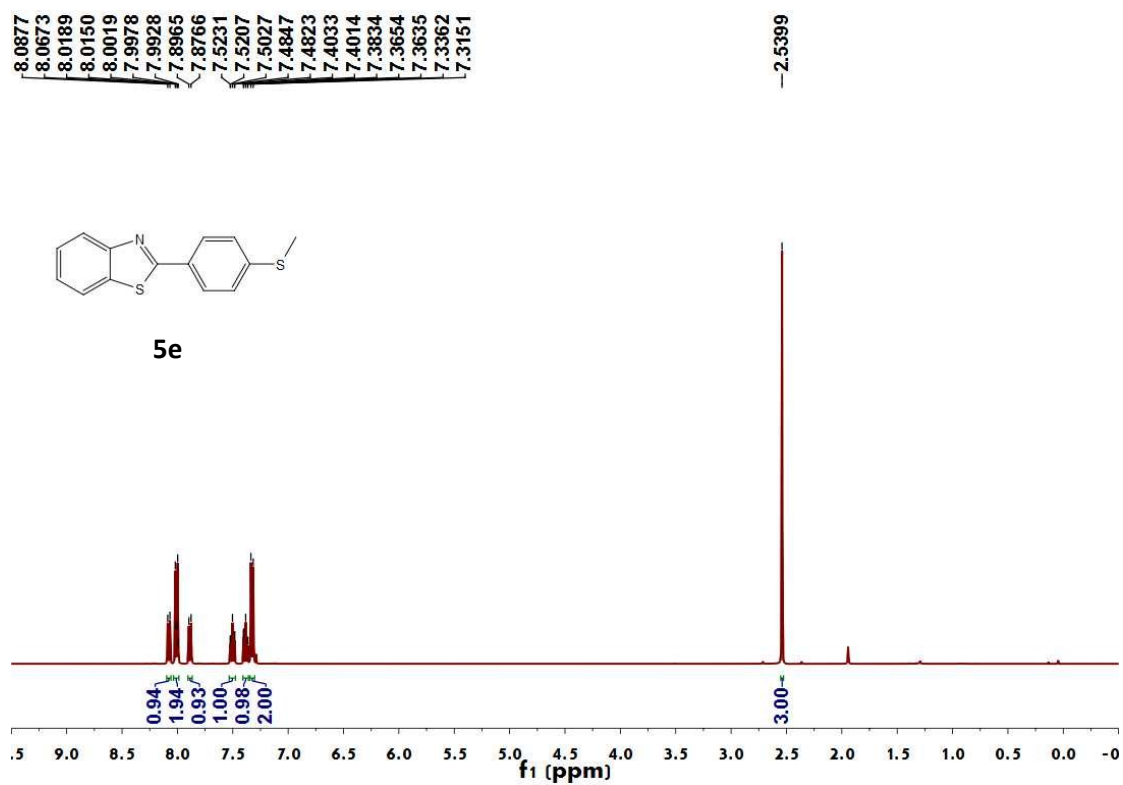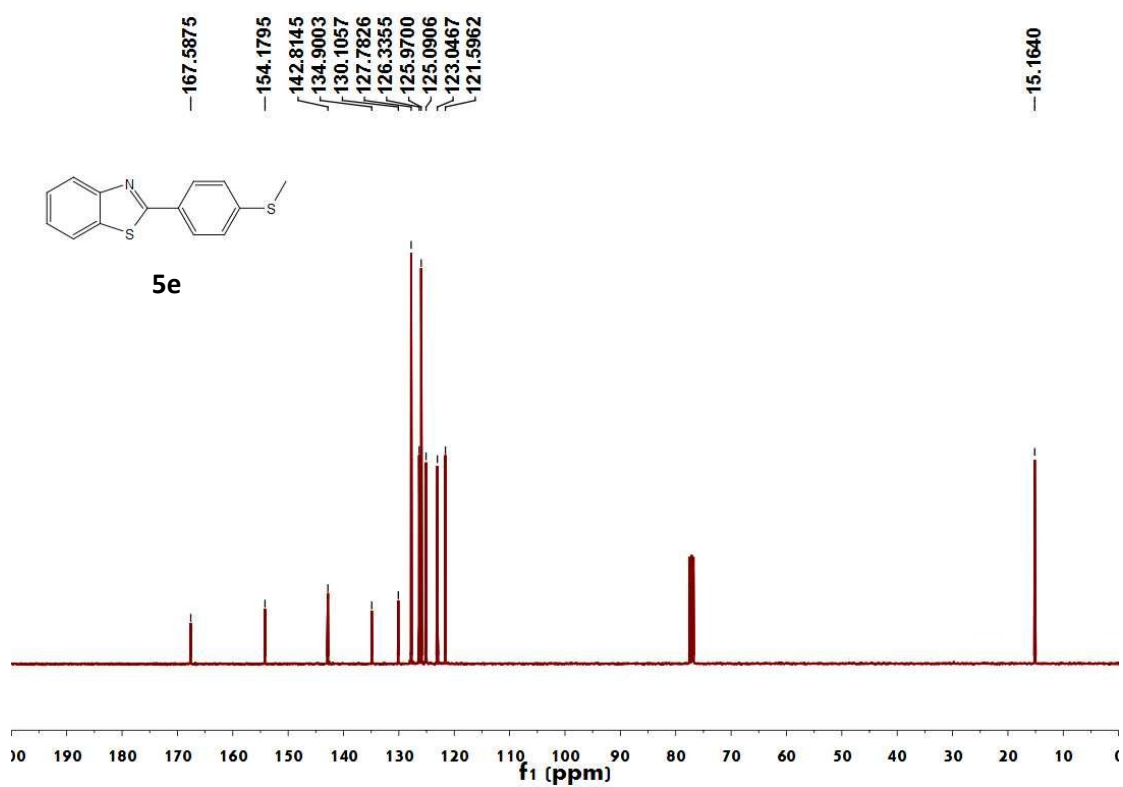

8.0710  
8.0576  
8.0548  
8.0488  
8.0355  
7.8702  
7.8692  
7.8503  
7.8493  
7.4933  
7.4904  
7.4752  
7.4725  
7.4549  
7.4519  
7.3796  
7.3769  
7.3594  
7.3416  
7.3389  
7.1729  
7.1676  
7.1513  
7.1348  
7.1297

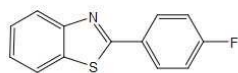

5f

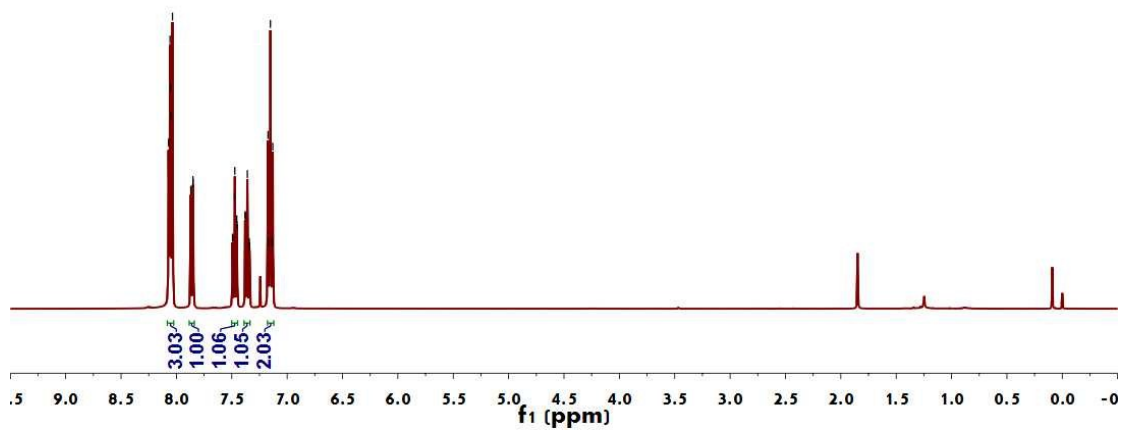

166.7345  
165.7157  
163.2129  
154.1236  
135.0768  
129.9924  
129.9599  
129.5734  
129.4873  
126.4265  
125.2610  
123.2163  
121.6265  
116.2681  
116.0485

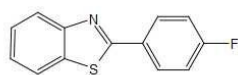

5f

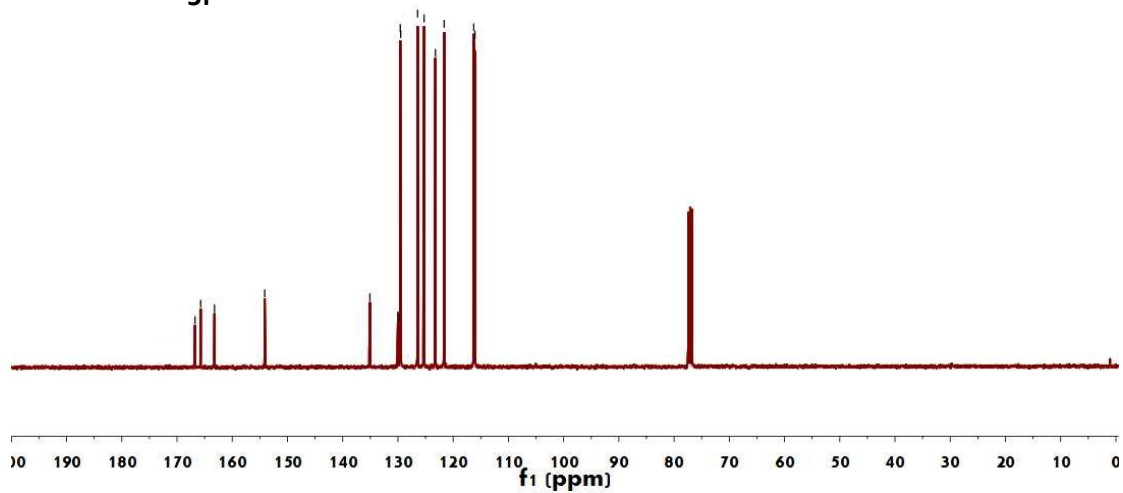

8.0839  
8.0798  
8.0754  
8.0605  
8.0401  
7.8937  
7.8899  
7.8747  
7.8710  
7.8660  
7.8586  
7.8511  
7.8386  
7.8312  
7.4893  
7.4864  
7.4709  
7.4685  
7.4663  
7.4509  
7.4479  
7.4181  
7.4165  
7.4134  
7.4010  
7.3979  
7.3964  
7.3935  
7.3760  
7.3749  
7.3560  
7.3451  
7.3410  
7.3381  
7.3355

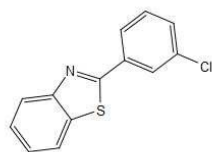

5g

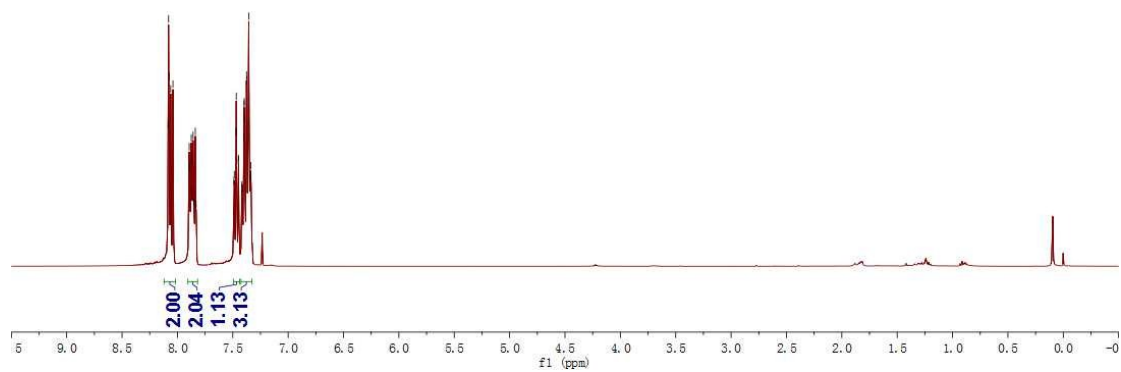

166.2348  
153.9995  
135.2728  
135.1590  
135.1078  
130.8335  
130.2348  
127.3879  
126.5363  
125.6897  
125.5646  
123.4734  
121.6951

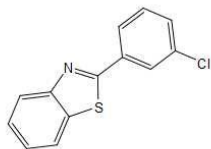

5g

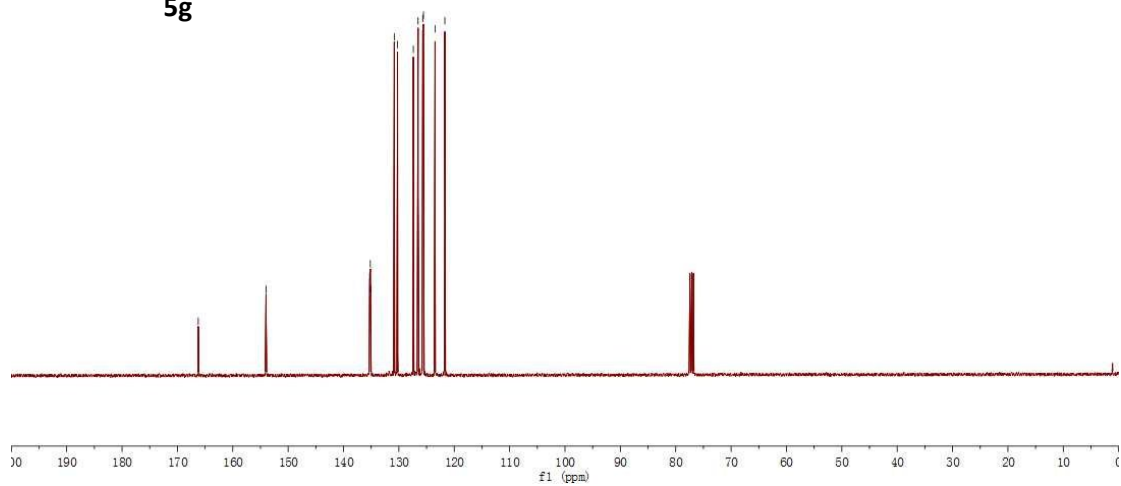

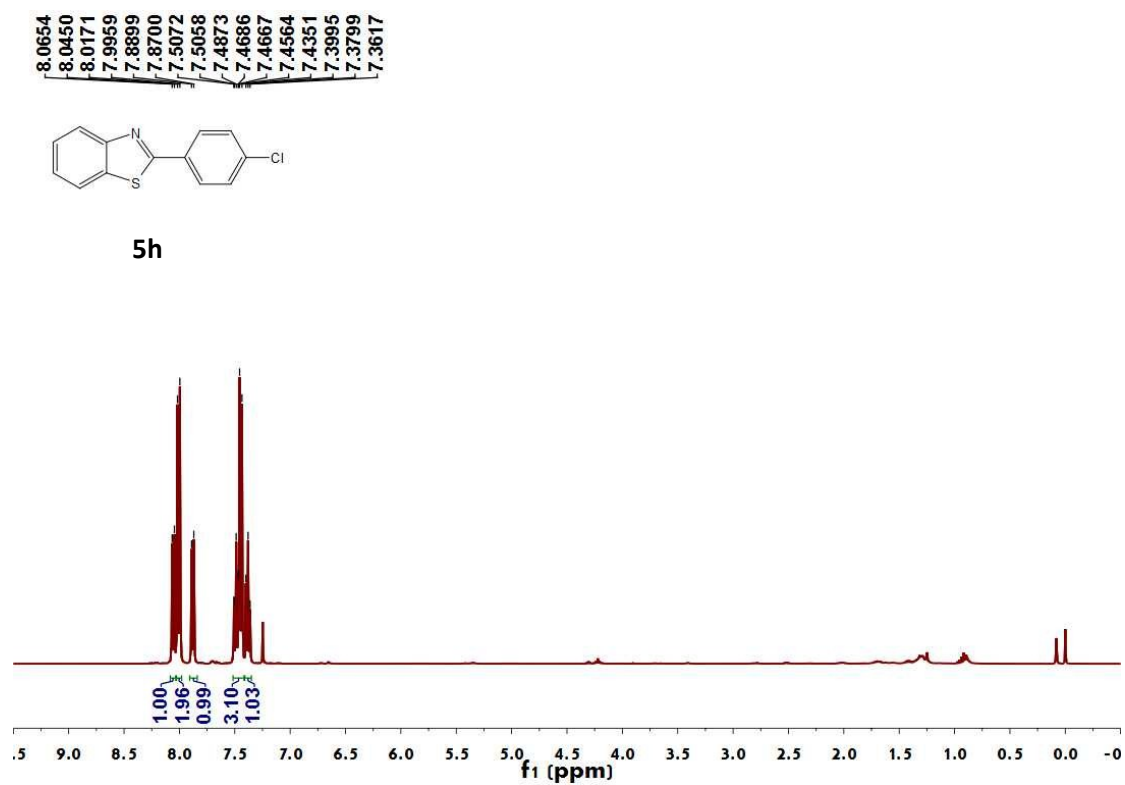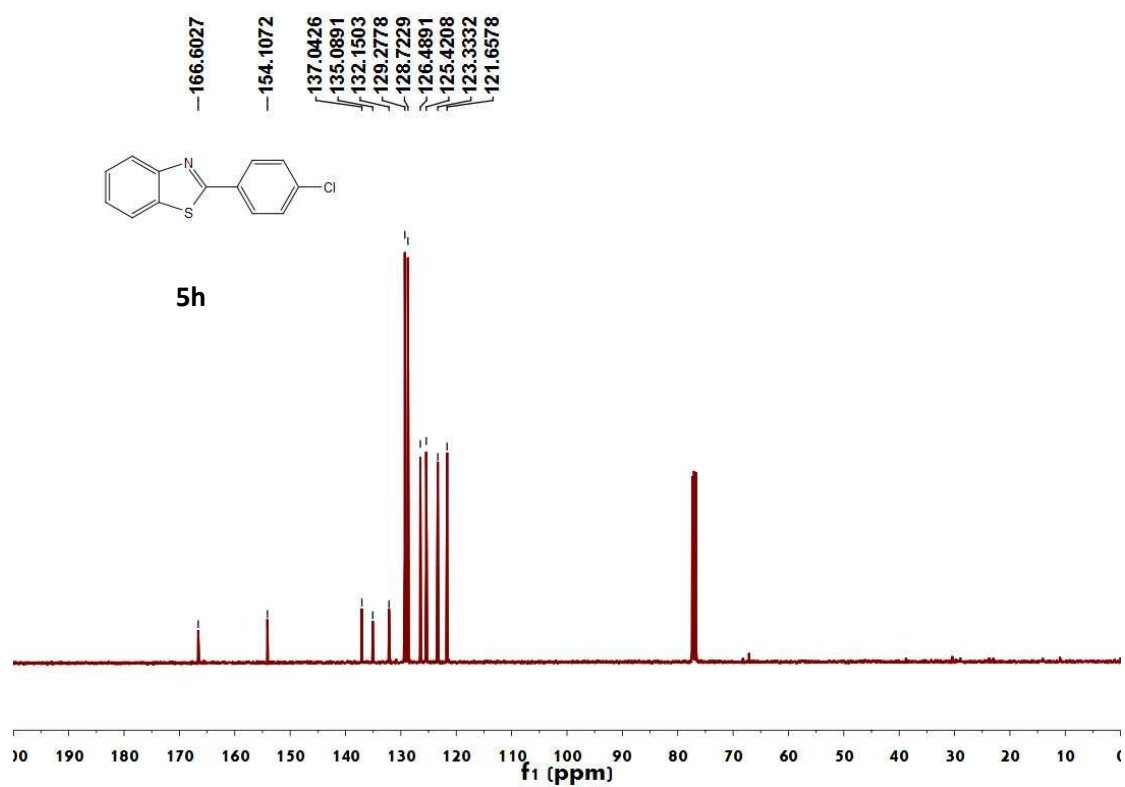

8.2560  
8.2518  
8.2476  
8.0704  
8.0501  
7.9554  
7.9359  
7.8811  
7.8618  
7.5892  
7.5871  
7.5850  
7.5828  
7.5693  
7.5672  
7.5650  
7.5628  
7.5046  
7.5018  
7.4840  
7.4662  
7.4634  
7.3971  
7.3945  
7.3769  
7.3591  
7.3565  
7.3352  
7.3154  
7.2957

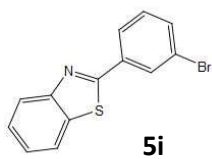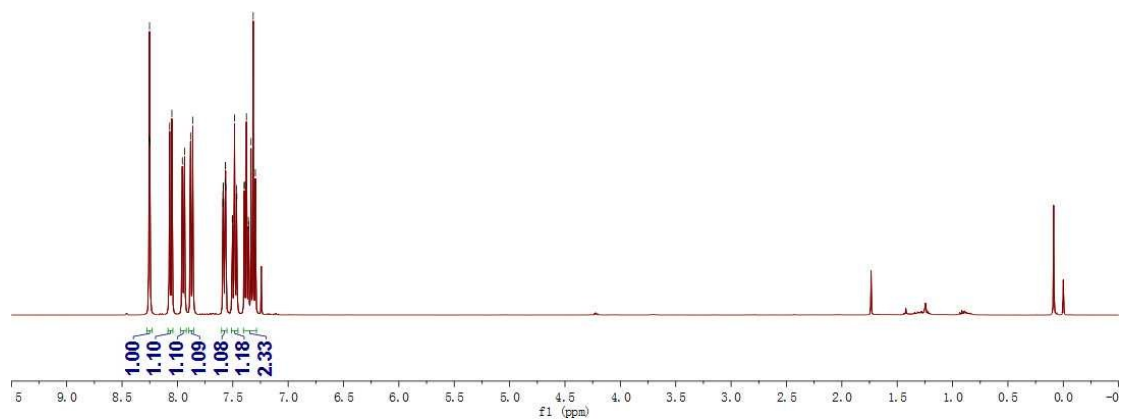

165.0116  
152.9009  
134.3981  
134.0215  
132.6761  
129.3899  
129.1659  
125.4573  
125.0649  
124.4853  
122.3830  
122.1207  
120.6115

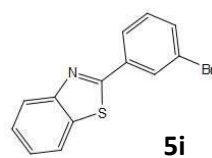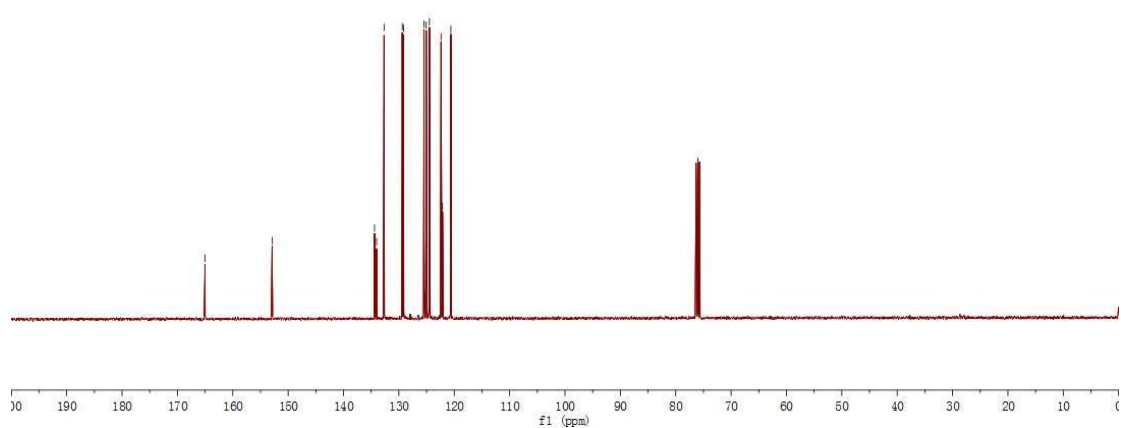

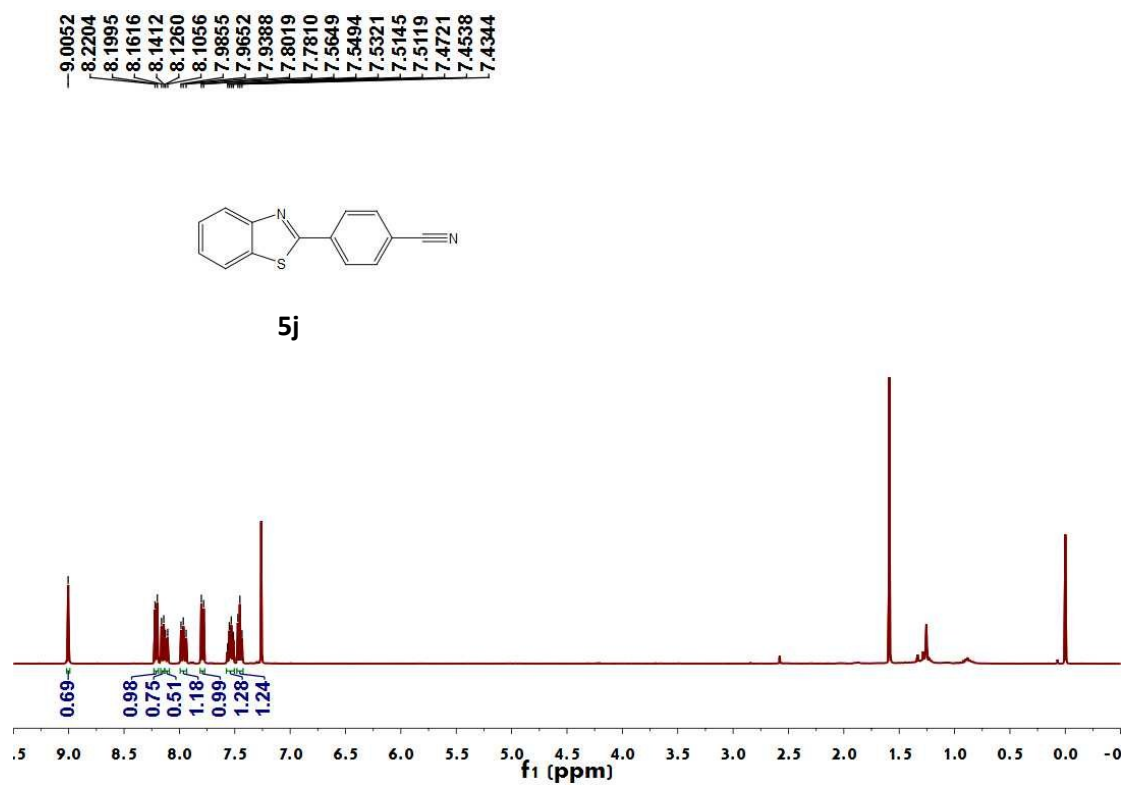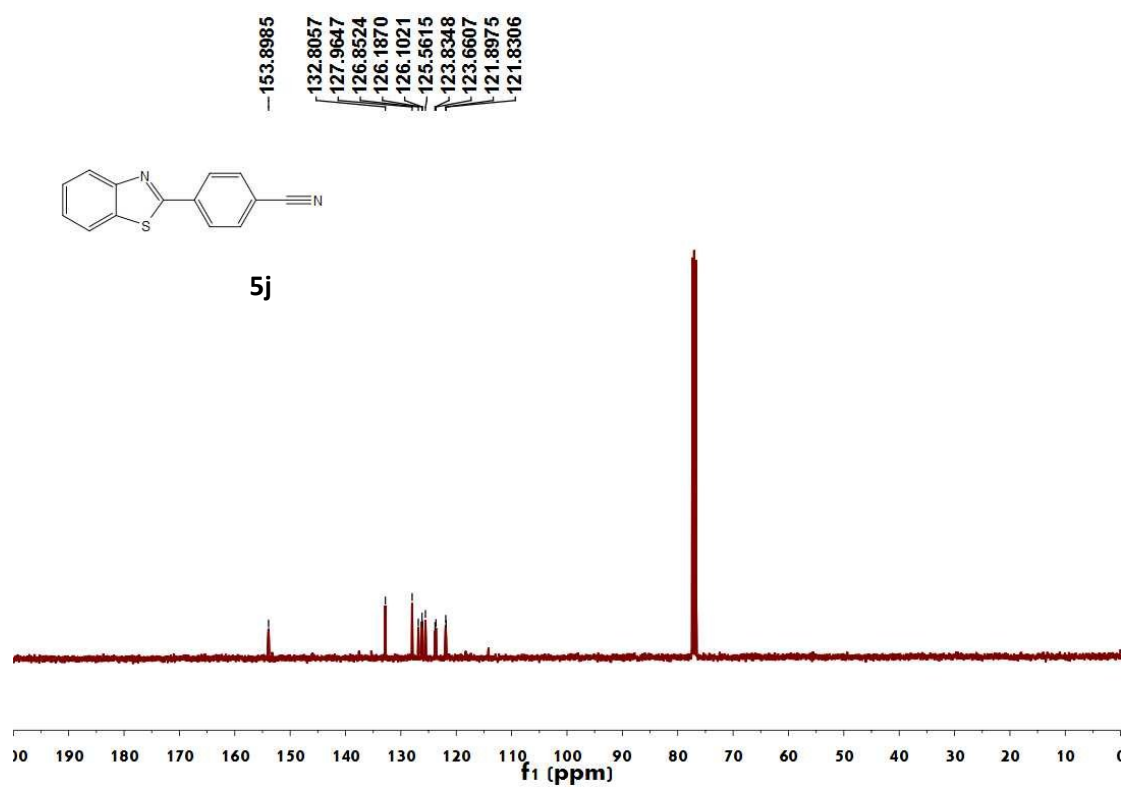



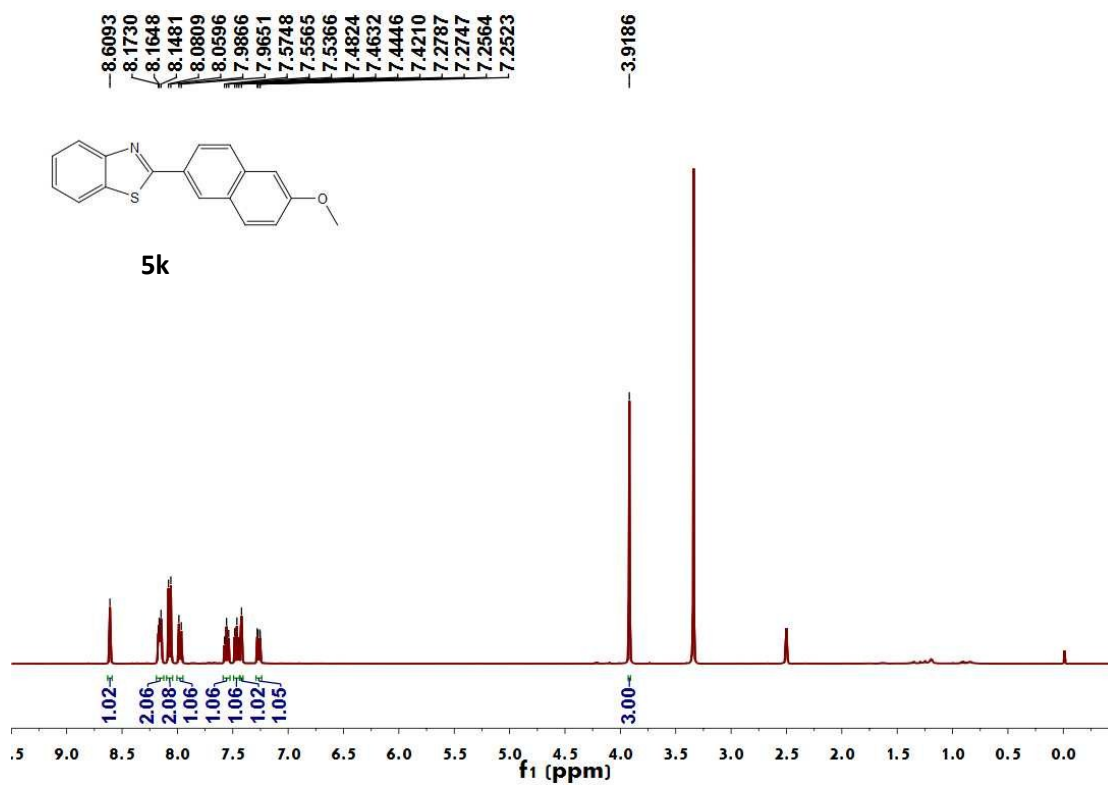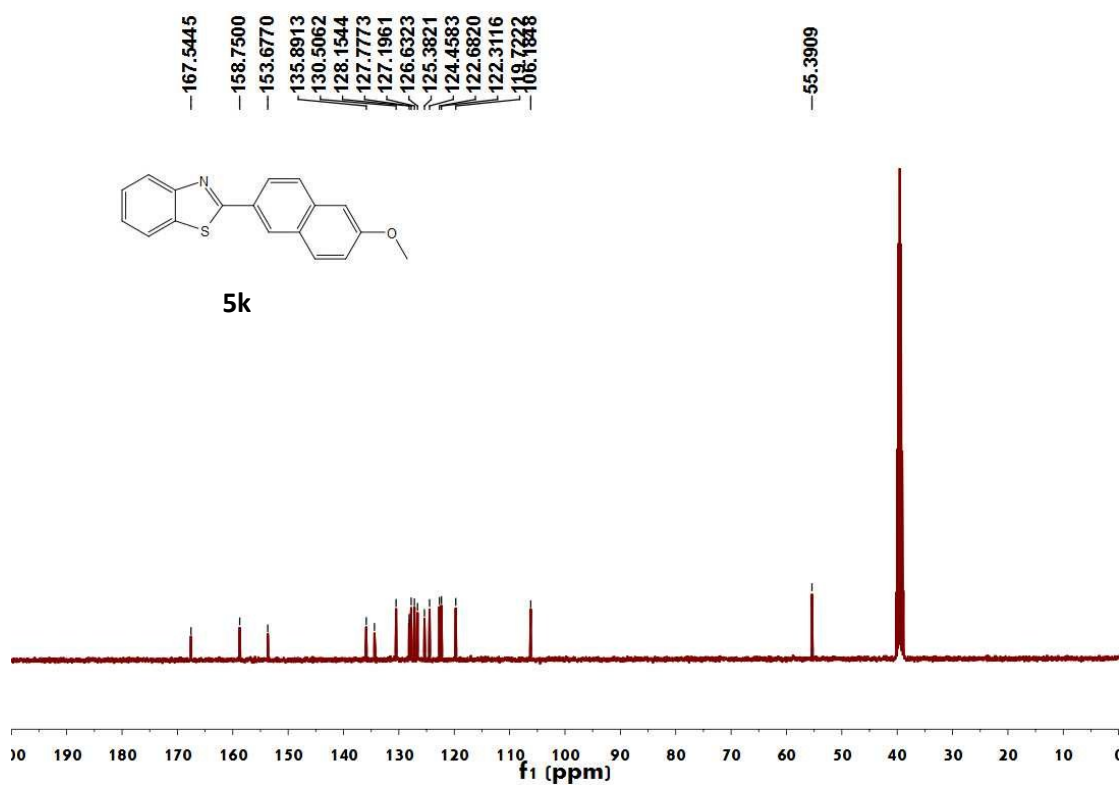

8.5489  
8.2084  
8.2045  
8.1871  
8.1831  
8.1180  
8.0977  
7.9602  
7.9448  
7.9367  
7.9157  
7.8970  
7.8701  
7.8601  
7.8470  
7.5433  
7.5376  
7.5327  
7.5303  
7.5254  
7.5196  
7.5084  
7.4987  
7.4804  
7.4014  
7.3831  
7.3649

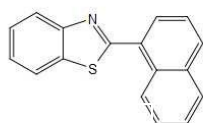

5l

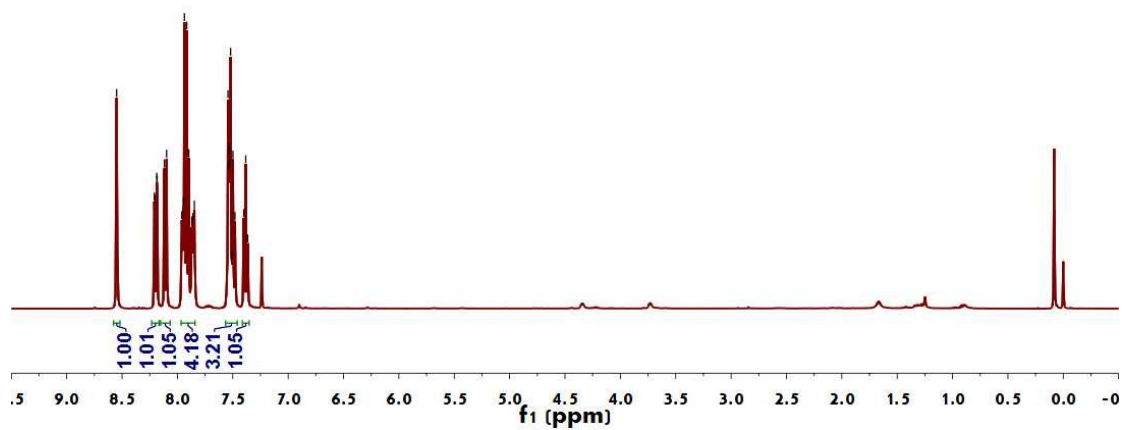

167.0467  
153.2076  
134.0986  
133.5618  
132.1404  
129.9461  
127.7790  
127.7696  
126.8272  
126.5302  
126.4076  
125.8313  
125.3403  
124.1956  
123.3968  
122.2011  
120.5995

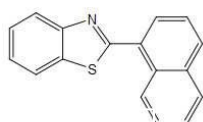

5l

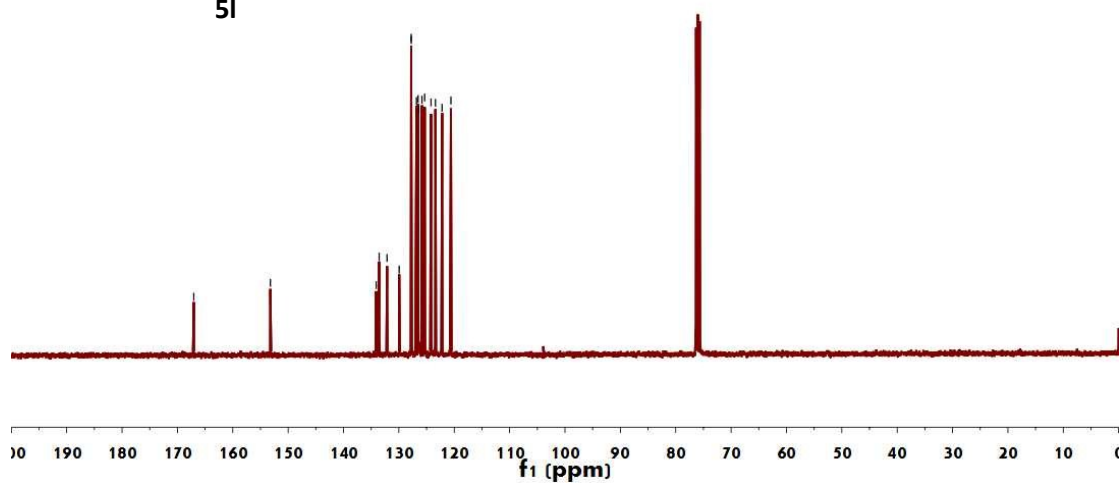

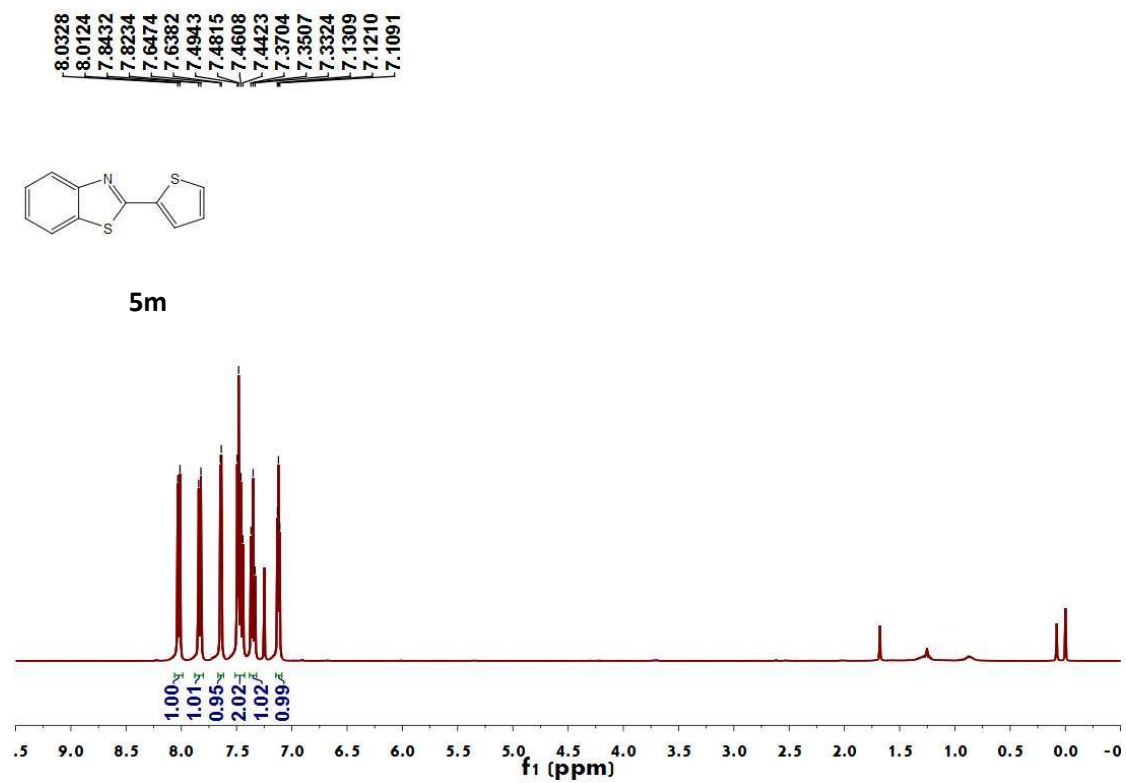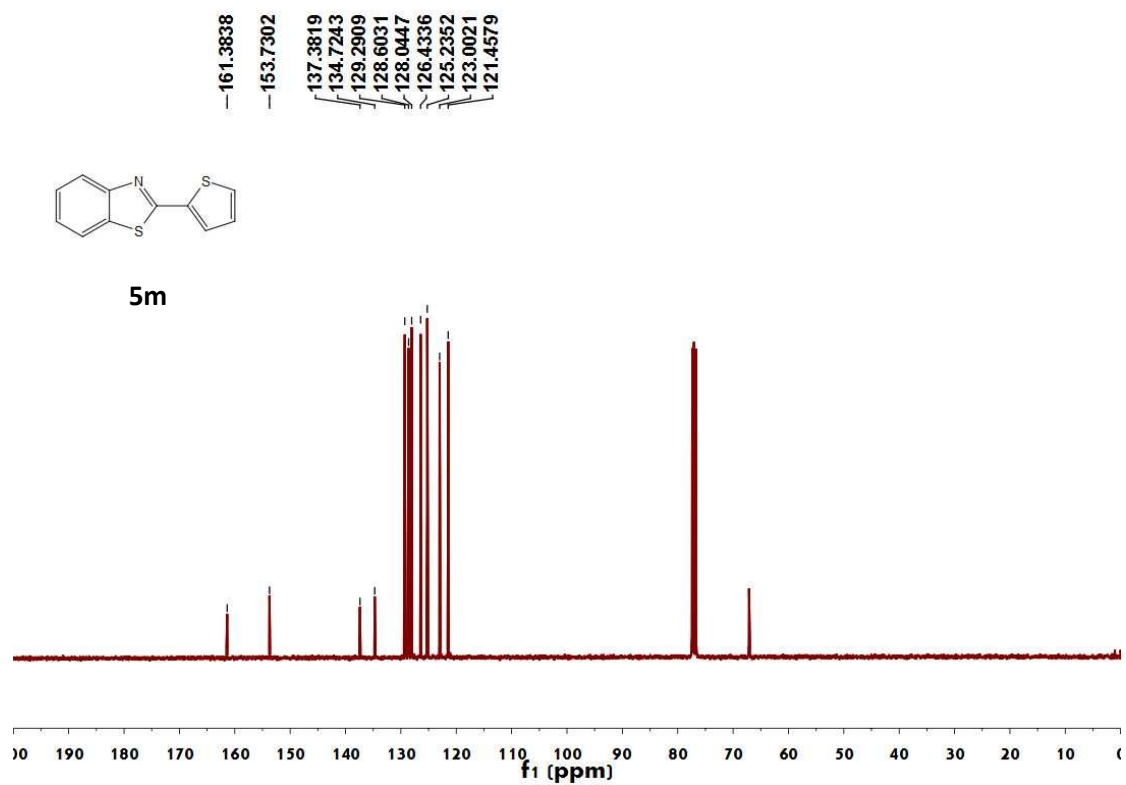

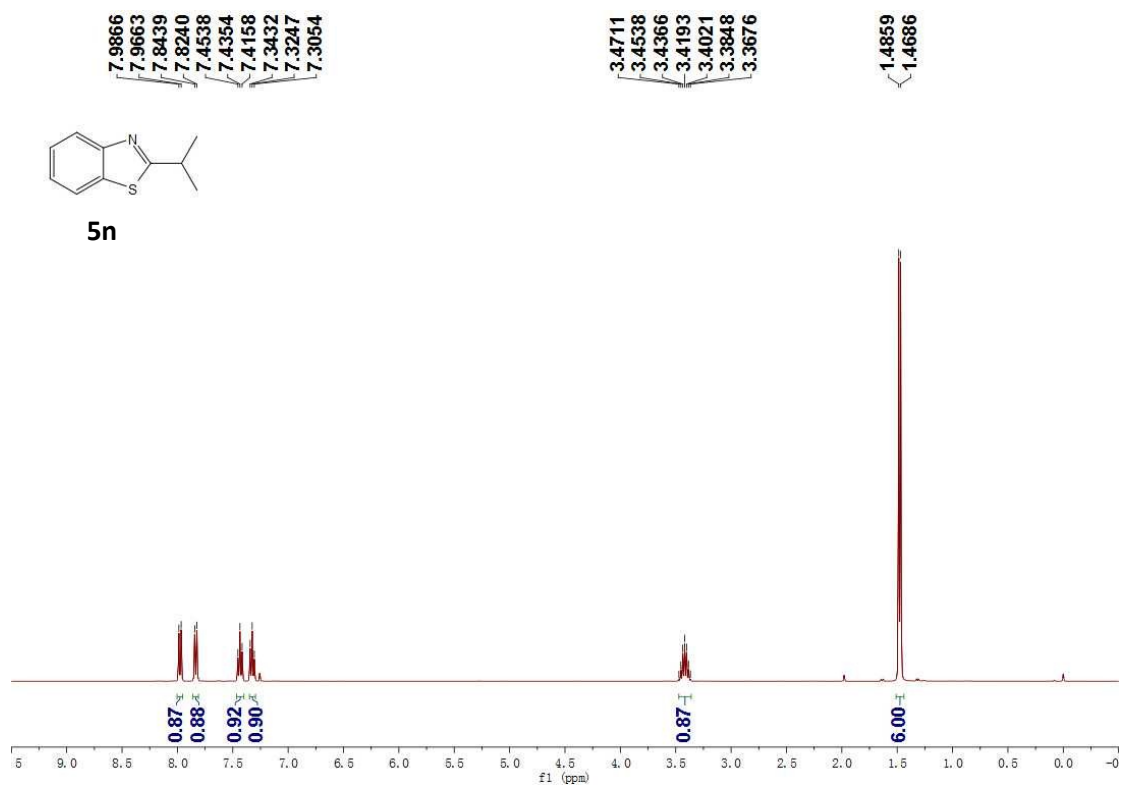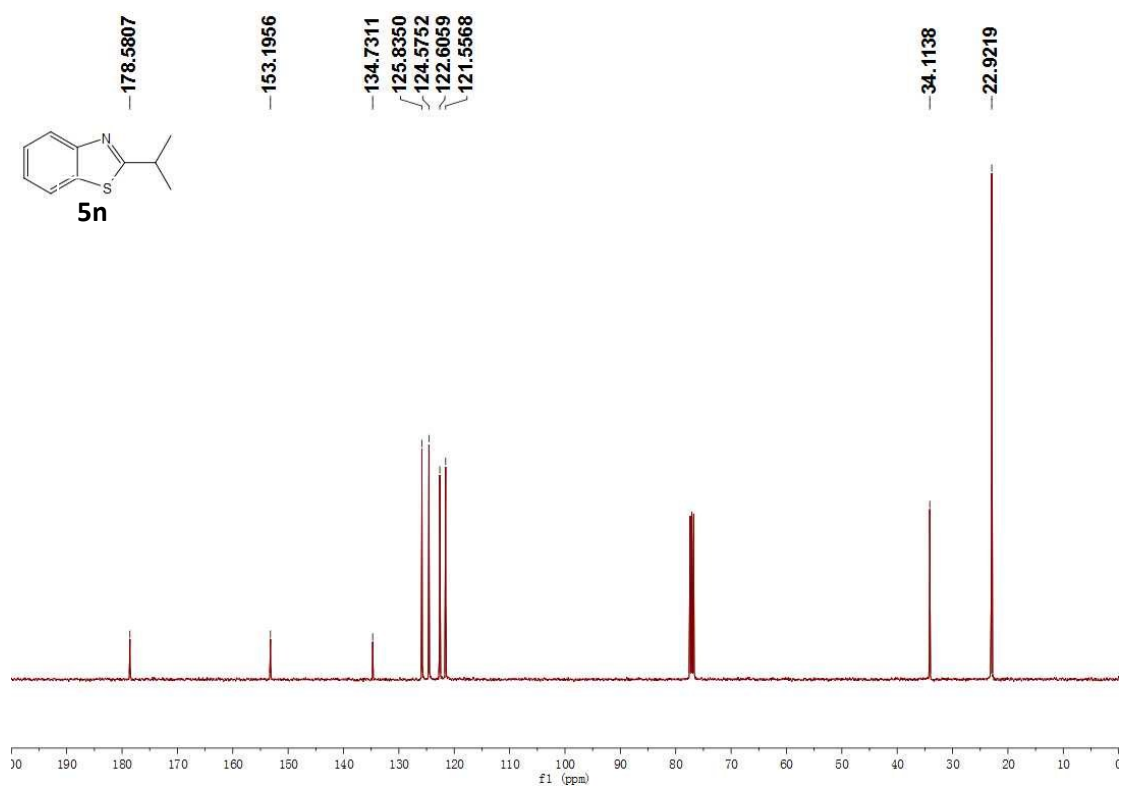

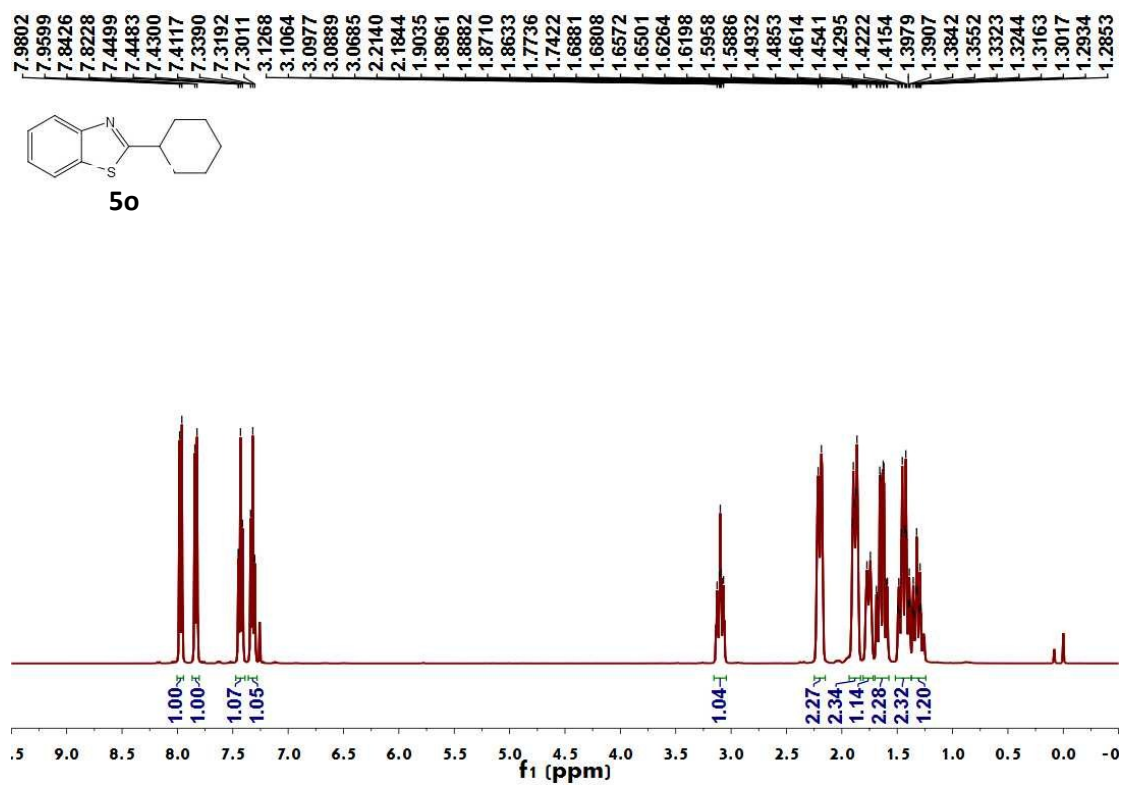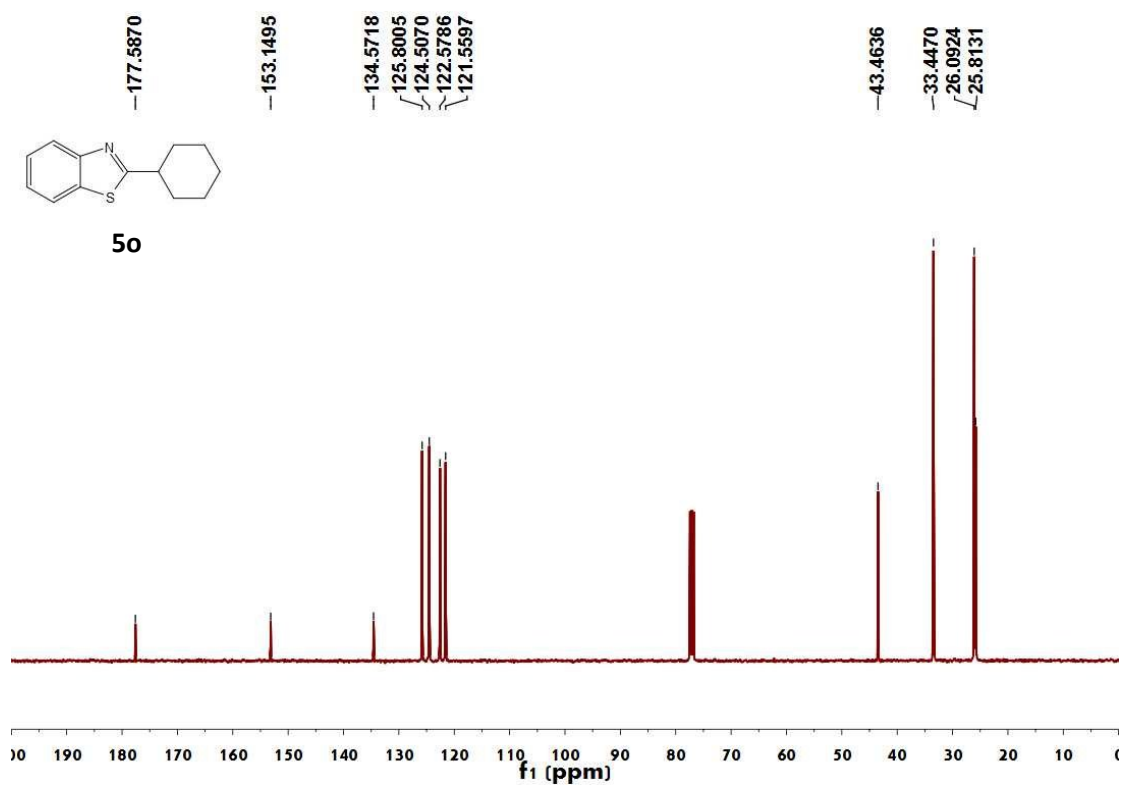

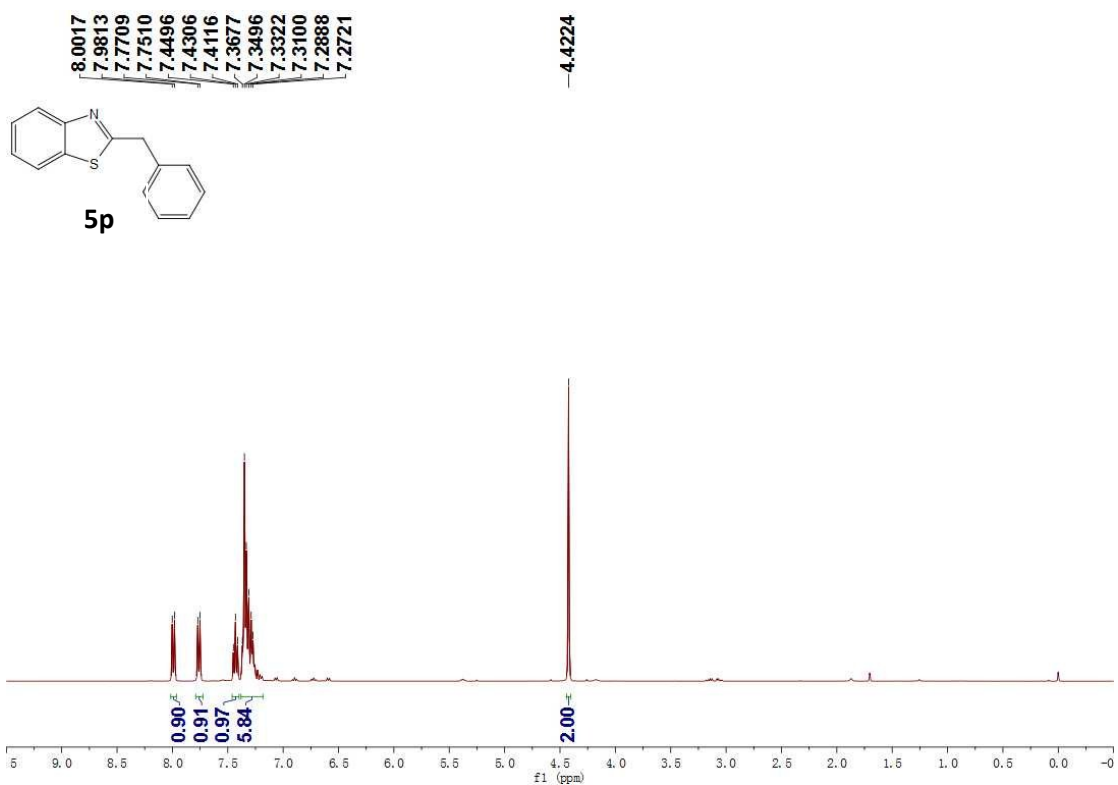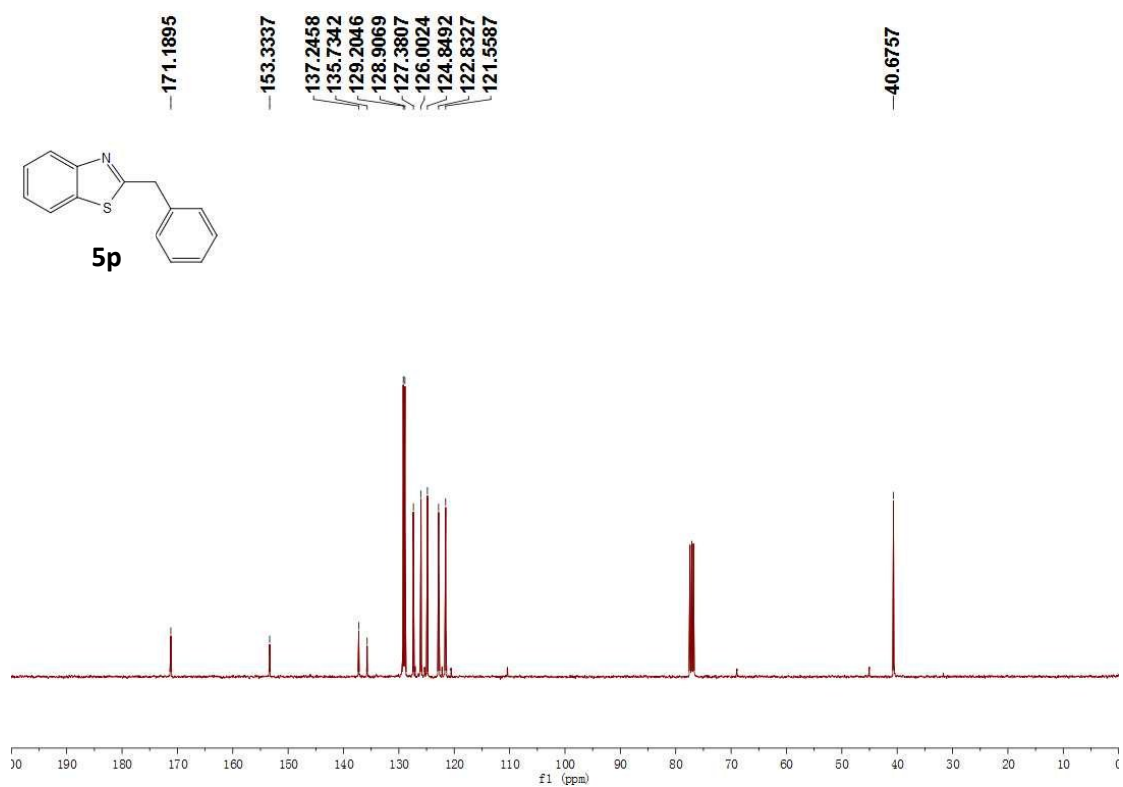

Supplement: c8ob02826e1.pdf [file c8ob02826e1.pdf]
